# Supplementary material for: Upregulation of Yin-Yang-1 Associates with Proliferation and Glutamine Metabolism in Esophageal Carcinoma
Source: Hindawi journal article supplement (doi:10.1155/2022/9305081), 2022-03-20
Supplement: f2 [file 9305081.f2.pdf]

*Table S1 Primers and oligonucleotides sequences*

| <b>Oligonucleotides</b> |                          |
|-------------------------|--------------------------|
| <b>PCR primers</b>      |                          |
| PCR-YY1-F               | GCGGAGCCCTCAGCCATGGCCTCG |
| PCR-YY1-R               | CAGCGGCTGCAGAGCGATCATGG  |
| PCR-GAPDH-F             | GGAGCGAGATCCCTCCAAAAT    |
| PCR-GAPDH-R             | GGCTGTTGTCATACTTCTCATGG  |
| <b>siRNAs</b>           |                          |
| Human YY1 siRNA1        | CGACGACTACATTGAACAA      |
| Human YY1 siRNA2        | CCTGAAATCTCACATCTTA      |

*Note: F: Forward Primer; R: Reverse primer*
