# Supplementary material for: Upregulation of Yin-Yang-1 Associates with Proliferation and Glutamine Metabolism in Esophageal Carcinoma
Source: Hindawi journal article supplement (doi:10.1155/2022/9305081), 2022-03-20
Supplement: f3 [file 9305081.f3.pdf]

| Query     | Statistic    | P-value     | FDR (BH)   | Event_SD | Event_TD |
|-----------|--------------|-------------|------------|----------|----------|
| TLK2      | 0.243524337  | 0.000865017 | 0.00999145 | 179      | 182      |
| TPD52     | 0.243581748  | 0.000862504 | 0.00996707 | 179      | 181      |
| PSKH2     | 0.243626173  | 0.000860564 | 0.00994929 | 179      | 182      |
| ZIM2      | -0.243632162 | 0.000860303 | 0.00994929 | 179      | 183      |
| ARID3A    | 0.243674451  | 0.00085846  | 0.00993424 | 179      | 183      |
| CFD       | 0.243674451  | 0.00085846  | 0.00993424 | 179      | 183      |
| ELANE     | 0.243674451  | 0.00085846  | 0.00993424 | 179      | 183      |
| KISS1R    | 0.243674451  | 0.00085846  | 0.00993424 | 179      | 183      |
| MED16     | 0.243674451  | 0.00085846  | 0.00993424 | 179      | 183      |
| PRTN3     | 0.243674451  | 0.00085846  | 0.00993424 | 179      | 183      |
| R3HDM4    | 0.243674451  | 0.00085846  | 0.00993424 | 179      | 183      |
| WDR18     | 0.243674451  | 0.00085846  | 0.00993424 | 179      | 183      |
| SLC25A39  | 0.243837891  | 0.000851373 | 0.00988918 | 179      | 181      |
| ZMAT1     | 0.243856355  | 0.000850576 | 0.00988455 | 179      | 175      |
| TCEAL2    | 0.243856355  | 0.000850576 | 0.00988455 | 179      | 175      |
| TCEAL6    | 0.243856355  | 0.000850576 | 0.00988455 | 179      | 175      |
| BEX5      | 0.243856355  | 0.000850576 | 0.00988455 | 179      | 175      |
| TCP11X3P  | 0.243856355  | 0.000850576 | 0.00988455 | 179      | 175      |
| MIR1284   | -0.243908254 | 0.000848338 | 0.00988172 | 179      | 181      |
| PHOSPHO1  | 0.243941203  | 0.000846921 | 0.00986985 | 179      | 181      |
| ZNF274    | -0.244005292 | 0.00084417  | 0.00984242 | 179      | 183      |
| RN7SKP32  | 0.244006972  | 0.000844098 | 0.00984242 | 179      | 180      |
| ZNF329    | -0.244048637 | 0.000842314 | 0.00983003 | 179      | 183      |
| GXYLT2    | -0.244158936 | 0.000837608 | 0.00977972 | 179      | 181      |
| ZNF784    | -0.244170601 | 0.000837111 | 0.00977854 | 179      | 183      |
| ZNF580    | -0.244170601 | 0.000837111 | 0.00977854 | 179      | 183      |
| ZNF581    | -0.244170601 | 0.000837111 | 0.00977854 | 179      | 183      |
| CCDC106   | -0.244170601 | 0.000837111 | 0.00977854 | 179      | 183      |
| EIF4E3    | -0.244306062 | 0.000831368 | 0.0097298  | 179      | 181      |
| GPR27     | -0.244306062 | 0.000831368 | 0.0097298  | 179      | 181      |
| PROK2     | -0.244306062 | 0.000831368 | 0.0097298  | 179      | 181      |
| RN7SL271F | -0.244306062 | 0.000831368 | 0.0097298  | 179      | 181      |
| LINC00877 | -0.244306062 | 0.000831368 | 0.0097298  | 179      | 181      |
| LINC0087C | -0.244306062 | 0.000831368 | 0.0097298  | 179      | 181      |
| ABCA7     | 0.244423832  | 0.000826405 | 0.0096992  | 179      | 183      |
| HMHA1     | 0.244423832  | 0.000826405 | 0.0096992  | 179      | 183      |
| POLR2E    | 0.244423832  | 0.000826405 | 0.0096992  | 179      | 183      |
| GPX4      | 0.244423832  | 0.000826405 | 0.0096992  | 179      | 183      |
| RYBP      | -0.244473662 | 0.000824313 | 0.00969301 | 179      | 181      |
| RNA5SP517 | 0.244565817  | 0.000820457 | 0.00965225 | 179      | 175      |
| CXorf51A  | 0.244565817  | 0.000820457 | 0.00965225 | 179      | 175      |
| CXorf51B  | 0.244565817  | 0.000820457 | 0.00965225 | 179      | 175      |
| HLF       | 0.244600037  | 0.000819029 | 0.0096492  | 179      | 181      |
| MMD       | 0.244600037  | 0.000819029 | 0.0096492  | 179      | 181      |
| SNORA68 E | 0.244858192  | 0.000808332 | 0.00953224 | 179      | 181      |
| ATP5G1    | 0.244858192  | 0.000808332 | 0.00953224 | 179      | 181      |
| UBE2Z     | 0.244858192  | 0.000808332 | 0.00953224 | 179      | 181      |
| STK11     | 0.244901586  | 0.000806547 | 0.00952479 | 179      | 183      |
| FUT1      | -0.244915523 | 0.000805974 | 0.00952257 | 179      | 183      |
| FGF21     | -0.244915523 | 0.000805974 | 0.00952257 | 179      | 183      |

|           |              |             |            |     |     |
|-----------|--------------|-------------|------------|-----|-----|
| GALP      | -0.245142489 | 0.000796701 | 0.00942199 | 179 | 183 |
| ZSCAN5B   | -0.245142489 | 0.000796701 | 0.00942199 | 179 | 183 |
| ZSCAN5C   | -0.245142489 | 0.000796701 | 0.00942199 | 179 | 183 |
| ZSCAN5D   | -0.245142489 | 0.000796701 | 0.00942199 | 179 | 183 |
| PPP4R2    | -0.245155865 | 0.000796158 | 0.00942199 | 179 | 181 |
| MIR767    | 0.245200368  | 0.000794353 | 0.00941669 | 179 | 175 |
| U2AF2     | -0.245242664 | 0.00079264  | 0.00940089 | 179 | 183 |
| ZNF787    | -0.245323574 | 0.000789374 | 0.00936663 | 179 | 183 |
| GABRA3    | 0.245338117  | 0.000788788 | 0.00936416 | 179 | 175 |
| ZNF652    | 0.245377369  | 0.000787209 | 0.0093499  | 179 | 181 |
| RIMS2     | 0.245540307  | 0.000780685 | 0.00927686 | 179 | 180 |
| snoU13 EN | -0.245622273 | 0.000777422 | 0.00924251 | 179 | 179 |
| TMEM40    | -0.245622273 | 0.000777422 | 0.00924251 | 179 | 179 |
| CAND2     | -0.245622273 | 0.000777422 | 0.00924251 | 179 | 179 |
| RPL32     | -0.245622273 | 0.000777422 | 0.00924251 | 179 | 179 |
| SNORA7A   | -0.245622273 | 0.000777422 | 0.00924251 | 179 | 179 |
| SNORA25 E | 0.245721329  | 0.000773495 | 0.00921795 | 179 | 176 |
| PCDH19    | 0.245721329  | 0.000773495 | 0.00921795 | 179 | 176 |
| FZD2      | 0.245813836  | 0.000769845 | 0.00918328 | 179 | 181 |
| ZSCAN4    | -0.245944968 | 0.000764697 | 0.00912627 | 179 | 183 |
| ZNF551    | -0.245944968 | 0.000764697 | 0.00912627 | 179 | 183 |
| ZNF154    | -0.245944968 | 0.000764697 | 0.00912627 | 179 | 183 |
| ZNF135    | -0.245958817 | 0.000764155 | 0.00912627 | 179 | 183 |
| MBNL1     | 0.246793583  | 0.000732144 | 0.00875463 | 179 | 181 |
| TMEM14E   | 0.246793583  | 0.000732144 | 0.00875463 | 179 | 181 |
| P2RY1     | 0.246793583  | 0.000732144 | 0.00875463 | 179 | 181 |
| SBNO2     | 0.246805861  | 0.000731682 | 0.00875463 | 179 | 183 |
| ZNF134    | -0.246949606 | 0.000726299 | 0.00870154 | 179 | 183 |
| ZNF211    | -0.246949606 | 0.000726299 | 0.00870154 | 179 | 183 |
| ARL13A    | 0.247023653  | 0.000723541 | 0.00867688 | 179 | 176 |
| TMEM35    | 0.247023653  | 0.000723541 | 0.00867688 | 179 | 176 |
| TRMT2B    | 0.247023653  | 0.000723541 | 0.00867688 | 179 | 176 |
| XKRX      | 0.247023653  | 0.000723541 | 0.00867688 | 179 | 176 |
| NOG       | 0.247067334  | 0.000721918 | 0.00867422 | 179 | 181 |
| TSEN2     | -0.247134533 | 0.000719428 | 0.00864849 | 179 | 179 |
| RNA5SP123 | -0.247134533 | 0.000719428 | 0.00864849 | 179 | 179 |
| C3orf83   | -0.247134533 | 0.000719428 | 0.00864849 | 179 | 179 |
| MKRN2     | -0.247134533 | 0.000719428 | 0.00864849 | 179 | 179 |
| RAF1      | -0.247134533 | 0.000719428 | 0.00864849 | 179 | 179 |
| TEX14     | 0.24757639   | 0.000703251 | 0.00847459 | 179 | 181 |
| U3 ENSGOC | 0.24757639   | 0.000703251 | 0.00847459 | 179 | 181 |
| CNGB3     | 0.247848174  | 0.000693469 | 0.00836484 | 179 | 182 |
| ZNF544    | -0.247848532 | 0.000693456 | 0.00836484 | 179 | 183 |
| ZNF8      | -0.247848532 | 0.000693456 | 0.00836484 | 179 | 183 |
| ZNF418    | -0.24795039  | 0.000689822 | 0.00833302 | 179 | 183 |
| ZNF256    | -0.24795039  | 0.000689822 | 0.00833302 | 179 | 183 |
| C19orf18  | -0.24795039  | 0.000689822 | 0.00833302 | 179 | 183 |
| ZNF606    | -0.24795039  | 0.000689822 | 0.00833302 | 179 | 183 |
| ZSCAN1    | -0.24795039  | 0.000689822 | 0.00833302 | 179 | 183 |
| U8 ENSGOC | 0.24805335   | 0.000686167 | 0.00830912 | 179 | 182 |
| TTC14     | 0.24805335   | 0.000686167 | 0.00830912 | 179 | 182 |

|           |              |             |            |     |     |
|-----------|--------------|-------------|------------|-----|-----|
| RN7SL229F | 0.24805335   | 0.000686167 | 0.00830912 | 179 | 182 |
| CCDC39    | 0.248274769  | 0.000678366 | 0.00822673 | 179 | 182 |
| ZNF548    | -0.24882126  | 0.000659462 | 0.00800139 | 179 | 183 |
| ZNF17     | -0.24882126  | 0.000659462 | 0.00800139 | 179 | 183 |
| RN7SL526F | -0.248929021 | 0.000655792 | 0.00796466 | 179 | 183 |
| RNA5SP13C | -0.249129492 | 0.000649015 | 0.00788622 | 179 | 181 |
| SHQ1      | -0.249129492 | 0.000649015 | 0.00788622 | 179 | 181 |
| B4GALNT2  | 0.249239896  | 0.000645311 | 0.0078489  | 179 | 181 |
| KIF18B    | 0.249822887  | 0.00062607  | 0.00761861 | 179 | 181 |
| PPARG     | -0.250039613 | 0.000619053 | 0.00753693 | 179 | 179 |
| RN7SKP14  | 0.250214318  | 0.000613449 | 0.00747238 | 179 | 181 |
| DCAF4L2   | 0.250300282  | 0.000610709 | 0.00744266 | 179 | 182 |
| ZNF530    | -0.250364217 | 0.000608679 | 0.00742157 | 179 | 183 |
| RNA5SP271 | 0.250485942  | 0.00060483  | 0.00737827 | 179 | 181 |
| NACAP1    | 0.250488351  | 0.000604754 | 0.00737827 | 179 | 180 |
| RN7SL563F | 0.250488351  | 0.000604754 | 0.00737827 | 179 | 180 |
| PABPC1    | 0.250531696  | 0.000603389 | 0.00737159 | 179 | 180 |
| RNU6ATAC4 | 0.250531696  | 0.000603389 | 0.00737159 | 179 | 180 |
| MIR5089   | 0.250568423  | 0.000602235 | 0.00736475 | 179 | 181 |
| LRRC37A17 | 0.250568423  | 0.000602235 | 0.00736475 | 179 | 181 |
| RPRML     | 0.250568423  | 0.000602235 | 0.00736475 | 179 | 181 |
| ZC2HC1A   | 0.250605862  | 0.000601061 | 0.00736129 | 179 | 181 |
| IL7       | 0.250605862  | 0.000601061 | 0.00736129 | 179 | 181 |
| GNGT2     | 0.250625012  | 0.000600461 | 0.00736122 | 179 | 181 |
| ABI3      | 0.250625012  | 0.000600461 | 0.00736122 | 179 | 181 |
| SNX31     | 0.250687012  | 0.000598522 | 0.00734472 | 179 | 181 |
| U8 ENSGOC | 0.250828486  | 0.00059412  | 0.00729431 | 179 | 181 |
| MSC       | 0.250828486  | 0.00059412  | 0.00729431 | 179 | 181 |
| TBC1D3P2  | 0.251256654  | 0.000580979 | 0.00714005 | 179 | 182 |
| TAF7L     | 0.251280313  | 0.000580261 | 0.00713476 | 179 | 175 |
| BTK       | 0.251280313  | 0.000580261 | 0.00713476 | 179 | 175 |
| TIMM8A    | 0.251280313  | 0.000580261 | 0.00713476 | 179 | 175 |
| RPL36A    | 0.251280313  | 0.000580261 | 0.00713476 | 179 | 175 |
| GLA       | 0.251280313  | 0.000580261 | 0.00713476 | 179 | 175 |
| HNRNPH2   | 0.251280313  | 0.000580261 | 0.00713476 | 179 | 175 |
| ARMCX4    | 0.251280313  | 0.000580261 | 0.00713476 | 179 | 175 |
| ARMCX1    | 0.251280313  | 0.000580261 | 0.00713476 | 179 | 175 |
| ARMCX6    | 0.251280313  | 0.000580261 | 0.00713476 | 179 | 175 |
| ARMCX3    | 0.251280313  | 0.000580261 | 0.00713476 | 179 | 175 |
| ARMCX2    | 0.251280313  | 0.000580261 | 0.00713476 | 179 | 175 |
| NXF5      | 0.251280313  | 0.000580261 | 0.00713476 | 179 | 175 |
| MIR1203   | 0.251475057  | 0.00057438  | 0.00710476 | 179 | 181 |
| ANKRD46   | 0.252028769  | 0.000557958 | 0.00690508 | 179 | 181 |
| ZNF549    | -0.252370602 | 0.000548038 | 0.0067857  | 179 | 183 |
| ZNF550    | -0.252370602 | 0.000548038 | 0.0067857  | 179 | 183 |
| ZNF416    | -0.252370602 | 0.000548038 | 0.0067857  | 179 | 183 |
| ZIK1      | -0.252370602 | 0.000548038 | 0.0067857  | 179 | 183 |
| FMNL1     | 0.253105672  | 0.000527254 | 0.00654144 | 179 | 181 |
| SPATA32   | 0.253105672  | 0.000527254 | 0.00654144 | 179 | 181 |
| MAP3K14   | 0.253105672  | 0.000527254 | 0.00654144 | 179 | 181 |
| CLTC      | 0.253264392  | 0.000522864 | 0.00649672 | 179 | 181 |

|           |              |             |            |     |     |
|-----------|--------------|-------------|------------|-----|-----|
| NIPAL2    | 0.253691629  | 0.000511212 | 0.00635513 | 179 | 181 |
| ANGPT1    | 0.253699953  | 0.000510987 | 0.00635513 | 179 | 180 |
| RNA5SP269 | 0.253801809  | 0.000508246 | 0.00632461 | 179 | 181 |
| NMT1      | 0.253956076  | 0.00050412  | 0.00627643 | 179 | 181 |
| TRPA1     | 0.254316647  | 0.000494598 | 0.00616096 | 179 | 181 |
| ODF1      | 0.254535069  | 0.000488911 | 0.00609318 | 179 | 180 |
| DCAF13    | 0.254721934  | 0.000484093 | 0.00603618 | 179 | 180 |
| RN7SL405F | 0.254843081  | 0.000480993 | 0.00600055 | 179 | 181 |
| CCDC103   | 0.254843081  | 0.000480993 | 0.00600055 | 179 | 181 |
| FAM187A   | 0.254843081  | 0.000480993 | 0.00600055 | 179 | 181 |
| GFAP      | 0.254843081  | 0.000480993 | 0.00600055 | 179 | 181 |
| EFTUD2    | 0.254965411  | 0.000477882 | 0.00597377 | 179 | 181 |
| U3 ENSGOC | 0.255190692  | 0.000472201 | 0.00590573 | 179 | 181 |
| SPANXN1   | 0.256098014  | 0.000449946 | 0.00563024 | 179 | 174 |
| C1QL1     | 0.256304536  | 0.000445018 | 0.00557139 | 179 | 181 |
| DCAKD     | 0.256304536  | 0.000445018 | 0.00557139 | 179 | 181 |
| HRSP12    | 0.256310959  | 0.000444866 | 0.00557139 | 179 | 181 |
| POP1      | 0.256310959  | 0.000444866 | 0.00557139 | 179 | 181 |
| FBX043    | 0.256783069  | 0.000433791 | 0.00544183 | 179 | 181 |
| POLR2K    | 0.256783069  | 0.000433791 | 0.00544183 | 179 | 181 |
| snoU13 EN | -0.256807892 | 0.000433216 | 0.00544012 | 179 | 181 |
| HOXB1     | 0.256931237  | 0.000430368 | 0.0054071  | 179 | 181 |
| PKIA      | 0.257007512  | 0.000428616 | 0.00538782 | 179 | 181 |
| NUP210    | -0.257189615 | 0.00042446  | 0.00533828 | 179 | 179 |
| HDAC11    | -0.257189615 | 0.00042446  | 0.00533828 | 179 | 179 |
| FBLN2     | -0.257189615 | 0.00042446  | 0.00533828 | 179 | 179 |
| MRPL45P2  | 0.257343387  | 0.000420979 | 0.00530258 | 179 | 181 |
| NPEPPS    | 0.257343387  | 0.000420979 | 0.00530258 | 179 | 181 |
| KPNB1     | 0.257343387  | 0.000420979 | 0.00530258 | 179 | 181 |
| FZD6      | 0.258020954  | 0.000405953 | 0.00512113 | 179 | 180 |
| YWHAZ     | 0.258134365  | 0.000403488 | 0.00509262 | 179 | 180 |
| RN7SL685F | 0.258134365  | 0.000403488 | 0.00509262 | 179 | 180 |
| CNTN3     | -0.258141822 | 0.000403326 | 0.00509262 | 179 | 181 |
| WWP1      | 0.258195048  | 0.000402174 | 0.00508381 | 179 | 182 |
| RMDN1     | 0.258195048  | 0.000402174 | 0.00508381 | 179 | 182 |
| CPNE3     | 0.258195048  | 0.000402174 | 0.00508381 | 179 | 182 |
| RN7SKP189 | 0.258600652  | 0.000393494 | 0.00498172 | 179 | 174 |
| LINC0063C | 0.258709212  | 0.000391201 | 0.00495521 | 179 | 175 |
| RPL30     | 0.258977128  | 0.000385594 | 0.00488669 | 179 | 181 |
| KCNB2     | 0.259010393  | 0.000384903 | 0.00488043 | 179 | 181 |
| SNORA9 EN | 0.25912988   | 0.00038243  | 0.00485156 | 179 | 176 |
| TTLL6     | 0.259486669  | 0.000375135 | 0.00476145 | 179 | 181 |
| CENPI     | 0.259546007  | 0.000373934 | 0.00474864 | 179 | 176 |
| DRP2      | 0.259546007  | 0.000373934 | 0.00474864 | 179 | 176 |
| MSI2      | 0.25955315   | 0.00037379  | 0.00474864 | 179 | 181 |
| PRR11     | 0.261135564  | 0.000343065 | 0.00436333 | 179 | 181 |
| SMG8      | 0.261135564  | 0.000343065 | 0.00436333 | 179 | 181 |
| SLC25A32  | 0.261369098  | 0.000338734 | 0.00431268 | 179 | 180 |
| GRN       | 0.261503534  | 0.000336264 | 0.00428343 | 179 | 181 |
| FAM171A2  | 0.261503534  | 0.000336264 | 0.00428343 | 179 | 181 |
| ITGA2B    | 0.261503534  | 0.000336264 | 0.00428343 | 179 | 181 |

|           |              |             |            |     |     |
|-----------|--------------|-------------|------------|-----|-----|
| GPATCH8   | 0.261503534  | 0.000336264 | 0.00428343 | 179 | 181 |
| RN7SL258F | 0.261503534  | 0.000336264 | 0.00428343 | 179 | 181 |
| SPAG1     | 0.261585778  | 0.000334761 | 0.00427528 | 179 | 181 |
| CTHRC1    | 0.261705261  | 0.000332589 | 0.00424973 | 179 | 180 |
| NSF       | 0.261775163  | 0.000331324 | 0.00423575 | 179 | 181 |
| VEZF1     | 0.261835455  | 0.000330237 | 0.00422403 | 179 | 181 |
| EBLN2     | -0.262206719 | 0.000323615 | 0.00414146 | 179 | 181 |
| snoU13 EN | -0.262206719 | 0.000323615 | 0.00414146 | 179 | 181 |
| PDZRN3    | -0.262206719 | 0.000323615 | 0.00414146 | 179 | 181 |
| ABRA      | 0.262372392  | 0.000320699 | 0.00411053 | 179 | 180 |
| KLF10     | 0.263163573  | 0.000307111 | 0.00393839 | 179 | 180 |
| RN7SKP85  | 0.263708421  | 0.000298066 | 0.00382438 | 179 | 181 |
| PPP1R12C  | -0.264133078 | 0.000291188 | 0.00373807 | 179 | 183 |
| RN7SL437F | 0.264595636  | 0.000283865 | 0.00364595 | 179 | 181 |
| NLRP7     | -0.26473628  | 0.000281672 | 0.00361967 | 179 | 183 |
| NLRP2     | -0.26473628  | 0.000281672 | 0.00361967 | 179 | 183 |
| MIR5680   | 0.265126482  | 0.000275672 | 0.00354623 | 179 | 180 |
| RRM2B     | 0.265250737  | 0.000273786 | 0.0035238  | 179 | 180 |
| UBR5      | 0.265250737  | 0.000273786 | 0.0035238  | 179 | 180 |
| OSR2      | 0.265531779  | 0.000269565 | 0.00347308 | 179 | 181 |
| snoU13 EN | 0.265624466  | 0.000268186 | 0.00345711 | 179 | 180 |
| RNU6ATAC8 | 0.265624466  | 0.000268186 | 0.00345711 | 179 | 180 |
| RGS22     | 0.265677864  | 0.000267394 | 0.0034505  | 179 | 181 |
| MIR599    | 0.265787896  | 0.000265771 | 0.00343133 | 179 | 181 |
| MIR875    | 0.265787896  | 0.000265771 | 0.00343133 | 179 | 181 |
| SNORA72 E | 0.265896836  | 0.000264172 | 0.00341425 | 179 | 181 |
| C8orf47   | 0.265896836  | 0.000264172 | 0.00341425 | 179 | 181 |
| C8orf56   | 0.266033961  | 0.000262172 | 0.00339195 | 179 | 180 |
| BAALC     | 0.266033961  | 0.000262172 | 0.00339195 | 179 | 180 |
| MIR3151   | 0.266033961  | 0.000262172 | 0.00339195 | 179 | 180 |
| RNF19A    | 0.266140816  | 0.000260624 | 0.0033772  | 179 | 181 |
| MIR4471   | 0.266140816  | 0.000260624 | 0.0033772  | 179 | 181 |
| SULF1     | 0.266163933  | 0.00026029  | 0.00337641 | 179 | 181 |
| RNU6ATAC3 | 0.266309182  | 0.000258201 | 0.00335107 | 179 | 181 |
| GOSR2     | 0.266309182  | 0.000258201 | 0.00335107 | 179 | 181 |
| FER1L6    | 0.266451356  | 0.000256172 | 0.00332822 | 179 | 181 |
| STAU2     | 0.266849292  | 0.00025057  | 0.00325715 | 179 | 181 |
| AZIN1     | 0.267064604  | 0.000247587 | 0.00322006 | 179 | 180 |
| OXR1      | 0.267195344  | 0.000245792 | 0.00319839 | 179 | 180 |
| C22orf24  | 0.26720944   | 0.000245599 | 0.00319756 | 179 | 181 |
| YWHAH     | 0.26720944   | 0.000245599 | 0.00319756 | 179 | 181 |
| snoU13 EN | 0.26720944   | 0.000245599 | 0.00319756 | 179 | 181 |
| RN7SL305F | 0.26720944   | 0.000245599 | 0.00319756 | 179 | 181 |
| HOXB13    | 0.267284928  | 0.000244569 | 0.00319086 | 179 | 181 |
| MIR3185   | 0.267284928  | 0.000244569 | 0.00319086 | 179 | 181 |
| PRAC      | 0.267284928  | 0.000244569 | 0.00319086 | 179 | 181 |
| RN7SL125F | 0.267284928  | 0.000244569 | 0.00319086 | 179 | 181 |
| HOXB4     | 0.267487205  | 0.000241828 | 0.00316176 | 179 | 181 |
| MIR10A    | 0.267487205  | 0.000241828 | 0.00316176 | 179 | 181 |
| HOXB5     | 0.267487205  | 0.000241828 | 0.00316176 | 179 | 181 |
| HOXB6     | 0.267487205  | 0.000241828 | 0.00316176 | 179 | 181 |

|           |             |             |            |     |     |
|-----------|-------------|-------------|------------|-----|-----|
| HOXB7     | 0.267487205 | 0.000241828 | 0.00316176 | 179 | 181 |
| HOXB8     | 0.267487205 | 0.000241828 | 0.00316176 | 179 | 181 |
| HOXB9     | 0.267487205 | 0.000241828 | 0.00316176 | 179 | 181 |
| MIR196A1  | 0.267487205 | 0.000241828 | 0.00316176 | 179 | 181 |
| RPL7      | 0.267662246 | 0.000239479 | 0.00314432 | 179 | 181 |
| RDH10     | 0.267662246 | 0.000239479 | 0.00314432 | 179 | 181 |
| DYNLL2    | 0.267726574 | 0.000238621 | 0.00313638 | 179 | 181 |
| OR4D1     | 0.267726574 | 0.000238621 | 0.00313638 | 179 | 181 |
| MATN2     | 0.267727901 | 0.000238604 | 0.00313638 | 179 | 181 |
| LY96      | 0.26793002  | 0.000235927 | 0.00310591 | 179 | 181 |
| GJC1      | 0.267968911 | 0.000235415 | 0.00310082 | 179 | 181 |
| HIGD1B    | 0.267968911 | 0.000235415 | 0.00310082 | 179 | 181 |
| ATP6V1C1  | 0.268366874 | 0.000230237 | 0.00303585 | 179 | 180 |
| RN7SL350F | 0.269130243 | 0.0002206   | 0.00291032 | 179 | 181 |
| NCALD     | 0.269247959 | 0.000219148 | 0.00289271 | 179 | 180 |
| snoU13 EN | 0.269247959 | 0.000219148 | 0.00289271 | 179 | 180 |
| SRSF1     | 0.269303382 | 0.000218467 | 0.0028868  | 179 | 181 |
| HOXB2     | 0.269380902 | 0.000217519 | 0.00287579 | 179 | 181 |
| HOXB3     | 0.269380902 | 0.000217519 | 0.00287579 | 179 | 181 |
| SNORD77 E | 0.270102866 | 0.000208865 | 0.00276434 | 179 | 181 |
| MIR1273A  | 0.270102866 | 0.000208865 | 0.00276434 | 179 | 181 |
| GDAP1     | 0.270133246 | 0.000208508 | 0.00276257 | 179 | 181 |
| MIR301A   | 0.270203078 | 0.00020769  | 0.00275319 | 179 | 181 |
| RN7SKP94  | 0.270372438 | 0.000205717 | 0.00272851 | 179 | 181 |
| MRPS23    | 0.270372438 | 0.000205717 | 0.00272851 | 179 | 181 |
| CUEDC1    | 0.270372438 | 0.000205717 | 0.00272851 | 179 | 181 |
| DCSTAMP   | 0.270655219 | 0.000202462 | 0.00268966 | 179 | 180 |
| ACBD4     | 0.27172285  | 0.000190602 | 0.00253345 | 179 | 181 |
| HEXIM1    | 0.27172285  | 0.000190602 | 0.00253345 | 179 | 181 |
| UBE2W     | 0.271883058 | 0.000188879 | 0.00251325 | 179 | 181 |
| TCEB1     | 0.271883058 | 0.000188879 | 0.00251325 | 179 | 181 |
| TMEM70    | 0.271883058 | 0.000188879 | 0.00251325 | 179 | 181 |
| JPH1      | 0.27225521  | 0.000184933 | 0.00246471 | 179 | 181 |
| PI15      | 0.272430384 | 0.000183102 | 0.00244162 | 179 | 181 |
| TERF1     | 0.272669042 | 0.000180635 | 0.00241002 | 179 | 181 |
| RN7SL449F | 0.272742947 | 0.000179877 | 0.00240121 | 179 | 181 |
| MYC       | 0.273022953 | 0.000177033 | 0.00236452 | 179 | 181 |
| HEXIM2    | 0.273185986 | 0.000175397 | 0.00234392 | 179 | 181 |
| PVT1      | 0.274021445 | 0.00016723  | 0.00223599 | 179 | 181 |
| CDC27     | 0.27418752  | 0.00016565  | 0.00221606 | 179 | 181 |
| ARHGAP27  | 0.274218561 | 0.000165356 | 0.00221332 | 179 | 181 |
| LARGE     | 0.27426899  | 0.000164879 | 0.00220814 | 179 | 181 |
| TATDN1    | 0.274715574 | 0.000160716 | 0.00215354 | 179 | 181 |
| NDUFB9    | 0.274715574 | 0.000160716 | 0.00215354 | 179 | 181 |
| RNA5SP27E | 0.275175811 | 0.000156529 | 0.0020997  | 179 | 180 |
| RSPO2     | 0.275175811 | 0.000156529 | 0.0020997  | 179 | 180 |
| OR4D2     | 0.275356323 | 0.000154914 | 0.0020803  | 179 | 181 |
| TRMT12    | 0.275728879 | 0.000151631 | 0.00203732 | 179 | 181 |
| ITGB3     | 0.275931786 | 0.00014987  | 0.00201475 | 179 | 181 |
| EFCAB13   | 0.275931786 | 0.00014987  | 0.00201475 | 179 | 181 |
| RAD51C    | 0.276347538 | 0.000146322 | 0.00196919 | 179 | 181 |

|           |             |             |            |     |     |
|-----------|-------------|-------------|------------|-----|-----|
| SBSPON    | 0.276388981 | 0.000145973 | 0.00196556 | 179 | 181 |
| RN7SL716F | 0.276835897 | 0.000142255 | 0.00191653 | 179 | 181 |
| TRIM37    | 0.276835897 | 0.000142255 | 0.00191653 | 179 | 181 |
| SKA2      | 0.276835897 | 0.000142255 | 0.00191653 | 179 | 181 |
| MIR454    | 0.276835897 | 0.000142255 | 0.00191653 | 179 | 181 |
| PPM1E     | 0.276893691 | 0.00014178  | 0.00191431 | 179 | 181 |
| MTSS1     | 0.277436665 | 0.000137396 | 0.00185612 | 179 | 181 |
| TMEM65    | 0.277509869 | 0.000136815 | 0.00184927 | 179 | 181 |
| RNF139    | 0.277569589 | 0.000136342 | 0.00184389 | 179 | 181 |
| snoU13 EN | 0.278644083 | 0.000128096 | 0.00173332 | 179 | 181 |
| RNA5SP272 | 0.278738075 | 0.000127397 | 0.00172481 | 179 | 182 |
| DPYS      | 0.278958146 | 0.000125775 | 0.00170378 | 179 | 180 |
| C17orf47  | 0.279640426 | 0.000120868 | 0.0016382  | 179 | 181 |
| MIR4662B  | 0.280091198 | 0.000117725 | 0.00159648 | 179 | 181 |
| WNT3      | 0.280234371 | 0.000116743 | 0.00158402 | 179 | 181 |
| WNT9B     | 0.280234371 | 0.000116743 | 0.00158402 | 179 | 181 |
| MIR548A3  | 0.280367679 | 0.000115835 | 0.00157343 | 179 | 180 |
| LRP12     | 0.280367679 | 0.000115835 | 0.00157343 | 179 | 180 |
| LAPTM4B   | 0.280404105 | 0.000115589 | 0.0015718  | 179 | 181 |
| TMEM75    | 0.280971229 | 0.000111808 | 0.00152123 | 179 | 181 |
| EIF3E     | 0.28157638  | 0.000107902 | 0.00146889 | 179 | 180 |
| EMC2      | 0.28157638  | 0.000107902 | 0.00146889 | 179 | 180 |
| TMEM74    | 0.28157638  | 0.000107902 | 0.00146889 | 179 | 180 |
| SLC5A1    | 0.282639833 | 0.000101345 | 0.00138191 | 179 | 181 |
| AP1B1P1   | 0.282639833 | 0.000101345 | 0.00138191 | 179 | 181 |
| C22orf42  | 0.282639833 | 0.000101345 | 0.00138191 | 179 | 181 |
| SQLE      | 0.283072317 | 9.88E-05    | 0.00134925 | 179 | 181 |
| KIAA0196  | 0.283072317 | 9.88E-05    | 0.00134925 | 179 | 181 |
| CALCOCO2  | 0.28327733  | 9.76E-05    | 0.00133445 | 179 | 181 |
| PLCD3     | 0.283329689 | 9.73E-05    | 0.00133106 | 179 | 181 |
| ARL17A    | 0.283795544 | 9.46E-05    | 0.00129552 | 179 | 181 |
| ARL17B    | 0.283795544 | 9.46E-05    | 0.00129552 | 179 | 181 |
| CRHR1     | 0.283795544 | 9.46E-05    | 0.00129552 | 179 | 181 |
| FAM215B   | 0.283795544 | 9.46E-05    | 0.00129552 | 179 | 181 |
| KANSL1    | 0.283795544 | 9.46E-05    | 0.00129552 | 179 | 181 |
| LRRC37A2  | 0.283795544 | 9.46E-05    | 0.00129552 | 179 | 181 |
| LRRC37A4F | 0.283795544 | 9.46E-05    | 0.00129552 | 179 | 181 |
| LRRC37A   | 0.283795544 | 9.46E-05    | 0.00129552 | 179 | 181 |
| MAPT      | 0.283795544 | 9.46E-05    | 0.00129552 | 179 | 181 |
| PLEKHM1   | 0.283795544 | 9.46E-05    | 0.00129552 | 179 | 181 |
| RN7SL199F | 0.283795544 | 9.46E-05    | 0.00129552 | 179 | 181 |
| RN7SL656F | 0.283795544 | 9.46E-05    | 0.00129552 | 179 | 181 |
| RN7SL730F | 0.283795544 | 9.46E-05    | 0.00129552 | 179 | 181 |
| RN7SL739F | 0.283795544 | 9.46E-05    | 0.00129552 | 179 | 181 |
| SPPL2C    | 0.283795544 | 9.46E-05    | 0.00129552 | 179 | 181 |
| STH       | 0.283795544 | 9.46E-05    | 0.00129552 | 179 | 181 |
| SUPT4H1   | 0.284760343 | 8.94E-05    | 0.00123423 | 179 | 181 |
| RNF43     | 0.284760343 | 8.94E-05    | 0.00123423 | 179 | 181 |
| CRISPLD1  | 0.284916537 | 8.85E-05    | 0.00122417 | 179 | 181 |
| PCAT2     | 0.284918512 | 8.85E-05    | 0.00122417 | 179 | 181 |
| MYL4      | 0.284958292 | 8.83E-05    | 0.00122249 | 179 | 181 |

|           |             |          |            |     |     |
|-----------|-------------|----------|------------|-----|-----|
| snoU13 EN | 0.284958292 | 8.83E-05 | 0.00122249 | 179 | 181 |
| ZFHX4     | 0.285044163 | 8.79E-05 | 0.00121761 | 179 | 181 |
| PEX2      | 0.285044163 | 8.79E-05 | 0.00121761 | 179 | 181 |
| ZNF572    | 0.285144198 | 8.73E-05 | 0.00121173 | 179 | 181 |
| C17orf104 | 0.285306912 | 8.65E-05 | 0.0012007  | 179 | 181 |
| CCDC43    | 0.285306912 | 8.65E-05 | 0.0012007  | 179 | 181 |
| DBF4B     | 0.285306912 | 8.65E-05 | 0.0012007  | 179 | 181 |
| RN7SL819F | 0.285306912 | 8.65E-05 | 0.0012007  | 179 | 181 |
| ADAM11    | 0.285306912 | 8.65E-05 | 0.0012007  | 179 | 181 |
| HSF5      | 0.285580053 | 8.51E-05 | 0.00118459 | 179 | 181 |
| MTMR4     | 0.285580053 | 8.51E-05 | 0.00118459 | 179 | 181 |
| SEPT4     | 0.285580053 | 8.51E-05 | 0.00118459 | 179 | 181 |
| MMP16     | 0.285788935 | 8.41E-05 | 0.00117188 | 179 | 182 |
| ZFPM2     | 0.28603889  | 8.28E-05 | 0.00115514 | 179 | 180 |
| LINC00964 | 0.286386202 | 8.11E-05 | 0.00113201 | 179 | 181 |
| TSPYL5    | 0.287410638 | 7.63E-05 | 0.0010651  | 179 | 181 |
| U3 ENSGOC | 0.287410638 | 7.63E-05 | 0.0010651  | 179 | 181 |
| PCAT1     | 0.287662781 | 7.51E-05 | 0.00105025 | 179 | 181 |
| snoU13 EN | 0.288432346 | 7.17E-05 | 0.0010032  | 179 | 180 |
| NUDCD1    | 0.288544282 | 7.12E-05 | 0.00099701 | 179 | 180 |
| ENY2      | 0.288544282 | 7.12E-05 | 0.00099701 | 179 | 180 |
| WDYHV1    | 0.288577374 | 7.11E-05 | 0.00099614 | 179 | 181 |
| EPX       | 0.289374218 | 6.77E-05 | 0.00094981 | 179 | 181 |
| MKS1      | 0.289374218 | 6.77E-05 | 0.00094981 | 179 | 181 |
| MIR142    | 0.289693047 | 6.64E-05 | 0.00093268 | 179 | 181 |
| MIR4736   | 0.289693047 | 6.64E-05 | 0.00093268 | 179 | 181 |
| LPO       | 0.289848127 | 6.58E-05 | 0.00092499 | 179 | 181 |
| MPO       | 0.289848127 | 6.58E-05 | 0.00092499 | 179 | 181 |
| BZRAP1    | 0.289848127 | 6.58E-05 | 0.00092499 | 179 | 181 |
| PKHD1L1   | 0.290261696 | 6.42E-05 | 0.00090359 | 179 | 180 |
| EBAG9     | 0.290261696 | 6.42E-05 | 0.00090359 | 179 | 180 |
| SNORD112  | 0.290261696 | 6.42E-05 | 0.00090359 | 179 | 180 |
| TRHR      | 0.290549698 | 6.31E-05 | 0.00088942 | 179 | 180 |
| FBXO32    | 0.290802402 | 6.21E-05 | 0.00087634 | 179 | 181 |
| POM121L9F | 0.291737684 | 5.87E-05 | 0.0008282  | 179 | 183 |
| CASC9     | 0.292267793 | 5.68E-05 | 0.00080223 | 179 | 181 |
| HNF4G     | 0.292267793 | 5.68E-05 | 0.00080223 | 179 | 181 |
| SPECC1L   | 0.292418677 | 5.63E-05 | 0.00079576 | 179 | 183 |
| TRPS1     | 0.292779119 | 5.50E-05 | 0.00077881 | 179 | 181 |
| RN7SKP15E | 0.293197918 | 5.36E-05 | 0.00075947 | 179 | 181 |
| KLHL38    | 0.293197918 | 5.36E-05 | 0.00075947 | 179 | 181 |
| ANXA13    | 0.293197918 | 5.36E-05 | 0.00075947 | 179 | 181 |
| FAM91A1   | 0.293197918 | 5.36E-05 | 0.00075947 | 179 | 181 |
| RNA5SP443 | 0.293911659 | 5.13E-05 | 0.00072851 | 179 | 181 |
| MIR1205   | 0.294659413 | 4.90E-05 | 0.00069606 | 179 | 181 |
| OSGIN2    | 0.296230709 | 4.45E-05 | 0.00063185 | 179 | 181 |
| FLJ27365  | 0.296329135 | 4.42E-05 | 0.00062835 | 179 | 183 |
| MIR3619   | 0.297864501 | 4.02E-05 | 0.00057133 | 179 | 183 |
| DECR1     | 0.297881655 | 4.01E-05 | 0.00057104 | 179 | 181 |
| CALB1     | 0.29848477  | 3.86E-05 | 0.0005502  | 179 | 181 |
| GRAMD4    | 0.299087642 | 3.72E-05 | 0.00053009 | 179 | 183 |

|           |             |          |            |     |     |
|-----------|-------------|----------|------------|-----|-----|
| MTDH      | 0.299655797 | 3.59E-05 | 0.00051178 | 179 | 181 |
| RN7SL20P  | 0.299748841 | 3.57E-05 | 0.00050909 | 179 | 181 |
| TRIB1     | 0.300010981 | 3.51E-05 | 0.00050104 | 179 | 181 |
| RN7SL590F | 0.300010981 | 3.51E-05 | 0.00050104 | 179 | 181 |
| DEPDC5    | 0.300031064 | 3.51E-05 | 0.00050098 | 179 | 181 |
| MIR1207   | 0.30031522  | 3.44E-05 | 0.00049237 | 179 | 181 |
| ATAD2     | 0.300318053 | 3.44E-05 | 0.00049237 | 179 | 181 |
| MIR548AA1 | 0.300318053 | 3.44E-05 | 0.00049237 | 179 | 181 |
| TAF2      | 0.300574605 | 3.39E-05 | 0.00048522 | 179 | 181 |
| DSCC1     | 0.300574605 | 3.39E-05 | 0.00048522 | 179 | 181 |
| RN7SL396F | 0.300574605 | 3.39E-05 | 0.00048522 | 179 | 181 |
| RNA5SP277 | 0.300574605 | 3.39E-05 | 0.00048522 | 179 | 181 |
| NSMCE2    | 0.300900035 | 3.32E-05 | 0.00047644 | 179 | 181 |
| LINC0053E | 0.30158179  | 3.18E-05 | 0.00045659 | 179 | 181 |
| MIR2053   | 0.302052711 | 3.09E-05 | 0.00044341 | 179 | 180 |
| RN7SL329F | 0.30247152  | 3.00E-05 | 0.00043201 | 179 | 181 |
| snoU13 EN | 0.302856851 | 2.93E-05 | 0.00042179 | 179 | 180 |
| RIPK2     | 0.303018511 | 2.90E-05 | 0.00041772 | 179 | 182 |
| COX6C     | 0.303553343 | 2.80E-05 | 0.00040394 | 179 | 181 |
| CCDC26    | 0.303835394 | 2.75E-05 | 0.00039696 | 179 | 181 |
| MRPL13    | 0.304244113 | 2.68E-05 | 0.00038695 | 179 | 181 |
| DEPTOR    | 0.304384114 | 2.66E-05 | 0.00038372 | 179 | 181 |
| NFAM1     | 0.304522357 | 2.64E-05 | 0.00038056 | 179 | 182 |
| POLDIP3   | 0.304522357 | 2.64E-05 | 0.00038056 | 179 | 182 |
| RN7SKP80  | 0.304522357 | 2.64E-05 | 0.00038056 | 179 | 182 |
| RRP7A     | 0.304522357 | 2.64E-05 | 0.00038056 | 179 | 182 |
| RRP7B     | 0.304522357 | 2.64E-05 | 0.00038056 | 179 | 182 |
| SERHL2    | 0.304522357 | 2.64E-05 | 0.00038056 | 179 | 182 |
| SERHL     | 0.304522357 | 2.64E-05 | 0.00038056 | 179 | 182 |
| RN7SKP20E | 0.305205091 | 2.52E-05 | 0.00036574 | 179 | 181 |
| COLEC10   | 0.305218257 | 2.52E-05 | 0.00036565 | 179 | 181 |
| COL14A1   | 0.305607061 | 2.46E-05 | 0.00035683 | 179 | 181 |
| RNA5SP27E | 0.305709161 | 2.44E-05 | 0.00035471 | 179 | 181 |
| CABIN1    | 0.306253338 | 2.36E-05 | 0.00034269 | 179 | 183 |
| SYBU      | 0.306258783 | 2.36E-05 | 0.00034269 | 179 | 180 |
| TTC28     | 0.306365739 | 2.34E-05 | 0.00034062 | 179 | 182 |
| EIF3H     | 0.306750396 | 2.28E-05 | 0.00033246 | 179 | 181 |
| CELSR1    | 0.3069746   | 2.25E-05 | 0.00032787 | 179 | 183 |
| ADRBK2    | 0.307281089 | 2.21E-05 | 0.00032162 | 179 | 183 |
| RNA5SP494 | 0.307281089 | 2.21E-05 | 0.00032162 | 179 | 183 |
| ENPP2     | 0.307384524 | 2.19E-05 | 0.00031986 | 179 | 181 |
| PPARA     | 0.307484142 | 2.18E-05 | 0.00031799 | 179 | 183 |
| MYO18B    | 0.307520781 | 2.17E-05 | 0.00031742 | 179 | 183 |
| RN7SKP16E | 0.307520781 | 2.17E-05 | 0.00031742 | 179 | 183 |
| NBN       | 0.3078615   | 2.13E-05 | 0.00031085 | 179 | 181 |
| LINC00977 | 0.30793967  | 2.11E-05 | 0.00030947 | 179 | 181 |
| UTP23     | 0.308296354 | 2.07E-05 | 0.00030256 | 179 | 181 |
| RAD21     | 0.308885841 | 1.99E-05 | 0.00029136 | 179 | 181 |
| MIR3610   | 0.308885841 | 1.99E-05 | 0.00029136 | 179 | 181 |
| AARD      | 0.308885841 | 1.99E-05 | 0.00029136 | 179 | 181 |
| KCNV1     | 0.309017433 | 1.97E-05 | 0.00028939 | 179 | 180 |

|           |             |          |            |     |     |
|-----------|-------------|----------|------------|-----|-----|
| DERL1     | 0.309745326 | 1.88E-05 | 0.00027614 | 179 | 181 |
| RNY4P5    | 0.309745326 | 1.88E-05 | 0.00027614 | 179 | 181 |
| TBC1D31   | 0.309745326 | 1.88E-05 | 0.00027614 | 179 | 181 |
| U3 ENSGOC | 0.309745326 | 1.88E-05 | 0.00027614 | 179 | 181 |
| FBX07     | 0.310173557 | 1.83E-05 | 0.00026916 | 179 | 181 |
| TNFRSF11E | 0.310278017 | 1.82E-05 | 0.00026748 | 179 | 181 |
| EIF4ENIF1 | 0.310315483 | 1.81E-05 | 0.00026699 | 179 | 181 |
| TBC1D22A  | 0.310449304 | 1.80E-05 | 0.00026482 | 179 | 183 |
| SLC2A11   | 0.310534016 | 1.79E-05 | 0.00026351 | 179 | 183 |
| RN7SL268F | 0.310534016 | 1.79E-05 | 0.00026351 | 179 | 183 |
| MIF       | 0.310534016 | 1.79E-05 | 0.00026351 | 179 | 183 |
| RFPL2     | 0.310775419 | 1.76E-05 | 0.00025984 | 179 | 181 |
| SLC5A4    | 0.310775419 | 1.76E-05 | 0.00025984 | 179 | 181 |
| TTLL1     | 0.311012221 | 1.73E-05 | 0.00025614 | 179 | 183 |
| BIK       | 0.311012221 | 1.73E-05 | 0.00025614 | 179 | 183 |
| MCAT      | 0.311012221 | 1.73E-05 | 0.00025614 | 179 | 183 |
| TSPO      | 0.311012221 | 1.73E-05 | 0.00025614 | 179 | 183 |
| TTLL12    | 0.311012221 | 1.73E-05 | 0.00025614 | 179 | 183 |
| SCUBE1    | 0.311012221 | 1.73E-05 | 0.00025614 | 179 | 183 |
| RFPL3     | 0.311039491 | 1.73E-05 | 0.00025614 | 179 | 181 |
| RFPL3S    | 0.311039491 | 1.73E-05 | 0.00025614 | 179 | 181 |
| RTCB      | 0.311039491 | 1.73E-05 | 0.00025614 | 179 | 181 |
| BPIFC     | 0.311039491 | 1.73E-05 | 0.00025614 | 179 | 181 |
| MTERFD1   | 0.311142201 | 1.72E-05 | 0.00025549 | 179 | 181 |
| UQCRB     | 0.311142201 | 1.72E-05 | 0.00025549 | 179 | 181 |
| PTDSS1    | 0.311173988 | 1.71E-05 | 0.00025527 | 179 | 181 |
| CPQ       | 0.311274675 | 1.70E-05 | 0.00025374 | 179 | 181 |
| DRG1      | 0.31161345  | 1.66E-05 | 0.0002483  | 179 | 182 |
| RN7SKP153 | 0.31164867  | 1.66E-05 | 0.00024788 | 179 | 181 |
| GDF6      | 0.311813561 | 1.64E-05 | 0.00024535 | 179 | 181 |
| LINC00861 | 0.31184224  | 1.64E-05 | 0.00024504 | 179 | 181 |
| FAM84B    | 0.312149986 | 1.61E-05 | 0.00024027 | 179 | 181 |
| SUSD2     | 0.31279646  | 1.54E-05 | 0.00023038 | 179 | 183 |
| GGT5      | 0.31279646  | 1.54E-05 | 0.00023038 | 179 | 183 |
| COL22A1   | 0.312811088 | 1.54E-05 | 0.00023038 | 179 | 182 |
| C22orf43  | 0.312893895 | 1.53E-05 | 0.00022932 | 179 | 183 |
| GUSBP11   | 0.312893895 | 1.53E-05 | 0.00022932 | 179 | 183 |
| IGLL1     | 0.312893895 | 1.53E-05 | 0.00022932 | 179 | 183 |
| RGL4      | 0.312893895 | 1.53E-05 | 0.00022932 | 179 | 183 |
| VPREB3    | 0.312893895 | 1.53E-05 | 0.00022932 | 179 | 183 |
| ZNF70     | 0.312893895 | 1.53E-05 | 0.00022932 | 179 | 183 |
| C22orf15  | 0.312893895 | 1.53E-05 | 0.00022932 | 179 | 183 |
| CHCHD10   | 0.312893895 | 1.53E-05 | 0.00022932 | 179 | 183 |
| MMP11     | 0.312893895 | 1.53E-05 | 0.00022932 | 179 | 183 |
| SMARCB1   | 0.312893895 | 1.53E-05 | 0.00022932 | 179 | 183 |
| DERL3     | 0.312893895 | 1.53E-05 | 0.00022932 | 179 | 183 |
| SAMD12    | 0.312972125 | 1.52E-05 | 0.00022932 | 179 | 181 |
| MAL2      | 0.313049333 | 1.51E-05 | 0.00022864 | 179 | 181 |
| ADORA2A   | 0.313178856 | 1.50E-05 | 0.00022683 | 179 | 183 |
| MTBP      | 0.313856988 | 1.43E-05 | 0.00021701 | 179 | 181 |
| SNTB1     | 0.313856988 | 1.43E-05 | 0.00021701 | 179 | 181 |

|           |             |          |            |     |     |
|-----------|-------------|----------|------------|-----|-----|
| CHEK2     | 0.314141618 | 1.41E-05 | 0.00021321 | 179 | 182 |
| SNORA76 E | 0.314322165 | 1.39E-05 | 0.0002108  | 179 | 181 |
| BCR       | 0.31446201  | 1.38E-05 | 0.00020898 | 179 | 183 |
| CES5AP1   | 0.31446201  | 1.38E-05 | 0.00020898 | 179 | 183 |
| GGTLC2    | 0.31446201  | 1.38E-05 | 0.00020898 | 179 | 183 |
| GNAZ      | 0.31446201  | 1.38E-05 | 0.00020898 | 179 | 183 |
| IGLC1     | 0.31446201  | 1.38E-05 | 0.00020898 | 179 | 183 |
| IGLC2     | 0.31446201  | 1.38E-05 | 0.00020898 | 179 | 183 |
| IGLC3     | 0.31446201  | 1.38E-05 | 0.00020898 | 179 | 183 |
| IGLC7     | 0.31446201  | 1.38E-05 | 0.00020898 | 179 | 183 |
| IGLJ1     | 0.31446201  | 1.38E-05 | 0.00020898 | 179 | 183 |
| IGLJ2     | 0.31446201  | 1.38E-05 | 0.00020898 | 179 | 183 |
| IGLJ3     | 0.31446201  | 1.38E-05 | 0.00020898 | 179 | 183 |
| IGLJ4     | 0.31446201  | 1.38E-05 | 0.00020898 | 179 | 183 |
| IGLJ5     | 0.31446201  | 1.38E-05 | 0.00020898 | 179 | 183 |
| IGLJ6     | 0.31446201  | 1.38E-05 | 0.00020898 | 179 | 183 |
| IGLJ7     | 0.31446201  | 1.38E-05 | 0.00020898 | 179 | 183 |
| IGLL5     | 0.31446201  | 1.38E-05 | 0.00020898 | 179 | 183 |
| MIR650    | 0.31446201  | 1.38E-05 | 0.00020898 | 179 | 183 |
| POM121L1F | 0.31446201  | 1.38E-05 | 0.00020898 | 179 | 183 |
| PRAMEF24F | 0.31446201  | 1.38E-05 | 0.00020898 | 179 | 183 |
| PRAME     | 0.31446201  | 1.38E-05 | 0.00020898 | 179 | 183 |
| RAB36     | 0.31446201  | 1.38E-05 | 0.00020898 | 179 | 183 |
| RN7SL263F | 0.31446201  | 1.38E-05 | 0.00020898 | 179 | 183 |
| RTDR1     | 0.31446201  | 1.38E-05 | 0.00020898 | 179 | 183 |
| TOP3B     | 0.31446201  | 1.38E-05 | 0.00020898 | 179 | 183 |
| VPREB1    | 0.31446201  | 1.38E-05 | 0.00020898 | 179 | 183 |
| ZDHHC8P1  | 0.31446201  | 1.38E-05 | 0.00020898 | 179 | 183 |
| ZNF280A   | 0.31446201  | 1.38E-05 | 0.00020898 | 179 | 183 |
| ZNF280B   | 0.31446201  | 1.38E-05 | 0.00020898 | 179 | 183 |
| snoU13 EN | 0.31446201  | 1.38E-05 | 0.00020898 | 179 | 183 |
| MIR1208   | 0.314617602 | 1.36E-05 | 0.00020898 | 179 | 181 |
| TFIP11    | 0.314891453 | 1.34E-05 | 0.0002069  | 179 | 183 |
| TPST2     | 0.314891453 | 1.34E-05 | 0.0002069  | 179 | 183 |
| MIR548J   | 0.314891453 | 1.34E-05 | 0.0002069  | 179 | 183 |
| CRYBB1    | 0.314891453 | 1.34E-05 | 0.0002069  | 179 | 183 |
| CRYBA4    | 0.314891453 | 1.34E-05 | 0.0002069  | 179 | 183 |
| SNORA32 E | 0.314891809 | 1.34E-05 | 0.0002069  | 179 | 181 |
| NOV       | 0.314891809 | 1.34E-05 | 0.0002069  | 179 | 181 |
| MIAT      | 0.315175601 | 1.31E-05 | 0.00020391 | 179 | 183 |
| PITPNB    | 0.315241608 | 1.31E-05 | 0.00020315 | 179 | 183 |
| MICAL3    | 0.315364899 | 1.30E-05 | 0.00020161 | 179 | 183 |
| SEZ6L     | 0.315982624 | 1.25E-05 | 0.00019359 | 179 | 183 |
| RNA5SP49E | 0.315982624 | 1.25E-05 | 0.00019359 | 179 | 183 |
| ASPHD2    | 0.315982624 | 1.25E-05 | 0.00019359 | 179 | 183 |
| HPS4      | 0.315982624 | 1.25E-05 | 0.00019359 | 179 | 183 |
| SRRD      | 0.315982624 | 1.25E-05 | 0.00019359 | 179 | 183 |
| SFI1      | 0.316110048 | 1.23E-05 | 0.00019256 | 179 | 181 |
| PISD      | 0.316110048 | 1.23E-05 | 0.00019256 | 179 | 181 |
| PRR14L    | 0.316110048 | 1.23E-05 | 0.00019256 | 179 | 181 |
| C8orf37   | 0.316875724 | 1.17E-05 | 0.00018329 | 179 | 181 |

|           |             |          |            |     |     |
|-----------|-------------|----------|------------|-----|-----|
| CSMD3     | 0.317028804 | 1.16E-05 | 0.00018153 | 179 | 180 |
| ZHX2      | 0.317215057 | 1.15E-05 | 0.00017939 | 179 | 181 |
| FAM83A    | 0.317274776 | 1.14E-05 | 0.00017879 | 179 | 181 |
| MIR4663   | 0.317274776 | 1.14E-05 | 0.00017879 | 179 | 181 |
| C8orf76   | 0.317274776 | 1.14E-05 | 0.00017879 | 179 | 181 |
| ZHX1      | 0.317274776 | 1.14E-05 | 0.00017879 | 179 | 181 |
| snoU13 EN | 0.317274776 | 1.14E-05 | 0.00017879 | 179 | 181 |
| SYN3      | 0.317443293 | 1.13E-05 | 0.00017734 | 179 | 181 |
| TOP1MT    | 0.317617069 | 1.12E-05 | 0.00017539 | 179 | 182 |
| RHPN1     | 0.317617069 | 1.12E-05 | 0.00017539 | 179 | 182 |
| BID       | 0.317796051 | 1.10E-05 | 0.00017352 | 179 | 183 |
| LINC00528 | 0.317796051 | 1.10E-05 | 0.00017352 | 179 | 183 |
| PLEKHF2   | 0.31780472  | 1.10E-05 | 0.00017352 | 179 | 181 |
| C22orf31  | 0.317923655 | 1.09E-05 | 0.00017236 | 179 | 182 |
| MIR4764   | 0.318754867 | 1.03E-05 | 0.00016309 | 179 | 181 |
| snoU13 EN | 0.318910971 | 1.02E-05 | 0.00016148 | 179 | 181 |
| GATSL3    | 0.319028288 | 1.02E-05 | 0.00016031 | 179 | 182 |
| TBC1D10A  | 0.319028288 | 1.02E-05 | 0.00016031 | 179 | 182 |
| SF3A1     | 0.319028288 | 1.02E-05 | 0.00016031 | 179 | 182 |
| CCDC157   | 0.319028288 | 1.02E-05 | 0.00016031 | 179 | 182 |
| RNF215    | 0.319028288 | 1.02E-05 | 0.00016031 | 179 | 182 |
| SEC14L2   | 0.319028288 | 1.02E-05 | 0.00016031 | 179 | 182 |
| KIAA1658  | 0.319028288 | 1.02E-05 | 0.00016031 | 179 | 182 |
| MTFP1     | 0.319028288 | 1.02E-05 | 0.00016031 | 179 | 182 |
| SEC14L3   | 0.319028288 | 1.02E-05 | 0.00016031 | 179 | 182 |
| SEC14L4   | 0.319028288 | 1.02E-05 | 0.00016031 | 179 | 182 |
| OSBP2     | 0.319040656 | 1.01E-05 | 0.00016031 | 179 | 182 |
| MORC2     | 0.319040656 | 1.01E-05 | 0.00016031 | 179 | 182 |
| PACSIN2   | 0.319070495 | 1.01E-05 | 0.00016031 | 179 | 183 |
| CERK      | 0.319081685 | 1.01E-05 | 0.00016031 | 179 | 183 |
| HSCB      | 0.31925532  | 1.00E-05 | 0.00015929 | 179 | 182 |
| RNA5SP497 | 0.319280456 | 9.98E-06 | 0.00015912 | 179 | 181 |
| RNU12     | 0.319419488 | 9.89E-06 | 0.00015774 | 179 | 182 |
| KREMEN1   | 0.319640104 | 9.74E-06 | 0.0001555  | 179 | 182 |
| SDC2      | 0.320146485 | 9.41E-06 | 0.00015036 | 179 | 181 |
| ZNRF3     | 0.320160741 | 9.40E-06 | 0.00015031 | 179 | 182 |
| SNORA25 E | 0.320182568 | 9.39E-06 | 0.00015018 | 179 | 182 |
| NDUFAF6   | 0.320216453 | 9.37E-06 | 0.00014994 | 179 | 181 |
| snoU13 EN | 0.320216453 | 9.37E-06 | 0.00014994 | 179 | 181 |
| TP53INP1  | 0.320216453 | 9.37E-06 | 0.00014994 | 179 | 181 |
| MIR3150B  | 0.320216453 | 9.37E-06 | 0.00014994 | 179 | 181 |
| DPY19L4   | 0.320260915 | 9.34E-06 | 0.00014987 | 179 | 181 |
| MPPED1    | 0.320768166 | 9.02E-06 | 0.00014489 | 179 | 183 |
| SMDT1     | 0.321109781 | 8.82E-06 | 0.00014166 | 179 | 182 |
| CYP2D6    | 0.321109781 | 8.82E-06 | 0.00014166 | 179 | 182 |
| CYP2D7P1  | 0.321109781 | 8.82E-06 | 0.00014166 | 179 | 182 |
| TCF20     | 0.321109781 | 8.82E-06 | 0.00014166 | 179 | 182 |
| SCRIB     | 0.32118899  | 8.77E-06 | 0.00014127 | 179 | 183 |
| MIR937    | 0.32118899  | 8.77E-06 | 0.00014127 | 179 | 183 |
| PUF60     | 0.32118899  | 8.77E-06 | 0.00014127 | 179 | 183 |
| NRBP2     | 0.32118899  | 8.77E-06 | 0.00014127 | 179 | 183 |

|           |             |          |            |     |     |
|-----------|-------------|----------|------------|-----|-----|
| CDPF1     | 0.321263913 | 8.72E-06 | 0.00014091 | 179 | 183 |
| MAPK1     | 0.321268093 | 8.72E-06 | 0.00014091 | 179 | 183 |
| RNA5SP493 | 0.321268093 | 8.72E-06 | 0.00014091 | 179 | 183 |
| MN1       | 0.321304712 | 8.70E-06 | 0.0001408  | 179 | 183 |
| RN7SL162F | 0.321338907 | 8.68E-06 | 0.00014056 | 179 | 182 |
| CRYBB3    | 0.321882624 | 8.36E-06 | 0.00013554 | 179 | 183 |
| CRYBB2    | 0.321882624 | 8.36E-06 | 0.00013554 | 179 | 183 |
| CRYBB2P1  | 0.321882624 | 8.36E-06 | 0.00013554 | 179 | 183 |
| LRP5L     | 0.321882624 | 8.36E-06 | 0.00013554 | 179 | 183 |
| MIR4763   | 0.322242541 | 8.16E-06 | 0.0001326  | 179 | 183 |
| MIRLET7A3 | 0.322242541 | 8.16E-06 | 0.0001326  | 179 | 183 |
| MIRLET7B  | 0.322242541 | 8.16E-06 | 0.0001326  | 179 | 183 |
| RN7SL228F | 0.322300521 | 8.13E-06 | 0.00013234 | 179 | 181 |
| HORMAD2   | 0.322585617 | 7.97E-06 | 0.00012987 | 179 | 182 |
| MIR3686   | 0.322761839 | 7.88E-06 | 0.0001284  | 179 | 181 |
| VPS13B    | 0.322945563 | 7.78E-06 | 0.00012688 | 179 | 181 |
| RN7SKP226 | 0.323130634 | 7.68E-06 | 0.00012536 | 179 | 181 |
| NECAB1    | 0.323477101 | 7.50E-06 | 0.0001225  | 179 | 181 |
| TMEM55A   | 0.323477101 | 7.50E-06 | 0.0001225  | 179 | 181 |
| OTUD6B    | 0.323477101 | 7.50E-06 | 0.0001225  | 179 | 181 |
| RN7SL777F | 0.323477101 | 7.50E-06 | 0.0001225  | 179 | 181 |
| LRRC69    | 0.323574385 | 7.45E-06 | 0.00012201 | 179 | 181 |
| MIR4661   | 0.323574385 | 7.45E-06 | 0.00012201 | 179 | 181 |
| SLC26A7   | 0.323574385 | 7.45E-06 | 0.00012201 | 179 | 181 |
| UPB1      | 0.323721247 | 7.38E-06 | 0.00012102 | 179 | 183 |
| DDTL      | 0.323792681 | 7.34E-06 | 0.00012051 | 179 | 183 |
| DDT       | 0.323792681 | 7.34E-06 | 0.00012051 | 179 | 183 |
| GSTT1     | 0.323792681 | 7.34E-06 | 0.00012051 | 179 | 183 |
| GSTT2B    | 0.323792681 | 7.34E-06 | 0.00012051 | 179 | 183 |
| GSTT2     | 0.323792681 | 7.34E-06 | 0.00012051 | 179 | 183 |
| GSTTP2    | 0.323792681 | 7.34E-06 | 0.00012051 | 179 | 183 |
| TUBA8     | 0.32382111  | 7.33E-06 | 0.00012051 | 179 | 183 |
| GUCD1     | 0.324475445 | 7.00E-06 | 0.00011552 | 179 | 183 |
| SNRPD3    | 0.324475445 | 7.00E-06 | 0.00011552 | 179 | 183 |
| FAM211B   | 0.324475445 | 7.00E-06 | 0.00011552 | 179 | 183 |
| GGT1      | 0.324475445 | 7.00E-06 | 0.00011552 | 179 | 183 |
| PIWIL3    | 0.324475445 | 7.00E-06 | 0.00011552 | 179 | 183 |
| SGSM1     | 0.324475445 | 7.00E-06 | 0.00011552 | 179 | 183 |
| SNORD56 E | 0.324475445 | 7.00E-06 | 0.00011552 | 179 | 183 |
| TMEM211   | 0.324475445 | 7.00E-06 | 0.00011552 | 179 | 183 |
| ASAP1     | 0.325052736 | 6.73E-06 | 0.00011161 | 179 | 181 |
| PPM1F     | 0.325077611 | 6.72E-06 | 0.0001115  | 179 | 183 |
| AIFM3     | 0.325099597 | 6.71E-06 | 0.0001114  | 179 | 183 |
| ARVCF     | 0.325099597 | 6.71E-06 | 0.0001114  | 179 | 183 |
| BCRP2     | 0.325099597 | 6.71E-06 | 0.0001114  | 179 | 183 |
| C22orf29  | 0.325099597 | 6.71E-06 | 0.0001114  | 179 | 183 |
| C22orf39  | 0.325099597 | 6.71E-06 | 0.0001114  | 179 | 183 |
| CCDC116   | 0.325099597 | 6.71E-06 | 0.0001114  | 179 | 183 |
| CDC45     | 0.325099597 | 6.71E-06 | 0.0001114  | 179 | 183 |
| CLDN5     | 0.325099597 | 6.71E-06 | 0.0001114  | 179 | 183 |
| CLTCL1    | 0.325099597 | 6.71E-06 | 0.0001114  | 179 | 183 |

|           |             |          |           |     |     |
|-----------|-------------|----------|-----------|-----|-----|
| COMT      | 0.325099597 | 6.71E-06 | 0.0001114 | 179 | 183 |
| CRKL      | 0.325099597 | 6.71E-06 | 0.0001114 | 179 | 183 |
| DGCR14    | 0.325099597 | 6.71E-06 | 0.0001114 | 179 | 183 |
| DGCR2     | 0.325099597 | 6.71E-06 | 0.0001114 | 179 | 183 |
| DGCR5     | 0.325099597 | 6.71E-06 | 0.0001114 | 179 | 183 |
| DGCR6L    | 0.325099597 | 6.71E-06 | 0.0001114 | 179 | 183 |
| DGCR6     | 0.325099597 | 6.71E-06 | 0.0001114 | 179 | 183 |
| DGCR8     | 0.325099597 | 6.71E-06 | 0.0001114 | 179 | 183 |
| FAM230A   | 0.325099597 | 6.71E-06 | 0.0001114 | 179 | 183 |
| FAM230B   | 0.325099597 | 6.71E-06 | 0.0001114 | 179 | 183 |
| FAM230C   | 0.325099597 | 6.71E-06 | 0.0001114 | 179 | 183 |
| GGT2      | 0.325099597 | 6.71E-06 | 0.0001114 | 179 | 183 |
| GGT3P     | 0.325099597 | 6.71E-06 | 0.0001114 | 179 | 183 |
| GGTLC3    | 0.325099597 | 6.71E-06 | 0.0001114 | 179 | 183 |
| GNB1L     | 0.325099597 | 6.71E-06 | 0.0001114 | 179 | 183 |
| GP1BB     | 0.325099597 | 6.71E-06 | 0.0001114 | 179 | 183 |
| GSC2      | 0.325099597 | 6.71E-06 | 0.0001114 | 179 | 183 |
| HIC2      | 0.325099597 | 6.71E-06 | 0.0001114 | 179 | 183 |
| HIRA      | 0.325099597 | 6.71E-06 | 0.0001114 | 179 | 183 |
| KLHL22    | 0.325099597 | 6.71E-06 | 0.0001114 | 179 | 183 |
| LZTR1     | 0.325099597 | 6.71E-06 | 0.0001114 | 179 | 183 |
| MED15     | 0.325099597 | 6.71E-06 | 0.0001114 | 179 | 183 |
| MIR1286   | 0.325099597 | 6.71E-06 | 0.0001114 | 179 | 183 |
| MIR1306   | 0.325099597 | 6.71E-06 | 0.0001114 | 179 | 183 |
| MIR130B   | 0.325099597 | 6.71E-06 | 0.0001114 | 179 | 183 |
| MIR185    | 0.325099597 | 6.71E-06 | 0.0001114 | 179 | 183 |
| MIR301B   | 0.325099597 | 6.71E-06 | 0.0001114 | 179 | 183 |
| MIR3618   | 0.325099597 | 6.71E-06 | 0.0001114 | 179 | 183 |
| MIR4761   | 0.325099597 | 6.71E-06 | 0.0001114 | 179 | 183 |
| MIR649    | 0.325099597 | 6.71E-06 | 0.0001114 | 179 | 183 |
| MRPL40    | 0.325099597 | 6.71E-06 | 0.0001114 | 179 | 183 |
| P2RX6P    | 0.325099597 | 6.71E-06 | 0.0001114 | 179 | 183 |
| P2RX6     | 0.325099597 | 6.71E-06 | 0.0001114 | 179 | 183 |
| PI4KAP1   | 0.325099597 | 6.71E-06 | 0.0001114 | 179 | 183 |
| PI4KAP2   | 0.325099597 | 6.71E-06 | 0.0001114 | 179 | 183 |
| PI4KA     | 0.325099597 | 6.71E-06 | 0.0001114 | 179 | 183 |
| POM121L4F | 0.325099597 | 6.71E-06 | 0.0001114 | 179 | 183 |
| POM121L7  | 0.325099597 | 6.71E-06 | 0.0001114 | 179 | 183 |
| PPIL2     | 0.325099597 | 6.71E-06 | 0.0001114 | 179 | 183 |
| PRODH     | 0.325099597 | 6.71E-06 | 0.0001114 | 179 | 183 |
| RANBP1    | 0.325099597 | 6.71E-06 | 0.0001114 | 179 | 183 |
| RIMBP3B   | 0.325099597 | 6.71E-06 | 0.0001114 | 179 | 183 |
| RIMBP3C   | 0.325099597 | 6.71E-06 | 0.0001114 | 179 | 183 |
| RIMBP3    | 0.325099597 | 6.71E-06 | 0.0001114 | 179 | 183 |
| RN7SKP131 | 0.325099597 | 6.71E-06 | 0.0001114 | 179 | 183 |
| RN7SKP221 | 0.325099597 | 6.71E-06 | 0.0001114 | 179 | 183 |
| RN7SKP63  | 0.325099597 | 6.71E-06 | 0.0001114 | 179 | 183 |
| RN7SL168F | 0.325099597 | 6.71E-06 | 0.0001114 | 179 | 183 |
| RN7SL280F | 0.325099597 | 6.71E-06 | 0.0001114 | 179 | 183 |
| RN7SL389F | 0.325099597 | 6.71E-06 | 0.0001114 | 179 | 183 |
| RN7SL812F | 0.325099597 | 6.71E-06 | 0.0001114 | 179 | 183 |

|           |             |          |            |     |     |
|-----------|-------------|----------|------------|-----|-----|
| RTN4R     | 0.325099597 | 6.71E-06 | 0.0001114  | 179 | 183 |
| SCARF2    | 0.325099597 | 6.71E-06 | 0.0001114  | 179 | 183 |
| SCARNA17  | 0.325099597 | 6.71E-06 | 0.0001114  | 179 | 183 |
| SCARNA17  | 0.325099597 | 6.71E-06 | 0.0001114  | 179 | 183 |
| SCARNA17  | 0.325099597 | 6.71E-06 | 0.0001114  | 179 | 183 |
| SCARNA18  | 0.325099597 | 6.71E-06 | 0.0001114  | 179 | 183 |
| SCARNA18  | 0.325099597 | 6.71E-06 | 0.0001114  | 179 | 183 |
| SCARNA18  | 0.325099597 | 6.71E-06 | 0.0001114  | 179 | 183 |
| SDF2L1    | 0.325099597 | 6.71E-06 | 0.0001114  | 179 | 183 |
| SEPT5     | 0.325099597 | 6.71E-06 | 0.0001114  | 179 | 183 |
| SERPIND1  | 0.325099597 | 6.71E-06 | 0.0001114  | 179 | 183 |
| SLC25A1   | 0.325099597 | 6.71E-06 | 0.0001114  | 179 | 183 |
| SLC7A4    | 0.325099597 | 6.71E-06 | 0.0001114  | 179 | 183 |
| SMPD4P1   | 0.325099597 | 6.71E-06 | 0.0001114  | 179 | 183 |
| SNAP29    | 0.325099597 | 6.71E-06 | 0.0001114  | 179 | 183 |
| SNORA15 E | 0.325099597 | 6.71E-06 | 0.0001114  | 179 | 183 |
| SNORA77 E | 0.325099597 | 6.71E-06 | 0.0001114  | 179 | 183 |
| TANGO2    | 0.325099597 | 6.71E-06 | 0.0001114  | 179 | 183 |
| TBX1      | 0.325099597 | 6.71E-06 | 0.0001114  | 179 | 183 |
| THAP7     | 0.325099597 | 6.71E-06 | 0.0001114  | 179 | 183 |
| TMEM191A  | 0.325099597 | 6.71E-06 | 0.0001114  | 179 | 183 |
| TMEM191C  | 0.325099597 | 6.71E-06 | 0.0001114  | 179 | 183 |
| TRMT2A    | 0.325099597 | 6.71E-06 | 0.0001114  | 179 | 183 |
| TSSK2     | 0.325099597 | 6.71E-06 | 0.0001114  | 179 | 183 |
| TUBA3FP   | 0.325099597 | 6.71E-06 | 0.0001114  | 179 | 183 |
| TXNRD2    | 0.325099597 | 6.71E-06 | 0.0001114  | 179 | 183 |
| UBE2L3    | 0.325099597 | 6.71E-06 | 0.0001114  | 179 | 183 |
| UFD1L     | 0.325099597 | 6.71E-06 | 0.0001114  | 179 | 183 |
| USP18     | 0.325099597 | 6.71E-06 | 0.0001114  | 179 | 183 |
| USP41     | 0.325099597 | 6.71E-06 | 0.0001114  | 179 | 183 |
| YDJC      | 0.325099597 | 6.71E-06 | 0.0001114  | 179 | 183 |
| YPEL1     | 0.325099597 | 6.71E-06 | 0.0001114  | 179 | 183 |
| ZDHHC8    | 0.325099597 | 6.71E-06 | 0.0001114  | 179 | 183 |
| ZNF74     | 0.325099597 | 6.71E-06 | 0.0001114  | 179 | 183 |
| snoU13 EN | 0.325099597 | 6.71E-06 | 0.0001114  | 179 | 183 |
| snoU13 EN | 0.325099597 | 6.71E-06 | 0.0001114  | 179 | 183 |
| snoU13 EN | 0.325099597 | 6.71E-06 | 0.0001114  | 179 | 183 |
| MIR648    | 0.325203961 | 6.66E-06 | 0.0001114  | 179 | 183 |
| PEX26     | 0.325499354 | 6.53E-06 | 0.0001114  | 179 | 183 |
| PKDREJ    | 0.325886388 | 6.35E-06 | 0.0001114  | 179 | 183 |
| TTC38     | 0.325886388 | 6.35E-06 | 0.0001114  | 179 | 183 |
| GTSE1     | 0.325886388 | 6.35E-06 | 0.0001114  | 179 | 183 |
| RUNX1T1   | 0.32591563  | 6.34E-06 | 0.0001114  | 179 | 181 |
| HAS2      | 0.326056416 | 6.28E-06 | 0.0001114  | 179 | 181 |
| KIAA1671  | 0.326304591 | 6.17E-06 | 0.00011018 | 179 | 183 |
| TRMU      | 0.326328504 | 6.16E-06 | 0.00011007 | 179 | 183 |
| FAM92A1   | 0.32645214  | 6.11E-06 | 0.00010921 | 179 | 181 |
| RBM12B    | 0.32645214  | 6.11E-06 | 0.00010921 | 179 | 181 |
| TMEM67    | 0.32645214  | 6.11E-06 | 0.00010921 | 179 | 181 |
| PDP1      | 0.32645214  | 6.11E-06 | 0.00010921 | 179 | 181 |
| MIR378D2  | 0.32645214  | 6.11E-06 | 0.00010921 | 179 | 181 |

|           |             |          |            |     |     |
|-----------|-------------|----------|------------|-----|-----|
| CDH17     | 0.32645904  | 6.11E-06 | 0.00010921 | 179 | 181 |
| GEM       | 0.32645904  | 6.11E-06 | 0.00010921 | 179 | 181 |
| RN7SL757F | 0.326608652 | 6.04E-06 | 0.00010858 | 179 | 182 |
| SNORD42 E | 0.326608652 | 6.04E-06 | 0.00010858 | 179 | 182 |
| INTS8     | 0.326792311 | 5.97E-06 | 0.00010737 | 179 | 181 |
| CCNE2     | 0.326792311 | 5.97E-06 | 0.00010737 | 179 | 181 |
| NUP50     | 0.326871758 | 5.93E-06 | 0.00010693 | 179 | 183 |
| SNORA40 E | 0.326891189 | 5.93E-06 | 0.00010686 | 179 | 182 |
| CCDC117   | 0.327060242 | 5.86E-06 | 0.00010569 | 179 | 182 |
| XBP1      | 0.327060242 | 5.86E-06 | 0.00010569 | 179 | 182 |
| ST3GAL1   | 0.327148858 | 5.82E-06 | 0.0001052  | 179 | 182 |
| ESRP1     | 0.327382919 | 5.73E-06 | 0.00010358 | 179 | 181 |
| GPIHBP1   | 0.327828248 | 5.55E-06 | 0.00010049 | 179 | 182 |
| ZC3H3     | 0.328234889 | 5.40E-06 | 9.78E-05   | 179 | 183 |
| snoU13 EN | 0.328467016 | 5.31E-06 | 9.63E-05   | 179 | 181 |
| RN7SKP231 | 0.328467016 | 5.31E-06 | 9.63E-05   | 179 | 181 |
| SULT4A1   | 0.328490766 | 5.30E-06 | 9.62E-05   | 179 | 183 |
| PNPLA5    | 0.328490766 | 5.30E-06 | 9.62E-05   | 179 | 183 |
| RN7SL633F | 0.328838487 | 5.17E-06 | 9.41E-05   | 179 | 182 |
| SMTN      | 0.328838487 | 5.17E-06 | 9.41E-05   | 179 | 182 |
| INPP5J    | 0.328838487 | 5.17E-06 | 9.41E-05   | 179 | 182 |
| PLA2G3    | 0.328838487 | 5.17E-06 | 9.41E-05   | 179 | 182 |
| MIR3928   | 0.328838487 | 5.17E-06 | 9.41E-05   | 179 | 182 |
| RNF185    | 0.328838487 | 5.17E-06 | 9.41E-05   | 179 | 182 |
| LIMK2     | 0.328838487 | 5.17E-06 | 9.41E-05   | 179 | 182 |
| PIK3IP1   | 0.328838487 | 5.17E-06 | 9.41E-05   | 179 | 182 |
| RNA5SP49C | 0.328838487 | 5.17E-06 | 9.41E-05   | 179 | 182 |
| PATZ1     | 0.328838487 | 5.17E-06 | 9.41E-05   | 179 | 182 |
| PNPLA3    | 0.329103371 | 5.08E-06 | 9.30E-05   | 179 | 183 |
| SAMM50    | 0.329103371 | 5.08E-06 | 9.30E-05   | 179 | 183 |
| CABP7     | 0.329290558 | 5.01E-06 | 9.19E-05   | 179 | 182 |
| ZMAT5     | 0.329290558 | 5.01E-06 | 9.19E-05   | 179 | 182 |
| UQCR10    | 0.329290558 | 5.01E-06 | 9.19E-05   | 179 | 182 |
| ASCC2     | 0.329290558 | 5.01E-06 | 9.19E-05   | 179 | 182 |
| MTMR3     | 0.329290558 | 5.01E-06 | 9.19E-05   | 179 | 182 |
| TUG1      | 0.329621581 | 4.90E-06 | 9.02E-05   | 179 | 182 |
| snoU13 EN | 0.329624159 | 4.90E-06 | 9.02E-05   | 179 | 183 |
| TIMP3     | 0.330121804 | 4.73E-06 | 8.72E-05   | 179 | 181 |
| LINC00898 | 0.330195962 | 4.71E-06 | 8.68E-05   | 179 | 183 |
| GSDMC     | 0.330216526 | 4.70E-06 | 8.67E-05   | 179 | 181 |
| MAFA      | 0.330590584 | 4.58E-06 | 8.46E-05   | 179 | 182 |
| EPPK1     | 0.330778733 | 4.52E-06 | 8.35E-05   | 179 | 183 |
| PARP10    | 0.330874091 | 4.49E-06 | 8.30E-05   | 179 | 183 |
| AP1B1     | 0.330978111 | 4.45E-06 | 8.25E-05   | 179 | 182 |
| RFPL1S    | 0.330978111 | 4.45E-06 | 8.25E-05   | 179 | 182 |
| RFPL1     | 0.330978111 | 4.45E-06 | 8.25E-05   | 179 | 182 |
| NEFH      | 0.330978111 | 4.45E-06 | 8.25E-05   | 179 | 182 |
| LIF       | 0.331207035 | 4.38E-06 | 8.14E-05   | 179 | 182 |
| MGC20647  | 0.331207035 | 4.38E-06 | 8.14E-05   | 179 | 182 |
| OSM       | 0.331207035 | 4.38E-06 | 8.14E-05   | 179 | 182 |
| KIAA0930  | 0.331232397 | 4.37E-06 | 8.14E-05   | 179 | 183 |

|           |             |          |          |     |     |
|-----------|-------------|----------|----------|-----|-----|
| MIR1249   | 0.331232397 | 4.37E-06 | 8.14E-05 | 179 | 183 |
| GRINA     | 0.331422    | 4.32E-06 | 8.05E-05 | 179 | 183 |
| SPATC1    | 0.331422    | 4.32E-06 | 8.05E-05 | 179 | 183 |
| LY6E      | 0.331513502 | 4.29E-06 | 8.01E-05 | 179 | 182 |
| C8orf31   | 0.331513502 | 4.29E-06 | 8.01E-05 | 179 | 182 |
| SEC14L6   | 0.33154416  | 4.28E-06 | 8.00E-05 | 179 | 182 |
| GAL3ST1   | 0.331595211 | 4.26E-06 | 7.98E-05 | 179 | 182 |
| PES1      | 0.331595211 | 4.26E-06 | 7.98E-05 | 179 | 182 |
| TCN2      | 0.331595211 | 4.26E-06 | 7.98E-05 | 179 | 182 |
| SLC35E4   | 0.331595211 | 4.26E-06 | 7.98E-05 | 179 | 182 |
| DUSP18    | 0.331595211 | 4.26E-06 | 7.98E-05 | 179 | 182 |
| MIR3200   | 0.331595211 | 4.26E-06 | 7.98E-05 | 179 | 182 |
| FSBP      | 0.332125784 | 4.11E-06 | 7.72E-05 | 179 | 181 |
| RAD54B    | 0.332125784 | 4.11E-06 | 7.72E-05 | 179 | 181 |
| KIAA1429  | 0.332125784 | 4.11E-06 | 7.72E-05 | 179 | 181 |
| PARVB     | 0.332229166 | 4.08E-06 | 7.68E-05 | 179 | 183 |
| XPNPEP3   | 0.332428871 | 4.02E-06 | 7.58E-05 | 179 | 181 |
| UPK3A     | 0.332753156 | 3.93E-06 | 7.41E-05 | 179 | 183 |
| FAM118A   | 0.332753156 | 3.93E-06 | 7.41E-05 | 179 | 183 |
| ADCY8     | 0.332916262 | 3.88E-06 | 7.34E-05 | 179 | 181 |
| ZFP41     | 0.333099915 | 3.83E-06 | 7.25E-05 | 179 | 182 |
| GLI4      | 0.333099915 | 3.83E-06 | 7.25E-05 | 179 | 182 |
| ZNF696    | 0.333099915 | 3.83E-06 | 7.25E-05 | 179 | 182 |
| MED30     | 0.333104249 | 3.83E-06 | 7.25E-05 | 179 | 181 |
| ARFGAP3   | 0.333555676 | 3.71E-06 | 7.04E-05 | 179 | 182 |
| WISP1     | 0.333607207 | 3.70E-06 | 7.02E-05 | 179 | 182 |
| NDRG1     | 0.333607207 | 3.70E-06 | 7.02E-05 | 179 | 182 |
| MIR151A   | 0.333642364 | 3.69E-06 | 7.01E-05 | 179 | 182 |
| PTK2      | 0.333642364 | 3.69E-06 | 7.01E-05 | 179 | 182 |
| RNA5SP278 | 0.333642364 | 3.69E-06 | 7.01E-05 | 179 | 182 |
| ARC       | 0.333730498 | 3.67E-06 | 6.99E-05 | 179 | 182 |
| JRK       | 0.333730498 | 3.67E-06 | 6.99E-05 | 179 | 182 |
| PSCA      | 0.333730498 | 3.67E-06 | 6.99E-05 | 179 | 182 |
| LY6K      | 0.333730498 | 3.67E-06 | 6.99E-05 | 179 | 182 |
| THEM6     | 0.333730498 | 3.67E-06 | 6.99E-05 | 179 | 182 |
| SLURP1    | 0.333730498 | 3.67E-06 | 6.99E-05 | 179 | 182 |
| LYPD2     | 0.333730498 | 3.67E-06 | 6.99E-05 | 179 | 182 |
| LY6D      | 0.333730498 | 3.67E-06 | 6.99E-05 | 179 | 182 |
| LYNX1     | 0.333730498 | 3.67E-06 | 6.99E-05 | 179 | 182 |
| GML       | 0.333775127 | 3.65E-06 | 6.99E-05 | 179 | 182 |
| CYP11B1   | 0.333775127 | 3.65E-06 | 6.99E-05 | 179 | 182 |
| CYP11B2   | 0.333775127 | 3.65E-06 | 6.99E-05 | 179 | 182 |
| THOC5     | 0.334014327 | 3.59E-06 | 6.91E-05 | 179 | 182 |
| GPR20     | 0.334021388 | 3.59E-06 | 6.91E-05 | 179 | 182 |
| LINC00051 | 0.334021388 | 3.59E-06 | 6.91E-05 | 179 | 182 |
| MROH5     | 0.334021388 | 3.59E-06 | 6.91E-05 | 179 | 182 |
| PTP4A3    | 0.334021388 | 3.59E-06 | 6.91E-05 | 179 | 182 |
| SNORD5 EN | 0.334021388 | 3.59E-06 | 6.91E-05 | 179 | 182 |
| TSNARE1   | 0.334021388 | 3.59E-06 | 6.91E-05 | 179 | 182 |
| LINC00534 | 0.334117709 | 3.57E-06 | 6.90E-05 | 179 | 181 |
| RNA5SP273 | 0.334234258 | 3.54E-06 | 6.84E-05 | 179 | 181 |

|           |             |          |          |     |     |
|-----------|-------------|----------|----------|-----|-----|
| LDOC1L    | 0.334237152 | 3.54E-06 | 6.84E-05 | 179 | 183 |
| LINC00207 | 0.334237152 | 3.54E-06 | 6.84E-05 | 179 | 183 |
| LINC00229 | 0.334237152 | 3.54E-06 | 6.84E-05 | 179 | 183 |
| PRR5      | 0.334237152 | 3.54E-06 | 6.84E-05 | 179 | 183 |
| ARHGAP8   | 0.334237152 | 3.54E-06 | 6.84E-05 | 179 | 183 |
| TG        | 0.334332507 | 3.51E-06 | 6.83E-05 | 179 | 182 |
| FAM135B   | 0.334468963 | 3.48E-06 | 6.77E-05 | 179 | 182 |
| PHF21B    | 0.334522264 | 3.46E-06 | 6.75E-05 | 179 | 183 |
| 7SK ENSGC | 0.334686486 | 3.42E-06 | 6.67E-05 | 179 | 183 |
| GSDMD     | 0.334686486 | 3.42E-06 | 6.67E-05 | 179 | 183 |
| MROH6     | 0.334686486 | 3.42E-06 | 6.67E-05 | 179 | 183 |
| EEF1D     | 0.334686486 | 3.42E-06 | 6.67E-05 | 179 | 183 |
| NAPRT1    | 0.334686486 | 3.42E-06 | 6.67E-05 | 179 | 183 |
| TIGD5     | 0.334686486 | 3.42E-06 | 6.67E-05 | 179 | 183 |
| PYCRL     | 0.334686486 | 3.42E-06 | 6.67E-05 | 179 | 183 |
| TSTA3     | 0.334686486 | 3.42E-06 | 6.67E-05 | 179 | 183 |
| ZNF623    | 0.334686486 | 3.42E-06 | 6.67E-05 | 179 | 183 |
| CYB5R3    | 0.33469131  | 3.42E-06 | 6.67E-05 | 179 | 182 |
| ATP5L2    | 0.33469131  | 3.42E-06 | 6.67E-05 | 179 | 182 |
| A4GALT    | 0.33469131  | 3.42E-06 | 6.67E-05 | 179 | 182 |
| KIAA1644  | 0.334797101 | 3.40E-06 | 6.67E-05 | 179 | 183 |
| PARVG     | 0.334819255 | 3.39E-06 | 6.67E-05 | 179 | 183 |
| BAI1      | 0.335087664 | 3.33E-06 | 6.56E-05 | 179 | 182 |
| EMID1     | 0.335579552 | 3.21E-06 | 6.34E-05 | 179 | 182 |
| RHBDD3    | 0.335579552 | 3.21E-06 | 6.34E-05 | 179 | 182 |
| EWSR1     | 0.335579552 | 3.21E-06 | 6.34E-05 | 179 | 182 |
| GAS2L1    | 0.335579552 | 3.21E-06 | 6.34E-05 | 179 | 182 |
| RASL10A   | 0.335579552 | 3.21E-06 | 6.34E-05 | 179 | 182 |
| SNORD125  | 0.335579552 | 3.21E-06 | 6.34E-05 | 179 | 182 |
| FAM203A   | 0.335688066 | 3.19E-06 | 6.32E-05 | 179 | 183 |
| MROH1     | 0.335688066 | 3.19E-06 | 6.32E-05 | 179 | 183 |
| MIR3201   | 0.335913641 | 3.14E-06 | 6.23E-05 | 179 | 183 |
| SREBF2    | 0.336058918 | 3.10E-06 | 6.17E-05 | 179 | 182 |
| CENPM     | 0.336058918 | 3.10E-06 | 6.17E-05 | 179 | 182 |
| LINC00634 | 0.336058918 | 3.10E-06 | 6.17E-05 | 179 | 182 |
| MIR33A    | 0.336058918 | 3.10E-06 | 6.17E-05 | 179 | 182 |
| MIR378I   | 0.336058918 | 3.10E-06 | 6.17E-05 | 179 | 182 |
| SEPT3     | 0.336058918 | 3.10E-06 | 6.17E-05 | 179 | 182 |
| SHISA8    | 0.336058918 | 3.10E-06 | 6.17E-05 | 179 | 182 |
| TNFRSF13C | 0.336058918 | 3.10E-06 | 6.17E-05 | 179 | 182 |
| WBP2NL    | 0.336058918 | 3.10E-06 | 6.17E-05 | 179 | 182 |
| NAGA      | 0.336058918 | 3.10E-06 | 6.17E-05 | 179 | 182 |
| FAM109B   | 0.336058918 | 3.10E-06 | 6.17E-05 | 179 | 182 |
| snoU13 EN | 0.336058918 | 3.10E-06 | 6.17E-05 | 179 | 182 |
| NDUFA6    | 0.336058918 | 3.10E-06 | 6.17E-05 | 179 | 182 |
| DENND3    | 0.336129217 | 3.09E-06 | 6.17E-05 | 179 | 182 |
| MIR4535   | 0.336465113 | 3.01E-06 | 6.06E-05 | 179 | 183 |
| ACR       | 0.336465113 | 3.01E-06 | 6.06E-05 | 179 | 183 |
| ADM2      | 0.336465113 | 3.01E-06 | 6.06E-05 | 179 | 183 |
| ALG12     | 0.336465113 | 3.01E-06 | 6.06E-05 | 179 | 183 |
| ARSA      | 0.336465113 | 3.01E-06 | 6.06E-05 | 179 | 183 |

|             |             |          |          |     |     |
|-------------|-------------|----------|----------|-----|-----|
| BRD1        | 0.336465113 | 3.01E-06 | 6.06E-05 | 179 | 183 |
| C22orf34    | 0.336465113 | 3.01E-06 | 6.06E-05 | 179 | 183 |
| CHKB        | 0.336465113 | 3.01E-06 | 6.06E-05 | 179 | 183 |
| CPT1B       | 0.336465113 | 3.01E-06 | 6.06E-05 | 179 | 183 |
| CRELD2      | 0.336465113 | 3.01E-06 | 6.06E-05 | 179 | 183 |
| DENND6B     | 0.336465113 | 3.01E-06 | 6.06E-05 | 179 | 183 |
| HDAC10      | 0.336465113 | 3.01E-06 | 6.06E-05 | 179 | 183 |
| IL17REL     | 0.336465113 | 3.01E-06 | 6.06E-05 | 179 | 183 |
| KLHDC7B     | 0.336465113 | 3.01E-06 | 6.06E-05 | 179 | 183 |
| LMF2        | 0.336465113 | 3.01E-06 | 6.06E-05 | 179 | 183 |
| MAPK11      | 0.336465113 | 3.01E-06 | 6.06E-05 | 179 | 183 |
| MAPK12      | 0.336465113 | 3.01E-06 | 6.06E-05 | 179 | 183 |
| MAPK8IP2    | 0.336465113 | 3.01E-06 | 6.06E-05 | 179 | 183 |
| MIOX        | 0.336465113 | 3.01E-06 | 6.06E-05 | 179 | 183 |
| MIR3667     | 0.336465113 | 3.01E-06 | 6.06E-05 | 179 | 183 |
| MLC1        | 0.336465113 | 3.01E-06 | 6.06E-05 | 179 | 183 |
| MOV10L1     | 0.336465113 | 3.01E-06 | 6.06E-05 | 179 | 183 |
| NCAPH2      | 0.336465113 | 3.01E-06 | 6.06E-05 | 179 | 183 |
| ODF3B       | 0.336465113 | 3.01E-06 | 6.06E-05 | 179 | 183 |
| PANX2       | 0.336465113 | 3.01E-06 | 6.06E-05 | 179 | 183 |
| PIM3        | 0.336465113 | 3.01E-06 | 6.06E-05 | 179 | 183 |
| PLXNB2      | 0.336465113 | 3.01E-06 | 6.06E-05 | 179 | 183 |
| PPP6R2      | 0.336465113 | 3.01E-06 | 6.06E-05 | 179 | 183 |
| RABL2B      | 0.336465113 | 3.01E-06 | 6.06E-05 | 179 | 183 |
| RN7SKP252   | 0.336465113 | 3.01E-06 | 6.06E-05 | 179 | 183 |
| RN7SL500F   | 0.336465113 | 3.01E-06 | 6.06E-05 | 179 | 183 |
| SBF1        | 0.336465113 | 3.01E-06 | 6.06E-05 | 179 | 183 |
| SCO2        | 0.336465113 | 3.01E-06 | 6.06E-05 | 179 | 183 |
| SHANK3      | 0.336465113 | 3.01E-06 | 6.06E-05 | 179 | 183 |
| SYCE3       | 0.336465113 | 3.01E-06 | 6.06E-05 | 179 | 183 |
| TRABD       | 0.336465113 | 3.01E-06 | 6.06E-05 | 179 | 183 |
| TTLL8       | 0.336465113 | 3.01E-06 | 6.06E-05 | 179 | 183 |
| TUBGCP6     | 0.336465113 | 3.01E-06 | 6.06E-05 | 179 | 183 |
| TYMP        | 0.336465113 | 3.01E-06 | 6.06E-05 | 179 | 183 |
| ZBED4       | 0.336465113 | 3.01E-06 | 6.06E-05 | 179 | 183 |
| LY6H        | 0.336606975 | 2.98E-06 | 6.06E-05 | 179 | 182 |
| TMEM64      | 0.33681952  | 2.94E-06 | 6.06E-05 | 179 | 181 |
| ACO2        | 0.338229848 | 2.66E-06 | 5.52E-05 | 179 | 182 |
| SNORA25   E | 0.338290205 | 2.64E-06 | 5.50E-05 | 179 | 181 |
| SLC30A8     | 0.338437243 | 2.62E-06 | 5.45E-05 | 179 | 181 |
| RN7SL826F   | 0.338437243 | 2.62E-06 | 5.45E-05 | 179 | 181 |
| SNORA31   E | 0.338437243 | 2.62E-06 | 5.45E-05 | 179 | 181 |
| FAM19A5     | 0.338438732 | 2.62E-06 | 5.45E-05 | 179 | 183 |
| TEF         | 0.338550762 | 2.59E-06 | 5.42E-05 | 179 | 182 |
| PHF20L1     | 0.338959305 | 2.52E-06 | 5.27E-05 | 179 | 182 |
| MIR5194     | 0.339191766 | 2.48E-06 | 5.19E-05 | 179 | 181 |
| TMEM71      | 0.339295467 | 2.46E-06 | 5.15E-05 | 179 | 182 |
| MIR30B      | 0.339557952 | 2.41E-06 | 5.06E-05 | 179 | 182 |
| MIR30D      | 0.339557952 | 2.41E-06 | 5.06E-05 | 179 | 182 |
| PLEC        | 0.339565158 | 2.41E-06 | 5.06E-05 | 179 | 183 |
| MIR661      | 0.339565158 | 2.41E-06 | 5.06E-05 | 179 | 183 |

|           |             |          |          |     |     |
|-----------|-------------|----------|----------|-----|-----|
| CCDC166   | 0.339610429 | 2.40E-06 | 5.06E-05 | 179 | 183 |
| FAM83H    | 0.339610429 | 2.40E-06 | 5.06E-05 | 179 | 183 |
| MAPK15    | 0.339610429 | 2.40E-06 | 5.06E-05 | 179 | 183 |
| MIR4664   | 0.339610429 | 2.40E-06 | 5.06E-05 | 179 | 183 |
| ZNF707    | 0.339610429 | 2.40E-06 | 5.06E-05 | 179 | 183 |
| KCNK9     | 0.339717673 | 2.38E-06 | 5.04E-05 | 179 | 182 |
| C8orf87   | 0.339998122 | 2.34E-06 | 4.94E-05 | 179 | 181 |
| OPLAH     | 0.340017704 | 2.33E-06 | 4.94E-05 | 179 | 183 |
| EXOSC4    | 0.340017704 | 2.33E-06 | 4.94E-05 | 179 | 183 |
| GPAA1     | 0.340017704 | 2.33E-06 | 4.94E-05 | 179 | 183 |
| CYC1      | 0.340017704 | 2.33E-06 | 4.94E-05 | 179 | 183 |
| SHARPIN   | 0.340017704 | 2.33E-06 | 4.94E-05 | 179 | 183 |
| KIAA1875  | 0.340017704 | 2.33E-06 | 4.94E-05 | 179 | 183 |
| MAF1      | 0.340017704 | 2.33E-06 | 4.94E-05 | 179 | 183 |
| EXT1      | 0.34019639  | 2.30E-06 | 4.90E-05 | 179 | 181 |
| RNA5SP274 | 0.340390149 | 2.27E-06 | 4.84E-05 | 179 | 181 |
| EFCAB6    | 0.340449254 | 2.26E-06 | 4.82E-05 | 179 | 183 |
| KHDRBS3   | 0.340869687 | 2.19E-06 | 4.68E-05 | 179 | 182 |
| FBLN1     | 0.341426918 | 2.10E-06 | 4.50E-05 | 179 | 183 |
| FAM49B    | 0.342060233 | 2.01E-06 | 4.30E-05 | 179 | 181 |
| LINC0053E | 0.342212547 | 1.99E-06 | 4.26E-05 | 179 | 181 |
| WNT7B     | 0.342523058 | 1.94E-06 | 4.16E-05 | 179 | 183 |
| SLC45A4   | 0.342618376 | 1.93E-06 | 4.14E-05 | 179 | 182 |
| SMC1B     | 0.342795648 | 1.90E-06 | 4.09E-05 | 179 | 183 |
| RIBC2     | 0.342795648 | 1.90E-06 | 4.09E-05 | 179 | 183 |
| LINC0089C | 0.342995034 | 1.88E-06 | 4.04E-05 | 179 | 183 |
| C22orf26  | 0.342995034 | 1.88E-06 | 4.04E-05 | 179 | 183 |
| C8orf17   | 0.343202413 | 1.85E-06 | 3.98E-05 | 179 | 182 |
| ATXN10    | 0.343227169 | 1.84E-06 | 3.98E-05 | 179 | 183 |
| MIR4762   | 0.343227169 | 1.84E-06 | 3.98E-05 | 179 | 183 |
| NIPSNAP1  | 0.343242897 | 1.84E-06 | 3.98E-05 | 179 | 182 |
| NF2       | 0.343242897 | 1.84E-06 | 3.98E-05 | 179 | 182 |
| TRAPPC9   | 0.343937977 | 1.75E-06 | 3.79E-05 | 179 | 182 |
| SNORA12 E | 0.344152323 | 1.72E-06 | 3.73E-05 | 179 | 181 |
| SLA       | 0.344250721 | 1.71E-06 | 3.71E-05 | 179 | 182 |
| AGO2      | 0.344328078 | 1.70E-06 | 3.69E-05 | 179 | 182 |
| TRIQK     | 0.345035723 | 1.61E-06 | 3.51E-05 | 179 | 181 |
| MEI1      | 0.345343206 | 1.58E-06 | 3.43E-05 | 179 | 182 |
| CCDC134   | 0.345343206 | 1.58E-06 | 3.43E-05 | 179 | 182 |
| SLC25A17  | 0.345565412 | 1.55E-06 | 3.38E-05 | 179 | 181 |
| MIR4766   | 0.345565412 | 1.55E-06 | 3.38E-05 | 179 | 181 |
| ST13      | 0.346390891 | 1.46E-06 | 3.18E-05 | 179 | 181 |
| DNAJB7    | 0.346390891 | 1.46E-06 | 3.18E-05 | 179 | 181 |
| TOB2      | 0.347270771 | 1.37E-06 | 2.99E-05 | 179 | 182 |
| MCHR1     | 0.347389749 | 1.36E-06 | 2.96E-05 | 179 | 181 |
| RBFOX2    | 0.347502152 | 1.34E-06 | 2.94E-05 | 179 | 181 |
| HPYR1     | 0.348628214 | 1.24E-06 | 2.71E-05 | 179 | 182 |
| LRRC6     | 0.348628214 | 1.24E-06 | 2.71E-05 | 179 | 182 |
| EFR3A     | 0.349146592 | 1.19E-06 | 2.61E-05 | 179 | 182 |
| OC90      | 0.349146592 | 1.19E-06 | 2.61E-05 | 179 | 182 |
| HHLA1     | 0.349146592 | 1.19E-06 | 2.61E-05 | 179 | 182 |

|           |             |          |          |     |     |
|-----------|-------------|----------|----------|-----|-----|
| KCNQ3     | 0.349146592 | 1.19E-06 | 2.61E-05 | 179 | 182 |
| ZFAT      | 0.349374079 | 1.17E-06 | 2.57E-05 | 179 | 182 |
| CECR2     | 0.349425901 | 1.16E-06 | 2.57E-05 | 179 | 183 |
| CCT8L2    | 0.349609875 | 1.15E-06 | 2.53E-05 | 179 | 183 |
| HSFY1P1   | 0.349609875 | 1.15E-06 | 2.53E-05 | 179 | 183 |
| KCNMB3P1  | 0.349609875 | 1.15E-06 | 2.53E-05 | 179 | 183 |
| OR11H1    | 0.349609875 | 1.15E-06 | 2.53E-05 | 179 | 183 |
| POTEH     | 0.349609875 | 1.15E-06 | 2.53E-05 | 179 | 183 |
| TPTEP1    | 0.349609875 | 1.15E-06 | 2.53E-05 | 179 | 183 |
| XKR3      | 0.349609875 | 1.15E-06 | 2.53E-05 | 179 | 183 |
| GAB4      | 0.349609875 | 1.15E-06 | 2.53E-05 | 179 | 183 |
| CECR7     | 0.349609875 | 1.15E-06 | 2.53E-05 | 179 | 183 |
| IL17RA    | 0.349609875 | 1.15E-06 | 2.53E-05 | 179 | 183 |
| CECR6     | 0.349609875 | 1.15E-06 | 2.53E-05 | 179 | 183 |
| CECR5     | 0.349609875 | 1.15E-06 | 2.53E-05 | 179 | 183 |
| CECR1     | 0.349609875 | 1.15E-06 | 2.53E-05 | 179 | 183 |
| CECR3     | 0.349609875 | 1.15E-06 | 2.53E-05 | 179 | 183 |
| CECR9     | 0.349609875 | 1.15E-06 | 2.53E-05 | 179 | 183 |
| RN7SL843F | 0.349609875 | 1.15E-06 | 2.53E-05 | 179 | 183 |
| ELFN2     | 0.349712888 | 1.14E-06 | 2.53E-05 | 179 | 181 |
| SNORA72 E | 0.350786296 | 1.05E-06 | 2.35E-05 | 179 | 181 |
| CYTH4     | 0.350793621 | 1.05E-06 | 2.35E-05 | 179 | 181 |
| POLR3H    | 0.351442297 | 1.00E-06 | 2.24E-05 | 179 | 182 |
| SLC25A18  | 0.356011391 | 7.06E-07 | 1.59E-05 | 179 | 183 |
| ATP6V1E1  | 0.356011391 | 7.06E-07 | 1.59E-05 | 179 | 183 |
| BCL2L13   | 0.356011391 | 7.06E-07 | 1.59E-05 | 179 | 183 |
| MAFF      | 0.357217163 | 6.43E-07 | 1.45E-05 | 179 | 181 |
| ADCK5     | 0.357962344 | 6.07E-07 | 1.37E-05 | 179 | 183 |
| ARHGAP39  | 0.357962344 | 6.07E-07 | 1.37E-05 | 179 | 183 |
| BOP1      | 0.357962344 | 6.07E-07 | 1.37E-05 | 179 | 183 |
| C8orf33   | 0.357962344 | 6.07E-07 | 1.37E-05 | 179 | 183 |
| C8orf82   | 0.357962344 | 6.07E-07 | 1.37E-05 | 179 | 183 |
| COMMD5    | 0.357962344 | 6.07E-07 | 1.37E-05 | 179 | 183 |
| CPSF1     | 0.357962344 | 6.07E-07 | 1.37E-05 | 179 | 183 |
| CYHR1     | 0.357962344 | 6.07E-07 | 1.37E-05 | 179 | 183 |
| DGAT1     | 0.357962344 | 6.07E-07 | 1.37E-05 | 179 | 183 |
| FAM203B   | 0.357962344 | 6.07E-07 | 1.37E-05 | 179 | 183 |
| FBXL6     | 0.357962344 | 6.07E-07 | 1.37E-05 | 179 | 183 |
| FOXH1     | 0.357962344 | 6.07E-07 | 1.37E-05 | 179 | 183 |
| GPT       | 0.357962344 | 6.07E-07 | 1.37E-05 | 179 | 183 |
| HSF1      | 0.357962344 | 6.07E-07 | 1.37E-05 | 179 | 183 |
| KIFC2     | 0.357962344 | 6.07E-07 | 1.37E-05 | 179 | 183 |
| LRRC14    | 0.357962344 | 6.07E-07 | 1.37E-05 | 179 | 183 |
| LRRC24    | 0.357962344 | 6.07E-07 | 1.37E-05 | 179 | 183 |
| MFS3      | 0.357962344 | 6.07E-07 | 1.37E-05 | 179 | 183 |
| MIR1234   | 0.357962344 | 6.07E-07 | 1.37E-05 | 179 | 183 |
| MIR939    | 0.357962344 | 6.07E-07 | 1.37E-05 | 179 | 183 |
| PPP1R16A  | 0.357962344 | 6.07E-07 | 1.37E-05 | 179 | 183 |
| RECQL4    | 0.357962344 | 6.07E-07 | 1.37E-05 | 179 | 183 |
| RN7SL395F | 0.357962344 | 6.07E-07 | 1.37E-05 | 179 | 183 |
| RPL8      | 0.357962344 | 6.07E-07 | 1.37E-05 | 179 | 183 |

|           |             |          |          |     |     |
|-----------|-------------|----------|----------|-----|-----|
| SCRT1     | 0.357962344 | 6.07E-07 | 1.37E-05 | 179 | 183 |
| SCXA      | 0.357962344 | 6.07E-07 | 1.37E-05 | 179 | 183 |
| SCXB      | 0.357962344 | 6.07E-07 | 1.37E-05 | 179 | 183 |
| SLC39A4   | 0.357962344 | 6.07E-07 | 1.37E-05 | 179 | 183 |
| SLC52A2   | 0.357962344 | 6.07E-07 | 1.37E-05 | 179 | 183 |
| TMEM249   | 0.357962344 | 6.07E-07 | 1.37E-05 | 179 | 183 |
| TONSL     | 0.357962344 | 6.07E-07 | 1.37E-05 | 179 | 183 |
| VPS28     | 0.357962344 | 6.07E-07 | 1.37E-05 | 179 | 183 |
| ZNF16     | 0.357962344 | 6.07E-07 | 1.37E-05 | 179 | 183 |
| ZNF250    | 0.357962344 | 6.07E-07 | 1.37E-05 | 179 | 183 |
| ZNF251    | 0.357962344 | 6.07E-07 | 1.37E-05 | 179 | 183 |
| ZNF252P   | 0.357962344 | 6.07E-07 | 1.37E-05 | 179 | 183 |
| ZNF34     | 0.357962344 | 6.07E-07 | 1.37E-05 | 179 | 183 |
| ZNF517    | 0.357962344 | 6.07E-07 | 1.37E-05 | 179 | 183 |
| ZNF7      | 0.357962344 | 6.07E-07 | 1.37E-05 | 179 | 183 |
| MFNG      | 0.35841479  | 5.86E-07 | 1.37E-05 | 179 | 181 |
| CARD10    | 0.35841479  | 5.86E-07 | 1.37E-05 | 179 | 181 |
| CDC42EP1  | 0.35841479  | 5.86E-07 | 1.37E-05 | 179 | 181 |
| LGALS2    | 0.35841479  | 5.86E-07 | 1.37E-05 | 179 | 181 |
| GGA1      | 0.35841479  | 5.86E-07 | 1.37E-05 | 179 | 181 |
| SH3BP1    | 0.35841479  | 5.86E-07 | 1.37E-05 | 179 | 181 |
| PDXP      | 0.35841479  | 5.86E-07 | 1.37E-05 | 179 | 181 |
| RN7SL385F | 0.35841479  | 5.86E-07 | 1.37E-05 | 179 | 181 |
| LGALS1    | 0.35841479  | 5.86E-07 | 1.37E-05 | 179 | 181 |
| NOL12     | 0.35841479  | 5.86E-07 | 1.37E-05 | 179 | 181 |
| TRIOBP    | 0.35841479  | 5.86E-07 | 1.37E-05 | 179 | 181 |
| snoU13 EN | 0.35841479  | 5.86E-07 | 1.37E-05 | 179 | 181 |
| GCAT      | 0.35841479  | 5.86E-07 | 1.37E-05 | 179 | 181 |
| H1FO      | 0.35841479  | 5.86E-07 | 1.37E-05 | 179 | 181 |
| ANKRD54   | 0.35841479  | 5.86E-07 | 1.37E-05 | 179 | 181 |
| GALR3     | 0.35841479  | 5.86E-07 | 1.37E-05 | 179 | 181 |
| MIR658    | 0.35841479  | 5.86E-07 | 1.37E-05 | 179 | 181 |
| EIF3L     | 0.35841479  | 5.86E-07 | 1.37E-05 | 179 | 181 |
| MIR659    | 0.35841479  | 5.86E-07 | 1.37E-05 | 179 | 181 |
| RBX1      | 0.358637084 | 5.76E-07 | 1.37E-05 | 179 | 181 |
| TMEM184B  | 0.359756382 | 5.28E-07 | 1.26E-05 | 179 | 181 |
| RN7SL704F | 0.359756382 | 5.28E-07 | 1.26E-05 | 179 | 181 |
| PHF5A     | 0.360693998 | 4.91E-07 | 1.17E-05 | 179 | 182 |
| APOL1     | 0.360819777 | 4.86E-07 | 1.16E-05 | 179 | 181 |
| APOL2     | 0.360819777 | 4.86E-07 | 1.16E-05 | 179 | 181 |
| MYH9      | 0.360819777 | 4.86E-07 | 1.16E-05 | 179 | 181 |
| RN7SL349F | 0.360819777 | 4.86E-07 | 1.16E-05 | 179 | 181 |
| TXN2      | 0.360819777 | 4.86E-07 | 1.16E-05 | 179 | 181 |
| FOXRED2   | 0.360819777 | 4.86E-07 | 1.16E-05 | 179 | 181 |
| EIF3D     | 0.360819777 | 4.86E-07 | 1.16E-05 | 179 | 181 |
| CSDC2     | 0.362452832 | 4.28E-07 | 1.03E-05 | 179 | 182 |
| PMM1      | 0.362452832 | 4.28E-07 | 1.03E-05 | 179 | 182 |
| DESI1     | 0.362452832 | 4.28E-07 | 1.03E-05 | 179 | 182 |
| XRCC6     | 0.362452832 | 4.28E-07 | 1.03E-05 | 179 | 182 |
| NHP2L1    | 0.362452832 | 4.28E-07 | 1.03E-05 | 179 | 182 |
| C22orf46  | 0.362452832 | 4.28E-07 | 1.03E-05 | 179 | 182 |

|           |             |          |          |     |     |
|-----------|-------------|----------|----------|-----|-----|
| RNU6ATAC2 | 0.362452832 | 4.28E-07 | 1.03E-05 | 179 | 182 |
| snoU13 EN | 0.362727916 | 4.19E-07 | 1.01E-05 | 179 | 181 |
| MCM5      | 0.363640917 | 3.90E-07 | 9.45E-06 | 179 | 181 |
| C1QTNF6   | 0.363871258 | 3.83E-07 | 9.29E-06 | 179 | 181 |
| SSTR3     | 0.363871258 | 3.83E-07 | 9.29E-06 | 179 | 181 |
| RAC2      | 0.363871258 | 3.83E-07 | 9.29E-06 | 179 | 181 |
| snoU13 EN | 0.364077518 | 3.77E-07 | 9.17E-06 | 179 | 181 |
| IFT27     | 0.364277737 | 3.71E-07 | 9.03E-06 | 179 | 181 |
| PVALB     | 0.364277737 | 3.71E-07 | 9.03E-06 | 179 | 181 |
| NCF4      | 0.364277737 | 3.71E-07 | 9.03E-06 | 179 | 181 |
| CSF2RB    | 0.364277737 | 3.71E-07 | 9.03E-06 | 179 | 181 |
| CACNG2    | 0.364494461 | 3.64E-07 | 8.91E-06 | 179 | 181 |
| MKL1      | 0.36523627  | 3.44E-07 | 8.41E-06 | 179 | 181 |
| RASD2     | 0.366165519 | 3.19E-07 | 7.82E-06 | 179 | 181 |
| APOL6     | 0.366165519 | 3.19E-07 | 7.82E-06 | 179 | 181 |
| MB        | 0.366165519 | 3.19E-07 | 7.82E-06 | 179 | 181 |
| APOL5     | 0.366165519 | 3.19E-07 | 7.82E-06 | 179 | 181 |
| CASC7     | 0.367775549 | 2.81E-07 | 6.91E-06 | 179 | 182 |
| CHRAC1    | 0.367775549 | 2.81E-07 | 6.91E-06 | 179 | 182 |
| SLC16A8   | 0.36849375  | 2.65E-07 | 6.54E-06 | 179 | 181 |
| BAIAP2L2  | 0.36849375  | 2.65E-07 | 6.54E-06 | 179 | 181 |
| HMOX1     | 0.370427771 | 2.27E-07 | 5.61E-06 | 179 | 181 |
| PDGFB     | 0.371052241 | 2.16E-07 | 5.34E-06 | 179 | 181 |
| ISX       | 0.371490025 | 2.08E-07 | 5.15E-06 | 179 | 181 |
| HMGXB4    | 0.371490025 | 2.08E-07 | 5.15E-06 | 179 | 181 |
| TOM1      | 0.371742389 | 2.04E-07 | 5.06E-06 | 179 | 181 |
| MIR3909   | 0.371742389 | 2.04E-07 | 5.06E-06 | 179 | 181 |
| MICALL1   | 0.372077108 | 1.99E-07 | 4.94E-06 | 179 | 181 |
| C22orf23  | 0.372077108 | 1.99E-07 | 4.94E-06 | 179 | 181 |
| SOX10     | 0.372077108 | 1.99E-07 | 4.94E-06 | 179 | 181 |
| MIR4534   | 0.372077108 | 1.99E-07 | 4.94E-06 | 179 | 181 |
| MIR1281   | 0.37223773  | 1.96E-07 | 4.89E-06 | 179 | 181 |
| APOL3     | 0.372646853 | 1.90E-07 | 4.74E-06 | 179 | 181 |
| APOL4     | 0.372646853 | 1.90E-07 | 4.74E-06 | 179 | 181 |
| TEX33     | 0.372734808 | 1.88E-07 | 4.71E-06 | 179 | 181 |
| TST       | 0.372734808 | 1.88E-07 | 4.71E-06 | 179 | 181 |
| MPST      | 0.372734808 | 1.88E-07 | 4.71E-06 | 179 | 181 |
| KCTD17    | 0.372734808 | 1.88E-07 | 4.71E-06 | 179 | 181 |
| RN7SKP214 | 0.372734808 | 1.88E-07 | 4.71E-06 | 179 | 181 |
| TMPRSS6   | 0.372734808 | 1.88E-07 | 4.71E-06 | 179 | 181 |
| IL2RB     | 0.372734808 | 1.88E-07 | 4.71E-06 | 179 | 181 |
| PLA2G6    | 0.373026484 | 1.84E-07 | 4.63E-06 | 179 | 181 |
| EP300     | 0.373540425 | 1.76E-07 | 4.45E-06 | 179 | 182 |
| L3MBTL2   | 0.373540425 | 1.76E-07 | 4.45E-06 | 179 | 182 |
| CHADL     | 0.373540425 | 1.76E-07 | 4.45E-06 | 179 | 182 |
| RANGAP1   | 0.373540425 | 1.76E-07 | 4.45E-06 | 179 | 182 |
| ZC3H7B    | 0.37397002  | 1.70E-07 | 4.31E-06 | 179 | 182 |
| PICK1     | 0.374917464 | 1.58E-07 | 4.00E-06 | 179 | 181 |
| POLR2F    | 0.376519299 | 1.38E-07 | 3.51E-06 | 179 | 181 |
| ADSL      | 0.382415352 | 8.46E-08 | 2.15E-06 | 179 | 181 |
| SGSM3     | 0.382415352 | 8.46E-08 | 2.15E-06 | 179 | 181 |

|           |             |          |          |     |     |
|-----------|-------------|----------|----------|-----|-----|
| NPTXR     | 0.384292484 | 7.22E-08 | 1.84E-06 | 179 | 181 |
| CBX6      | 0.384292484 | 7.22E-08 | 1.84E-06 | 179 | 181 |
| TNRC6B    | 0.384486091 | 7.11E-08 | 1.81E-06 | 179 | 181 |
| FAM83F    | 0.392979953 | 3.43E-08 | 8.76E-07 | 179 | 181 |
| APOBEC3C  | 0.396273204 | 2.57E-08 | 6.58E-07 | 179 | 181 |
| APOBEC3D  | 0.396273204 | 2.57E-08 | 6.58E-07 | 179 | 181 |
| APOBEC3F  | 0.396273204 | 2.57E-08 | 6.58E-07 | 179 | 181 |
| APOBEC3G  | 0.396273204 | 2.57E-08 | 6.58E-07 | 179 | 181 |
| APOBEC3H  | 0.396273204 | 2.57E-08 | 6.58E-07 | 179 | 181 |
| CBX7      | 0.396336777 | 2.56E-08 | 6.57E-07 | 179 | 181 |
| RPL3      | 0.398318121 | 2.15E-08 | 5.52E-07 | 179 | 181 |
| SNORD83B  | 0.398318121 | 2.15E-08 | 5.52E-07 | 179 | 181 |
| SNORD83A  | 0.398318121 | 2.15E-08 | 5.52E-07 | 179 | 181 |
| SNORD43 E | 0.398318121 | 2.15E-08 | 5.52E-07 | 179 | 181 |
| SYNGR1    | 0.398318121 | 2.15E-08 | 5.52E-07 | 179 | 181 |
| TOMM22    | 0.398469155 | 2.12E-08 | 5.48E-07 | 179 | 181 |
| JOSD1     | 0.398469155 | 2.12E-08 | 5.48E-07 | 179 | 181 |
| GTPBP1    | 0.398469155 | 2.12E-08 | 5.48E-07 | 179 | 181 |
| SUN2      | 0.398469155 | 2.12E-08 | 5.48E-07 | 179 | 181 |
| DNAL4     | 0.398469155 | 2.12E-08 | 5.48E-07 | 179 | 181 |
| APOBEC3A  | 0.398483795 | 2.12E-08 | 5.48E-07 | 179 | 181 |
| APOBEC3B  | 0.398483795 | 2.12E-08 | 5.48E-07 | 179 | 181 |
| TAB1      | 0.399195615 | 1.99E-08 | 5.18E-07 | 179 | 181 |
| MGAT3     | 0.399195615 | 1.99E-08 | 5.18E-07 | 179 | 181 |
| SMCR7L    | 0.399195615 | 1.99E-08 | 5.18E-07 | 179 | 181 |
| ATF4      | 0.399195615 | 1.99E-08 | 5.18E-07 | 179 | 181 |
| RPS19BP1  | 0.399195615 | 1.99E-08 | 5.18E-07 | 179 | 181 |
| KDELR3    | 0.400886837 | 1.71E-08 | 4.48E-07 | 179 | 181 |
| DDX17     | 0.400886837 | 1.71E-08 | 4.48E-07 | 179 | 181 |
| DMC1      | 0.400886837 | 1.71E-08 | 4.48E-07 | 179 | 181 |
| FAM227A   | 0.400886837 | 1.71E-08 | 4.48E-07 | 179 | 181 |
| CBY1      | 0.400886837 | 1.71E-08 | 4.48E-07 | 179 | 181 |
| CACNA1I   | 0.401499638 | 1.62E-08 | 4.26E-07 | 179 | 181 |
| ENTHD1    | 0.401499638 | 1.62E-08 | 4.26E-07 | 179 | 181 |
| RN7SKP21C | 0.401499638 | 1.62E-08 | 4.26E-07 | 179 | 181 |
| GRAP2     | 0.401499638 | 1.62E-08 | 4.26E-07 | 179 | 181 |
| CSNK1E    | 0.411733855 | 6.38E-09 | 1.69E-07 | 179 | 181 |
| KCNJ4     | 0.411733855 | 6.38E-09 | 1.69E-07 | 179 | 181 |
| ABHD4     | 0.509007432 | 1.61E-13 | 4.27E-12 | 179 | 178 |
| DAD1      | 0.509007432 | 1.61E-13 | 4.27E-12 | 179 | 178 |
| OR4E2     | 0.509007432 | 1.61E-13 | 4.27E-12 | 179 | 178 |
| OR6J1     | 0.509007432 | 1.61E-13 | 4.27E-12 | 179 | 178 |
| TRAC      | 0.509007432 | 1.61E-13 | 4.27E-12 | 179 | 178 |
| TRAJ10    | 0.509007432 | 1.61E-13 | 4.27E-12 | 179 | 178 |
| TRAJ11    | 0.509007432 | 1.61E-13 | 4.27E-12 | 179 | 178 |
| TRAJ12    | 0.509007432 | 1.61E-13 | 4.27E-12 | 179 | 178 |
| TRAJ13    | 0.509007432 | 1.61E-13 | 4.27E-12 | 179 | 178 |
| TRAJ14    | 0.509007432 | 1.61E-13 | 4.27E-12 | 179 | 178 |
| TRAJ16    | 0.509007432 | 1.61E-13 | 4.27E-12 | 179 | 178 |
| TRAJ17    | 0.509007432 | 1.61E-13 | 4.27E-12 | 179 | 178 |
| TRAJ18    | 0.509007432 | 1.61E-13 | 4.27E-12 | 179 | 178 |



|           |             |          |          |     |     |
|-----------|-------------|----------|----------|-----|-----|
| TRAV16    | 0.509007432 | 1.61E-13 | 4.27E-12 | 179 | 178 |
| TRAV17    | 0.509007432 | 1.61E-13 | 4.27E-12 | 179 | 178 |
| TRAV18    | 0.509007432 | 1.61E-13 | 4.27E-12 | 179 | 178 |
| TRAV19    | 0.509007432 | 1.61E-13 | 4.27E-12 | 179 | 178 |
| TRAV20    | 0.509007432 | 1.61E-13 | 4.27E-12 | 179 | 178 |
| TRAV21    | 0.509007432 | 1.61E-13 | 4.27E-12 | 179 | 178 |
| TRAV22    | 0.509007432 | 1.61E-13 | 4.27E-12 | 179 | 178 |
| TRAV23DV6 | 0.509007432 | 1.61E-13 | 4.27E-12 | 179 | 178 |
| TRAV24    | 0.509007432 | 1.61E-13 | 4.27E-12 | 179 | 178 |
| TRAV25    | 0.509007432 | 1.61E-13 | 4.27E-12 | 179 | 178 |
| TRAV27    | 0.509007432 | 1.61E-13 | 4.27E-12 | 179 | 178 |
| TRAV29DV5 | 0.509007432 | 1.61E-13 | 4.27E-12 | 179 | 178 |
| TRAV2     | 0.509007432 | 1.61E-13 | 4.27E-12 | 179 | 178 |
| TRAV30    | 0.509007432 | 1.61E-13 | 4.27E-12 | 179 | 178 |
| TRAV34    | 0.509007432 | 1.61E-13 | 4.27E-12 | 179 | 178 |
| TRAV35    | 0.509007432 | 1.61E-13 | 4.27E-12 | 179 | 178 |
| TRAV36DV7 | 0.509007432 | 1.61E-13 | 4.27E-12 | 179 | 178 |
| TRAV39    | 0.509007432 | 1.61E-13 | 4.27E-12 | 179 | 178 |
| TRAV3     | 0.509007432 | 1.61E-13 | 4.27E-12 | 179 | 178 |
| TRAV40    | 0.509007432 | 1.61E-13 | 4.27E-12 | 179 | 178 |
| TRAV41    | 0.509007432 | 1.61E-13 | 4.27E-12 | 179 | 178 |
| TRAV4     | 0.509007432 | 1.61E-13 | 4.27E-12 | 179 | 178 |
| TRAV5     | 0.509007432 | 1.61E-13 | 4.27E-12 | 179 | 178 |
| TRAV6     | 0.509007432 | 1.61E-13 | 4.27E-12 | 179 | 178 |
| TRAV7     | 0.509007432 | 1.61E-13 | 4.27E-12 | 179 | 178 |
| TRDC      | 0.509007432 | 1.61E-13 | 4.27E-12 | 179 | 178 |
| TRDD1     | 0.509007432 | 1.61E-13 | 4.27E-12 | 179 | 178 |
| TRDD2     | 0.509007432 | 1.61E-13 | 4.27E-12 | 179 | 178 |
| TRDD3     | 0.509007432 | 1.61E-13 | 4.27E-12 | 179 | 178 |
| TRDJ1     | 0.509007432 | 1.61E-13 | 4.27E-12 | 179 | 178 |
| TRDJ2     | 0.509007432 | 1.61E-13 | 4.27E-12 | 179 | 178 |
| TRDJ3     | 0.509007432 | 1.61E-13 | 4.27E-12 | 179 | 178 |
| TRDJ4     | 0.509007432 | 1.61E-13 | 4.27E-12 | 179 | 178 |
| TRDV1     | 0.509007432 | 1.61E-13 | 4.27E-12 | 179 | 178 |
| TRDV2     | 0.509007432 | 1.61E-13 | 4.27E-12 | 179 | 178 |
| TRDV3     | 0.509007432 | 1.61E-13 | 4.27E-12 | 179 | 178 |
| OR10G2    | 0.525311112 | 1.92E-14 | 5.70E-13 | 179 | 178 |
| OXA1L     | 0.52613564  | 1.72E-14 | 5.11E-13 | 179 | 178 |
| SLC7A7    | 0.52613564  | 1.72E-14 | 5.11E-13 | 179 | 178 |
| SNORD41 E | 0.52613564  | 1.72E-14 | 5.11E-13 | 179 | 178 |
| SALL2     | 0.529086022 | 1.16E-14 | 3.45E-13 | 179 | 178 |
| OR10G3    | 0.529086022 | 1.16E-14 | 3.45E-13 | 179 | 178 |
| RN7SL650F | 0.533470658 | 6.35E-15 | 1.90E-13 | 179 | 178 |
| RAB2B     | 0.533470658 | 6.35E-15 | 1.90E-13 | 179 | 178 |
| TOX4      | 0.533470658 | 6.35E-15 | 1.90E-13 | 179 | 178 |
| METTL3    | 0.533470658 | 6.35E-15 | 1.90E-13 | 179 | 178 |
| RPGRIP1   | 0.534117436 | 5.81E-15 | 1.75E-13 | 179 | 178 |
| SUPT16H   | 0.534117436 | 5.81E-15 | 1.75E-13 | 179 | 178 |
| CHD8      | 0.534117436 | 5.81E-15 | 1.75E-13 | 179 | 178 |
| SNORD9    | 0.534117436 | 5.81E-15 | 1.75E-13 | 179 | 178 |
| SNORD8    | 0.534117436 | 5.81E-15 | 1.75E-13 | 179 | 178 |

|           |             |          |          |     |     |
|-----------|-------------|----------|----------|-----|-----|
| OR5AU1    | 0.535358079 | 4.90E-15 | 1.48E-13 | 179 | 178 |
| LINC00641 | 0.535358079 | 4.90E-15 | 1.48E-13 | 179 | 178 |
| MRPL52    | 0.541996233 | 1.93E-15 | 5.86E-14 | 179 | 178 |
| MMP14     | 0.541996233 | 1.93E-15 | 5.86E-14 | 179 | 178 |
| LRP10     | 0.541996233 | 1.93E-15 | 5.86E-14 | 179 | 178 |
| REM2      | 0.541996233 | 1.93E-15 | 5.86E-14 | 179 | 178 |
| RBM23     | 0.541996233 | 1.93E-15 | 5.86E-14 | 179 | 178 |
| PRMT5     | 0.541996233 | 1.93E-15 | 5.86E-14 | 179 | 178 |
| HAUS4     | 0.541996233 | 1.93E-15 | 5.86E-14 | 179 | 178 |
| MIR4707   | 0.541996233 | 1.93E-15 | 5.86E-14 | 179 | 178 |
| AJUBA     | 0.543023039 | 1.67E-15 | 5.11E-14 | 179 | 178 |
| C14orf93  | 0.543023039 | 1.67E-15 | 5.11E-14 | 179 | 178 |
| PSMB5     | 0.543023039 | 1.67E-15 | 5.11E-14 | 179 | 178 |
| SNORA73 E | 0.543023039 | 1.67E-15 | 5.11E-14 | 179 | 178 |
| PSMB11    | 0.543023039 | 1.67E-15 | 5.11E-14 | 179 | 178 |
| CDH24     | 0.543023039 | 1.67E-15 | 5.11E-14 | 179 | 178 |
| ACIN1     | 0.543023039 | 1.67E-15 | 5.11E-14 | 179 | 178 |
| HNRNPC    | 0.543339419 | 1.60E-15 | 4.93E-14 | 179 | 178 |
| OR11H4    | 0.544926563 | 1.28E-15 | 3.94E-14 | 179 | 178 |
| KLHL33    | 0.549105062 | 6.99E-16 | 2.16E-14 | 179 | 178 |
| OSGEP     | 0.549105062 | 6.99E-16 | 2.16E-14 | 179 | 178 |
| TTC5      | 0.549815926 | 6.31E-16 | 1.96E-14 | 179 | 178 |
| CCNB1IP1  | 0.549815926 | 6.31E-16 | 1.96E-14 | 179 | 178 |
| SNORA79 E | 0.549815926 | 6.31E-16 | 1.96E-14 | 179 | 178 |
| SNORD126  | 0.549815926 | 6.31E-16 | 1.96E-14 | 179 | 178 |
| RPPH1     | 0.549815926 | 6.31E-16 | 1.96E-14 | 179 | 178 |
| PARP2     | 0.549815926 | 6.31E-16 | 1.96E-14 | 179 | 178 |
| TEP1      | 0.549815926 | 6.31E-16 | 1.96E-14 | 179 | 178 |
| RNA5SP382 | 0.549815926 | 6.31E-16 | 1.96E-14 | 179 | 178 |
| RN7SL189F | 0.551833199 | 4.70E-16 | 1.47E-14 | 179 | 178 |
| RNASE2    | 0.551833199 | 4.70E-16 | 1.47E-14 | 179 | 178 |
| RNASE3    | 0.551833199 | 4.70E-16 | 1.47E-14 | 179 | 178 |
| METTL17   | 0.551833199 | 4.70E-16 | 1.47E-14 | 179 | 178 |
| SLC39A2   | 0.551833199 | 4.70E-16 | 1.47E-14 | 179 | 178 |
| NDRG2     | 0.551833199 | 4.70E-16 | 1.47E-14 | 179 | 178 |
| TPPP2     | 0.551833199 | 4.70E-16 | 1.47E-14 | 179 | 178 |
| RNASE13   | 0.551833199 | 4.70E-16 | 1.47E-14 | 179 | 178 |
| RNASE7    | 0.551833199 | 4.70E-16 | 1.47E-14 | 179 | 178 |
| RNASE8    | 0.551833199 | 4.70E-16 | 1.47E-14 | 179 | 178 |
| ARHGEF40  | 0.551833199 | 4.70E-16 | 1.47E-14 | 179 | 178 |
| ZNF219    | 0.551833199 | 4.70E-16 | 1.47E-14 | 179 | 178 |
| TMEM253   | 0.551833199 | 4.70E-16 | 1.47E-14 | 179 | 178 |
| EDDM3A    | 0.552859307 | 4.05E-16 | 1.29E-14 | 179 | 178 |
| LINC00516 | 0.552924275 | 4.01E-16 | 1.28E-14 | 179 | 178 |
| MED15P1   | 0.552924275 | 4.01E-16 | 1.28E-14 | 179 | 178 |
| MED15P6   | 0.552924275 | 4.01E-16 | 1.28E-14 | 179 | 178 |
| OR11H12   | 0.552924275 | 4.01E-16 | 1.28E-14 | 179 | 178 |
| OR4K13    | 0.552924275 | 4.01E-16 | 1.28E-14 | 179 | 178 |
| OR4K14    | 0.552924275 | 4.01E-16 | 1.28E-14 | 179 | 178 |
| OR4K15    | 0.552924275 | 4.01E-16 | 1.28E-14 | 179 | 178 |
| OR4K1     | 0.552924275 | 4.01E-16 | 1.28E-14 | 179 | 178 |

|           |             |          |          |     |     |
|-----------|-------------|----------|----------|-----|-----|
| OR4K2     | 0.552924275 | 4.01E-16 | 1.28E-14 | 179 | 178 |
| OR4K5     | 0.552924275 | 4.01E-16 | 1.28E-14 | 179 | 178 |
| OR4M1     | 0.552924275 | 4.01E-16 | 1.28E-14 | 179 | 178 |
| OR4N2     | 0.552924275 | 4.01E-16 | 1.28E-14 | 179 | 178 |
| OR4Q2     | 0.552924275 | 4.01E-16 | 1.28E-14 | 179 | 178 |
| OR4Q3     | 0.552924275 | 4.01E-16 | 1.28E-14 | 179 | 178 |
| POTEG     | 0.552924275 | 4.01E-16 | 1.28E-14 | 179 | 178 |
| POTEM     | 0.552924275 | 4.01E-16 | 1.28E-14 | 179 | 178 |
| snoU13 EN | 0.552924275 | 4.01E-16 | 1.28E-14 | 179 | 178 |
| OR4L1     | 0.552924275 | 4.01E-16 | 1.28E-14 | 179 | 178 |
| RNA5SP38C | 0.552924275 | 4.01E-16 | 1.28E-14 | 179 | 178 |
| OR4K17    | 0.552924275 | 4.01E-16 | 1.28E-14 | 179 | 178 |
| OR4N5     | 0.552924275 | 4.01E-16 | 1.28E-14 | 179 | 178 |
| RNA5SP381 | 0.552924275 | 4.01E-16 | 1.28E-14 | 179 | 178 |
| OR11G2    | 0.552924275 | 4.01E-16 | 1.28E-14 | 179 | 178 |
| OR11H6    | 0.552924275 | 4.01E-16 | 1.28E-14 | 179 | 178 |
| OR11H7    | 0.552924275 | 4.01E-16 | 1.28E-14 | 179 | 178 |
| EDDM3B    | 0.553144424 | 3.88E-16 | 1.28E-14 | 179 | 178 |
| RNASE6    | 0.553144424 | 3.88E-16 | 1.28E-14 | 179 | 178 |
| RNASE1    | 0.553144424 | 3.88E-16 | 1.28E-14 | 179 | 178 |
| C14orf119 | 0.554367996 | 3.24E-16 | 1.07E-14 | 179 | 178 |
| CEBPE     | 0.554367996 | 3.24E-16 | 1.07E-14 | 179 | 178 |
| SLC7A8    | 0.554367996 | 3.24E-16 | 1.07E-14 | 179 | 178 |
| RNASE11   | 0.555969799 | 2.56E-16 | 8.49E-15 | 179 | 178 |
| APEX1     | 0.556642348 | 2.31E-16 | 7.70E-15 | 179 | 178 |
| TMEM55B   | 0.556642348 | 2.31E-16 | 7.70E-15 | 179 | 178 |
| PNP       | 0.556642348 | 2.31E-16 | 7.70E-15 | 179 | 178 |
| OR6S1     | 0.558858319 | 1.66E-16 | 5.55E-15 | 179 | 178 |
| ANG       | 0.558858319 | 1.66E-16 | 5.55E-15 | 179 | 178 |
| RNASE4    | 0.558858319 | 1.66E-16 | 5.55E-15 | 179 | 178 |
| RNASE12   | 0.560000443 | 1.40E-16 | 4.70E-15 | 179 | 178 |
| STXBP6    | 0.561591821 | 1.10E-16 | 3.70E-15 | 179 | 178 |
| RNASE10   | 0.562912022 | 9.03E-17 | 3.04E-15 | 179 | 178 |
| RNASE9    | 0.562912022 | 9.03E-17 | 3.04E-15 | 179 | 178 |
| C14orf164 | 0.566336438 | 5.36E-17 | 1.81E-15 | 179 | 178 |
| HOMEZ     | 0.566336438 | 5.36E-17 | 1.81E-15 | 179 | 178 |
| PPP1R3E   | 0.566336438 | 5.36E-17 | 1.81E-15 | 179 | 178 |
| BCL2L2    | 0.566336438 | 5.36E-17 | 1.81E-15 | 179 | 178 |
| PABPN1    | 0.569821417 | 3.13E-17 | 1.06E-15 | 179 | 178 |
| SLC22A17  | 0.569821417 | 3.13E-17 | 1.06E-15 | 179 | 178 |
| EFS       | 0.569821417 | 3.13E-17 | 1.06E-15 | 179 | 178 |
| DHRS2     | 0.569837792 | 3.12E-17 | 1.06E-15 | 179 | 178 |
| IL25      | 0.569957232 | 3.06E-17 | 1.04E-15 | 179 | 178 |
| CMTM5     | 0.569957232 | 3.06E-17 | 1.04E-15 | 179 | 178 |
| MYH6      | 0.569957232 | 3.06E-17 | 1.04E-15 | 179 | 178 |
| MIR208A   | 0.569957232 | 3.06E-17 | 1.04E-15 | 179 | 178 |
| MYH7      | 0.569957232 | 3.06E-17 | 1.04E-15 | 179 | 178 |
| MIR208B   | 0.569957232 | 3.06E-17 | 1.04E-15 | 179 | 178 |
| NGDN      | 0.569957232 | 3.06E-17 | 1.04E-15 | 179 | 178 |
| ZFHX2     | 0.569957232 | 3.06E-17 | 1.04E-15 | 179 | 178 |
| THTPA     | 0.569957232 | 3.06E-17 | 1.04E-15 | 179 | 178 |

|             |             |          |          |     |     |
|-------------|-------------|----------|----------|-----|-----|
| AP1G2       | 0.569957232 | 3.06E-17 | 1.04E-15 | 179 | 178 |
| JPH4        | 0.569957232 | 3.06E-17 | 1.04E-15 | 179 | 178 |
| CTSG        | 0.570858819 | 2.66E-17 | 9.21E-16 | 179 | 178 |
| GZMH        | 0.570858819 | 2.66E-17 | 9.21E-16 | 179 | 178 |
| GZMB        | 0.570858819 | 2.66E-17 | 9.21E-16 | 179 | 178 |
| DHRS4L1     | 0.571060135 | 2.58E-17 | 8.96E-16 | 179 | 178 |
| LRRC16B     | 0.571060135 | 2.58E-17 | 8.96E-16 | 179 | 178 |
| RN7SKP20E   | 0.57113912  | 2.55E-17 | 8.88E-16 | 179 | 178 |
| LINC00596   | 0.57113912  | 2.55E-17 | 8.88E-16 | 179 | 178 |
| DHRS4       | 0.575241531 | 1.34E-17 | 4.67E-16 | 179 | 178 |
| DHRS4L2     | 0.575730853 | 1.24E-17 | 4.33E-16 | 179 | 178 |
| DHRS1       | 0.58205737  | 4.49E-18 | 1.58E-16 | 179 | 178 |
| NOP9        | 0.58205737  | 4.49E-18 | 1.58E-16 | 179 | 178 |
| CIDEB       | 0.58205737  | 4.49E-18 | 1.58E-16 | 179 | 178 |
| LTB4R2      | 0.58205737  | 4.49E-18 | 1.58E-16 | 179 | 178 |
| LTB4R       | 0.58205737  | 4.49E-18 | 1.58E-16 | 179 | 178 |
| ADCY4       | 0.58205737  | 4.49E-18 | 1.58E-16 | 179 | 178 |
| RIPK3       | 0.58205737  | 4.49E-18 | 1.58E-16 | 179 | 178 |
| NFATC4      | 0.58205737  | 4.49E-18 | 1.58E-16 | 179 | 178 |
| NYNRIN      | 0.58205737  | 4.49E-18 | 1.58E-16 | 179 | 178 |
| CBLN3       | 0.58205737  | 4.49E-18 | 1.58E-16 | 179 | 178 |
| TINF2       | 0.582078561 | 4.48E-18 | 1.58E-16 | 179 | 178 |
| TGM1        | 0.582078561 | 4.48E-18 | 1.58E-16 | 179 | 178 |
| RABGGTA     | 0.582078561 | 4.48E-18 | 1.58E-16 | 179 | 178 |
| NRL         | 0.582180664 | 4.41E-18 | 1.57E-16 | 179 | 178 |
| PCK2        | 0.582180664 | 4.41E-18 | 1.57E-16 | 179 | 178 |
| DCAF11      | 0.582180664 | 4.41E-18 | 1.57E-16 | 179 | 178 |
| FITM1       | 0.582180664 | 4.41E-18 | 1.57E-16 | 179 | 178 |
| EMC9        | 0.582180664 | 4.41E-18 | 1.57E-16 | 179 | 178 |
| PSME1       | 0.582180664 | 4.41E-18 | 1.57E-16 | 179 | 178 |
| PSME2       | 0.582180664 | 4.41E-18 | 1.57E-16 | 179 | 178 |
| RNF31       | 0.582180664 | 4.41E-18 | 1.57E-16 | 179 | 178 |
| IRF9        | 0.582180664 | 4.41E-18 | 1.57E-16 | 179 | 178 |
| RNA5SP383   | 0.582180664 | 4.41E-18 | 1.57E-16 | 179 | 178 |
| REC8        | 0.582180664 | 4.41E-18 | 1.57E-16 | 179 | 178 |
| IPO4        | 0.582180664 | 4.41E-18 | 1.57E-16 | 179 | 178 |
| TM9SF1      | 0.582180664 | 4.41E-18 | 1.57E-16 | 179 | 178 |
| CHMP4A      | 0.582180664 | 4.41E-18 | 1.57E-16 | 179 | 178 |
| TSSK4       | 0.582180664 | 4.41E-18 | 1.57E-16 | 179 | 178 |
| MDP1        | 0.582180664 | 4.41E-18 | 1.57E-16 | 179 | 178 |
| NEDD8       | 0.582180664 | 4.41E-18 | 1.57E-16 | 179 | 178 |
| GMPR2       | 0.582180664 | 4.41E-18 | 1.57E-16 | 179 | 178 |
| CPNE6       | 0.582198002 | 4.39E-18 | 1.57E-16 | 179 | 178 |
| KHNYN       | 0.583422272 | 3.60E-18 | 1.32E-16 | 179 | 178 |
| SDR39U1     | 0.583422272 | 3.60E-18 | 1.32E-16 | 179 | 178 |
| CMA1        | 0.583422272 | 3.60E-18 | 1.32E-16 | 179 | 178 |
| SNORD37   E | 0.588185178 | 1.65E-18 | 6.08E-17 | 179 | 178 |
| MIR4307     | 0.593924029 | 6.33E-19 | 2.34E-17 | 179 | 178 |
| NOVA1       | 0.596069239 | 4.40E-19 | 1.63E-17 | 179 | 178 |
| LINC00609   | 0.598576636 | 2.87E-19 | 1.06E-17 | 179 | 179 |
| GPR33       | 0.598818023 | 2.75E-19 | 1.02E-17 | 179 | 179 |

|           |             |          |          |     |     |
|-----------|-------------|----------|----------|-----|-----|
| NUBPL     | 0.599343946 | 2.51E-19 | 9.34E-18 | 179 | 179 |
| BNIP3P1   | 0.600690254 | 1.99E-19 | 7.42E-18 | 179 | 178 |
| snoU13 EN | 0.602164572 | 1.54E-19 | 5.76E-18 | 179 | 179 |
| BRMS1L    | 0.602164572 | 1.54E-19 | 5.76E-18 | 179 | 179 |
| RALGAPA1  | 0.602240667 | 1.52E-19 | 5.70E-18 | 179 | 179 |
| LINC0064E | 0.60332181  | 1.26E-19 | 4.73E-18 | 179 | 178 |
| AKAP6     | 0.604468609 | 1.03E-19 | 3.88E-18 | 179 | 179 |
| BAZ1A     | 0.611975744 | 2.73E-20 | 1.03E-18 | 179 | 179 |
| HECTD1    | 0.612133763 | 2.66E-20 | 9.98E-19 | 179 | 179 |
| MIPOL1    | 0.612178877 | 2.63E-20 | 9.92E-19 | 179 | 179 |
| STRN3     | 0.612201189 | 2.62E-20 | 9.89E-19 | 179 | 179 |
| CFL2      | 0.612226184 | 2.61E-20 | 9.86E-19 | 179 | 179 |
| G2E3      | 0.613026582 | 2.26E-20 | 8.55E-19 | 179 | 178 |
| SCFD1     | 0.613026582 | 2.26E-20 | 8.55E-19 | 179 | 178 |
| PRKD1     | 0.614149121 | 1.85E-20 | 7.00E-19 | 179 | 178 |
| RN7SL660F | 0.614515376 | 1.73E-20 | 6.56E-19 | 179 | 179 |
| AP4S1     | 0.615239205 | 1.51E-20 | 5.77E-19 | 179 | 179 |
| MIR624    | 0.615306631 | 1.50E-20 | 5.70E-19 | 179 | 179 |
| DPPA3P2   | 0.616345029 | 1.24E-20 | 4.73E-19 | 179 | 179 |
| SFTA3     | 0.616345029 | 1.24E-20 | 4.73E-19 | 179 | 179 |
| SLC25A21  | 0.616382964 | 1.23E-20 | 4.71E-19 | 179 | 179 |
| PTCSC3    | 0.616420457 | 1.22E-20 | 4.69E-19 | 179 | 179 |
| RN7SKP21  | 0.616420457 | 1.22E-20 | 4.69E-19 | 179 | 179 |
| MBIP      | 0.616420457 | 1.22E-20 | 4.69E-19 | 179 | 179 |
| NFKBIA    | 0.617832481 | 9.43E-21 | 3.64E-19 | 179 | 179 |
| INSM2     | 0.617832481 | 9.43E-21 | 3.64E-19 | 179 | 179 |
| COCH      | 0.618129182 | 8.93E-21 | 3.45E-19 | 179 | 179 |
| SNORA31 E | 0.618137825 | 8.92E-21 | 3.45E-19 | 179 | 179 |
| MIR4503   | 0.618557381 | 8.26E-21 | 3.20E-19 | 179 | 179 |
| ARHGAP5   | 0.620168266 | 6.14E-21 | 2.38E-19 | 179 | 179 |
| HEATR5A   | 0.62145195  | 4.84E-21 | 1.88E-19 | 179 | 179 |
| DTD2      | 0.621512634 | 4.78E-21 | 1.86E-19 | 179 | 179 |
| C14orf23  | 0.623768385 | 3.14E-21 | 1.22E-19 | 179 | 178 |
| FOXG1     | 0.623768385 | 3.14E-21 | 1.22E-19 | 179 | 178 |
| PAX9      | 0.62387495  | 3.08E-21 | 1.20E-19 | 179 | 179 |
| KIAA0391  | 0.624909396 | 2.53E-21 | 9.93E-20 | 179 | 179 |
| PSMA6     | 0.624909396 | 2.53E-21 | 9.93E-20 | 179 | 179 |
| SRP54     | 0.625033352 | 2.48E-21 | 9.73E-20 | 179 | 179 |
| FAM177A1  | 0.625033352 | 2.48E-21 | 9.73E-20 | 179 | 179 |
| PPP2R3C   | 0.625033352 | 2.48E-21 | 9.73E-20 | 179 | 179 |
| RN7SKP257 | 0.625123895 | 2.43E-21 | 9.62E-20 | 179 | 179 |
| KLHL28    | 0.632830737 | 5.59E-22 | 2.21E-20 | 179 | 179 |
| NPAS3     | 0.635368009 | 3.41E-22 | 1.35E-20 | 179 | 179 |
| MIR5580   | 0.636259126 | 2.86E-22 | 1.14E-20 | 179 | 179 |
| BMP4      | 0.636259126 | 2.86E-22 | 1.14E-20 | 179 | 179 |
| EAPP      | 0.640285116 | 1.29E-22 | 5.15E-21 | 179 | 179 |
| SNX6      | 0.64097475  | 1.13E-22 | 4.50E-21 | 179 | 179 |
| GPHN      | 0.641596978 | 9.95E-23 | 3.98E-21 | 179 | 179 |
| RN7SL3    | 0.642707223 | 7.96E-23 | 3.19E-21 | 179 | 179 |
| RN7SL2    | 0.642707223 | 7.96E-23 | 3.19E-21 | 179 | 179 |
| ARF6      | 0.642707223 | 7.96E-23 | 3.19E-21 | 179 | 179 |

|           |             |          |          |     |     |
|-----------|-------------|----------|----------|-----|-----|
| C14orf28  | 0.642845515 | 7.75E-23 | 3.12E-21 | 179 | 179 |
| C14orf182 | 0.643096678 | 7.37E-23 | 2.97E-21 | 179 | 179 |
| SOS2      | 0.643130391 | 7.32E-23 | 2.95E-21 | 179 | 179 |
| RN7SKP193 | 0.643183369 | 7.24E-23 | 2.93E-21 | 179 | 179 |
| C14orf183 | 0.643183369 | 7.24E-23 | 2.93E-21 | 179 | 179 |
| METTL21D  | 0.643183369 | 7.24E-23 | 2.93E-21 | 179 | 179 |
| SPTSSA    | 0.643188287 | 7.23E-23 | 2.93E-21 | 179 | 179 |
| NEMF      | 0.644372652 | 5.69E-23 | 2.32E-21 | 179 | 179 |
| CDKN3     | 0.650732295 | 1.55E-23 | 6.32E-22 | 179 | 179 |
| CNIH      | 0.650732295 | 1.55E-23 | 6.32E-22 | 179 | 179 |
| GMFB      | 0.650732295 | 1.55E-23 | 6.32E-22 | 179 | 179 |
| LRFN5     | 0.651125292 | 1.43E-23 | 5.86E-22 | 179 | 179 |
| SAMD4A    | 0.651839044 | 1.23E-23 | 5.06E-22 | 179 | 179 |
| GCH1      | 0.651839044 | 1.23E-23 | 5.06E-22 | 179 | 179 |
| RNU6ATAC9 | 0.651839044 | 1.23E-23 | 5.06E-22 | 179 | 179 |
| EGLN3     | 0.652480555 | 1.08E-23 | 4.45E-22 | 179 | 179 |
| CLEC14A   | 0.652786066 | 1.01E-23 | 4.18E-22 | 179 | 179 |
| LGALS3    | 0.652940242 | 9.81E-24 | 4.06E-22 | 179 | 179 |
| SSTR1     | 0.653249378 | 9.19E-24 | 3.81E-22 | 179 | 179 |
| MAPK1IP1L | 0.653373692 | 8.96E-24 | 3.72E-22 | 179 | 179 |
| FOXA1     | 0.65425723  | 7.45E-24 | 3.09E-22 | 179 | 179 |
| FAM179B   | 0.655341361 | 5.93E-24 | 2.47E-22 | 179 | 179 |
| SNORD58   | 0.655341361 | 5.93E-24 | 2.47E-22 | 179 | 179 |
| PTGDR     | 0.658787391 | 2.86E-24 | 1.19E-22 | 179 | 178 |
| PTGER2    | 0.658787391 | 2.86E-24 | 1.19E-22 | 179 | 178 |
| TXNDC16   | 0.658787391 | 2.86E-24 | 1.19E-22 | 179 | 178 |
| TTC6      | 0.65889903  | 2.79E-24 | 1.17E-22 | 179 | 179 |
| POLE2     | 0.659353806 | 2.53E-24 | 1.06E-22 | 179 | 179 |
| RNU6ATAC3 | 0.659353806 | 2.53E-24 | 1.06E-22 | 179 | 179 |
| KLHDC1    | 0.659425085 | 2.49E-24 | 1.05E-22 | 179 | 179 |
| KLHDC2    | 0.659425085 | 2.49E-24 | 1.05E-22 | 179 | 179 |
| CGRRF1    | 0.661194885 | 1.70E-24 | 7.22E-23 | 179 | 179 |
| WDHD1     | 0.661961792 | 1.45E-24 | 6.13E-23 | 179 | 179 |
| SOCS4     | 0.663092618 | 1.13E-24 | 4.81E-23 | 179 | 179 |
| DLGAP5    | 0.663615654 | 1.01E-24 | 4.30E-23 | 179 | 179 |
| SNORA42 E | 0.663756592 | 9.80E-25 | 4.18E-23 | 179 | 179 |
| snoU83B   | 0.664721416 | 7.94E-25 | 3.39E-23 | 179 | 179 |
| PYGL      | 0.664721416 | 7.94E-25 | 3.39E-23 | 179 | 179 |
| ABHD12B   | 0.664721416 | 7.94E-25 | 3.39E-23 | 179 | 179 |
| L2HGDH    | 0.66677198  | 5.07E-25 | 2.18E-23 | 179 | 179 |
| MIR4504   | 0.66677198  | 5.07E-25 | 2.18E-23 | 179 | 179 |
| LINC00519 | 0.666885802 | 4.94E-25 | 2.13E-23 | 179 | 179 |
| LINC0052C | 0.667804714 | 4.03E-25 | 1.74E-23 | 179 | 179 |
| RPL13AP3  | 0.667804714 | 4.03E-25 | 1.74E-23 | 179 | 179 |
| ATL1      | 0.668421037 | 3.52E-25 | 1.52E-23 | 179 | 179 |
| SAV1      | 0.668421037 | 3.52E-25 | 1.52E-23 | 179 | 179 |
| RN7SL452F | 0.668421037 | 3.52E-25 | 1.52E-23 | 179 | 179 |
| NIN       | 0.668421037 | 3.52E-25 | 1.52E-23 | 179 | 179 |
| ATP5S     | 0.668422001 | 3.52E-25 | 1.52E-23 | 179 | 179 |
| CDKL1     | 0.668422001 | 3.52E-25 | 1.52E-23 | 179 | 179 |
| MAP4K5    | 0.668422001 | 3.52E-25 | 1.52E-23 | 179 | 179 |

|           |             |          |          |     |     |
|-----------|-------------|----------|----------|-----|-----|
| LINC00639 | 0.668512052 | 3.45E-25 | 1.51E-23 | 179 | 179 |
| LINC00517 | 0.668847897 | 3.20E-25 | 1.41E-23 | 179 | 179 |
| FBX034    | 0.670892812 | 2.03E-25 | 8.94E-24 | 179 | 179 |
| ATG14     | 0.670892812 | 2.03E-25 | 8.94E-24 | 179 | 179 |
| TBPL2     | 0.670892812 | 2.03E-25 | 8.94E-24 | 179 | 179 |
| MIR4308   | 0.671085318 | 1.95E-25 | 8.61E-24 | 179 | 179 |
| MPP5      | 0.671488222 | 1.78E-25 | 7.88E-24 | 179 | 179 |
| TRIM9     | 0.671710964 | 1.69E-25 | 7.51E-24 | 179 | 179 |
| TMX1      | 0.671824302 | 1.65E-25 | 7.34E-24 | 179 | 179 |
| FSCB      | 0.671964911 | 1.60E-25 | 7.12E-24 | 179 | 179 |
| snoU13 EN | 0.671964911 | 1.60E-25 | 7.12E-24 | 179 | 179 |
| SNORA70 E | 0.672030758 | 1.57E-25 | 7.04E-24 | 179 | 179 |
| FRMD6     | 0.674921954 | 8.20E-26 | 3.67E-24 | 179 | 178 |
| GPR137C   | 0.67586076  | 6.62E-26 | 2.97E-24 | 179 | 178 |
| ERO1L     | 0.67586076  | 6.62E-26 | 2.97E-24 | 179 | 178 |
| PSMC6     | 0.67586076  | 6.62E-26 | 2.97E-24 | 179 | 178 |
| STYX      | 0.67586076  | 6.62E-26 | 2.97E-24 | 179 | 178 |
| GNPNAT1   | 0.67586076  | 6.62E-26 | 2.97E-24 | 179 | 178 |
| RN7SL588F | 0.67586076  | 6.62E-26 | 2.97E-24 | 179 | 178 |
| FERMT2    | 0.67586076  | 6.62E-26 | 2.97E-24 | 179 | 178 |
| DDHD1     | 0.67586076  | 6.62E-26 | 2.97E-24 | 179 | 178 |
| SEC23A    | 0.676089617 | 6.28E-26 | 2.86E-24 | 179 | 179 |
| LINC0064C | 0.676364094 | 5.90E-26 | 2.69E-24 | 179 | 178 |
| RNA5SP385 | 0.678399748 | 3.70E-26 | 1.69E-24 | 179 | 178 |
| C14orf37  | 0.680740642 | 2.15E-26 | 9.87E-25 | 179 | 179 |
| RN7SL598F | 0.680740642 | 2.15E-26 | 9.87E-25 | 179 | 179 |
| ACTR10    | 0.680740642 | 2.15E-26 | 9.87E-25 | 179 | 179 |
| PSMA3     | 0.680740642 | 2.15E-26 | 9.87E-25 | 179 | 179 |
| DNAAF2    | 0.681212768 | 1.93E-26 | 8.91E-25 | 179 | 179 |
| KTN1      | 0.682287119 | 1.50E-26 | 6.94E-25 | 179 | 179 |
| SNORA31 E | 0.68306147  | 1.25E-26 | 5.80E-25 | 179 | 179 |
| PRPF39    | 0.684771809 | 8.38E-27 | 3.89E-25 | 179 | 179 |
| FAM71D    | 0.685101403 | 7.75E-27 | 3.60E-25 | 179 | 179 |
| KIAA0586  | 0.685990208 | 6.28E-27 | 2.93E-25 | 179 | 179 |
| MAX       | 0.686947802 | 5.00E-27 | 2.33E-25 | 179 | 179 |
| GNG2      | 0.687031353 | 4.90E-27 | 2.29E-25 | 179 | 178 |
| C14orf166 | 0.687031353 | 4.90E-27 | 2.29E-25 | 179 | 178 |
| NID2      | 0.687031353 | 4.90E-27 | 2.29E-25 | 179 | 178 |
| MTHFD1    | 0.689478521 | 2.73E-27 | 1.28E-25 | 179 | 179 |
| ZBTB25    | 0.689478521 | 2.73E-27 | 1.28E-25 | 179 | 179 |
| ATP6V1D   | 0.689915242 | 2.46E-27 | 1.16E-25 | 179 | 179 |
| GEMIN2    | 0.690266424 | 2.26E-27 | 1.07E-25 | 179 | 179 |
| TRAPPC6B  | 0.690266424 | 2.26E-27 | 1.07E-25 | 179 | 179 |
| PNN       | 0.690266424 | 2.26E-27 | 1.07E-25 | 179 | 179 |
| SNORD127  | 0.690569474 | 2.10E-27 | 9.98E-26 | 179 | 179 |
| FKBP3     | 0.690569474 | 2.10E-27 | 9.98E-26 | 179 | 179 |
| MIA2      | 0.691514769 | 1.67E-27 | 7.97E-26 | 179 | 179 |
| CTAGE5    | 0.691514769 | 1.67E-27 | 7.97E-26 | 179 | 179 |
| OTX2      | 0.691724275 | 1.59E-27 | 7.60E-26 | 179 | 179 |
| RN7SL461F | 0.691724275 | 1.59E-27 | 7.60E-26 | 179 | 179 |
| MIR4708   | 0.691950745 | 1.50E-27 | 7.22E-26 | 179 | 179 |

|           |             |          |          |     |     |
|-----------|-------------|----------|----------|-----|-----|
| EXOC5     | 0.693276028 | 1.09E-27 | 5.24E-26 | 179 | 179 |
| AP5M1     | 0.693276028 | 1.09E-27 | 5.24E-26 | 179 | 179 |
| NAA30     | 0.693276028 | 1.09E-27 | 5.24E-26 | 179 | 179 |
| C14orf105 | 0.693276028 | 1.09E-27 | 5.24E-26 | 179 | 179 |
| ESR2      | 0.695292159 | 6.63E-28 | 3.22E-26 | 179 | 179 |
| MDGA2     | 0.69619927  | 5.30E-28 | 2.58E-26 | 179 | 179 |
| FBXO33    | 0.697689069 | 3.66E-28 | 1.79E-26 | 179 | 179 |
| SGPP1     | 0.698911609 | 2.70E-28 | 1.32E-26 | 179 | 179 |
| U3 ENSGOC | 0.699134304 | 2.55E-28 | 1.25E-26 | 179 | 179 |
| SNORD112  | 0.699337969 | 2.43E-28 | 1.19E-26 | 179 | 179 |
| GPR135    | 0.699575844 | 2.29E-28 | 1.12E-26 | 179 | 179 |
| L3HYPDH   | 0.699575844 | 2.29E-28 | 1.12E-26 | 179 | 179 |
| JKAMP     | 0.699575844 | 2.29E-28 | 1.12E-26 | 179 | 179 |
| CCDC175   | 0.699575844 | 2.29E-28 | 1.12E-26 | 179 | 179 |
| DAAM1     | 0.699866738 | 2.12E-28 | 1.05E-26 | 179 | 179 |
| DACT1     | 0.699932237 | 2.09E-28 | 1.04E-26 | 179 | 179 |
| SLC35F4   | 0.700231463 | 1.94E-28 | 9.64E-27 | 179 | 179 |
| RN7SKP99  | 0.700231463 | 1.94E-28 | 9.64E-27 | 179 | 179 |
| ARID4A    | 0.700312373 | 1.90E-28 | 9.49E-27 | 179 | 179 |
| TOMM20L   | 0.700312373 | 1.90E-28 | 9.49E-27 | 179 | 179 |
| TIMM9     | 0.700312373 | 1.90E-28 | 9.49E-27 | 179 | 179 |
| HIF1A     | 0.700640783 | 1.75E-28 | 8.79E-27 | 179 | 179 |
| SNAPC1    | 0.700640783 | 1.75E-28 | 8.79E-27 | 179 | 179 |
| EIF2S1    | 0.700674398 | 1.73E-28 | 8.75E-27 | 179 | 179 |
| PLEK2     | 0.700674398 | 1.73E-28 | 8.75E-27 | 179 | 179 |
| RNA5SP384 | 0.700732732 | 1.71E-28 | 8.66E-27 | 179 | 179 |
| RPS29     | 0.700732732 | 1.71E-28 | 8.66E-27 | 179 | 179 |
| RN7SL1    | 0.700732732 | 1.71E-28 | 8.66E-27 | 179 | 179 |
| LRR1      | 0.700732732 | 1.71E-28 | 8.66E-27 | 179 | 179 |
| MGAT2     | 0.700732732 | 1.71E-28 | 8.66E-27 | 179 | 179 |
| RPL36AL   | 0.700732732 | 1.71E-28 | 8.66E-27 | 179 | 179 |
| KCNH5     | 0.700948821 | 1.62E-28 | 8.30E-27 | 179 | 179 |
| RHOJ      | 0.700948821 | 1.62E-28 | 8.30E-27 | 179 | 179 |
| GPHB5     | 0.700948821 | 1.62E-28 | 8.30E-27 | 179 | 179 |
| PPP2R5E   | 0.700948821 | 1.62E-28 | 8.30E-27 | 179 | 179 |
| RN7SL540F | 0.700948821 | 1.62E-28 | 8.30E-27 | 179 | 179 |
| SCARNA20  | 0.700948821 | 1.62E-28 | 8.30E-27 | 179 | 179 |
| WDR89     | 0.700948821 | 1.62E-28 | 8.30E-27 | 179 | 179 |
| U3 ENSGOC | 0.700948821 | 1.62E-28 | 8.30E-27 | 179 | 179 |
| MIS18BP1  | 0.703009556 | 9.60E-29 | 5.01E-27 | 179 | 179 |
| MIR548H1  | 0.703246441 | 9.04E-29 | 4.72E-27 | 179 | 179 |
| FANCM     | 0.703346685 | 8.81E-29 | 4.62E-27 | 179 | 179 |
| AKAP5     | 0.704616536 | 6.37E-29 | 3.34E-27 | 179 | 179 |
| ZBTB1     | 0.704616536 | 6.37E-29 | 3.34E-27 | 179 | 179 |
| HSPA2     | 0.704616536 | 6.37E-29 | 3.34E-27 | 179 | 179 |
| SYNE2     | 0.705268582 | 5.39E-29 | 2.85E-27 | 179 | 179 |
| SNORD112  | 0.705281586 | 5.37E-29 | 2.84E-27 | 179 | 179 |
| TMEM30B   | 0.705281586 | 5.37E-29 | 2.84E-27 | 179 | 179 |
| SYT16     | 0.705634125 | 4.91E-29 | 2.61E-27 | 179 | 179 |
| LINC00643 | 0.705634125 | 4.91E-29 | 2.61E-27 | 179 | 179 |
| LINC00644 | 0.705634125 | 4.91E-29 | 2.61E-27 | 179 | 179 |

|           |             |          |          |     |     |
|-----------|-------------|----------|----------|-----|-----|
| PELI2     | 0.705803369 | 4.70E-29 | 2.51E-27 | 179 | 179 |
| LINC00238 | 0.706727755 | 3.70E-29 | 1.98E-27 | 179 | 178 |
| TMEM260   | 0.707120094 | 3.34E-29 | 1.80E-27 | 179 | 179 |
| PRKCH     | 0.707215735 | 3.26E-29 | 1.76E-27 | 179 | 179 |
| LINC00871 | 0.708024036 | 2.65E-29 | 1.43E-27 | 179 | 179 |
| FUT8      | 0.708738388 | 2.20E-29 | 1.19E-27 | 179 | 179 |
| MIR625    | 0.708756067 | 2.19E-29 | 1.19E-27 | 179 | 179 |
| PLEKHH1   | 0.709406941 | 1.85E-29 | 1.00E-27 | 179 | 179 |
| C14orf39  | 0.71008132  | 1.55E-29 | 8.42E-28 | 179 | 179 |
| SIX6      | 0.71008132  | 1.55E-29 | 8.42E-28 | 179 | 179 |
| RTN1      | 0.711485142 | 1.07E-29 | 5.85E-28 | 179 | 179 |
| MIR5586   | 0.711485142 | 1.07E-29 | 5.85E-28 | 179 | 179 |
| LRRC9     | 0.711485142 | 1.07E-29 | 5.85E-28 | 179 | 179 |
| PCNXL4    | 0.711485142 | 1.07E-29 | 5.85E-28 | 179 | 179 |
| DHRS7     | 0.711485142 | 1.07E-29 | 5.85E-28 | 179 | 179 |
| PPM1A     | 0.711485142 | 1.07E-29 | 5.85E-28 | 179 | 179 |
| SIX1      | 0.711889287 | 9.61E-30 | 5.33E-28 | 179 | 179 |
| SIX4      | 0.711889287 | 9.61E-30 | 5.33E-28 | 179 | 179 |
| MNAT1     | 0.711889287 | 9.61E-30 | 5.33E-28 | 179 | 179 |
| TRMT5     | 0.711889287 | 9.61E-30 | 5.33E-28 | 179 | 179 |
| SLC38A6   | 0.711889287 | 9.61E-30 | 5.33E-28 | 179 | 179 |
| RPL10L    | 0.712508555 | 8.16E-30 | 4.57E-28 | 179 | 179 |
| RN7SL706F | 0.712566643 | 8.04E-30 | 4.51E-28 | 179 | 179 |
| RN7SL108F | 0.712566643 | 8.04E-30 | 4.51E-28 | 179 | 179 |
| PLEKHG3   | 0.712641768 | 7.88E-30 | 4.45E-28 | 179 | 179 |
| SPTB      | 0.712641768 | 7.88E-30 | 4.45E-28 | 179 | 179 |
| CHURC1    | 0.712641768 | 7.88E-30 | 4.45E-28 | 179 | 179 |
| GPX2      | 0.712641768 | 7.88E-30 | 4.45E-28 | 179 | 179 |
| RAB15     | 0.712641768 | 7.88E-30 | 4.45E-28 | 179 | 179 |
| FNTB      | 0.712641768 | 7.88E-30 | 4.45E-28 | 179 | 179 |
| MIR4706   | 0.712641768 | 7.88E-30 | 4.45E-28 | 179 | 179 |
| PPP1R36   | 0.714105248 | 5.34E-30 | 3.06E-28 | 179 | 179 |
| MED6      | 0.714890272 | 4.33E-30 | 2.49E-28 | 179 | 179 |
| RN7SL77P  | 0.714890272 | 4.33E-30 | 2.49E-28 | 179 | 179 |
| ARG2      | 0.717675213 | 2.05E-30 | 1.18E-28 | 179 | 179 |
| VTI1B     | 0.717675213 | 2.05E-30 | 1.18E-28 | 179 | 179 |
| MIR5694   | 0.717829328 | 1.96E-30 | 1.14E-28 | 179 | 179 |
| TMEM229B  | 0.717829328 | 1.96E-30 | 1.14E-28 | 179 | 179 |
| RAD51B    | 0.719243334 | 1.34E-30 | 7.79E-29 | 179 | 179 |
| SIPA1L1   | 0.719279666 | 1.32E-30 | 7.73E-29 | 179 | 179 |
| LINC00648 | 0.719285935 | 1.32E-30 | 7.73E-29 | 179 | 179 |
| MIR548Y   | 0.719285935 | 1.32E-30 | 7.73E-29 | 179 | 179 |
| ADAM20P1  | 0.719708298 | 1.18E-30 | 6.93E-29 | 179 | 179 |
| SLC39A9   | 0.72056907  | 9.30E-31 | 5.49E-29 | 179 | 179 |
| PLEKHD1   | 0.72056907  | 9.30E-31 | 5.49E-29 | 179 | 179 |
| CCDC177 E | 0.72056907  | 9.30E-31 | 5.49E-29 | 179 | 179 |
| CCDC177 E | 0.72056907  | 9.30E-31 | 5.49E-29 | 179 | 179 |
| KIAA0247  | 0.72056907  | 9.30E-31 | 5.49E-29 | 179 | 179 |
| SNORD56B  | 0.72198535  | 6.30E-31 | 3.76E-29 | 179 | 179 |
| RN7SL683F | 0.722350411 | 5.70E-31 | 3.41E-29 | 179 | 179 |
| ACTN1     | 0.722872743 | 4.93E-31 | 2.96E-29 | 179 | 179 |

|           |             |          |          |     |     |
|-----------|-------------|----------|----------|-----|-----|
| RGS6      | 0.723023568 | 4.73E-31 | 2.84E-29 | 179 | 179 |
| RDH12     | 0.723622476 | 4.01E-31 | 2.41E-29 | 179 | 179 |
| ZFYVE26   | 0.723622476 | 4.01E-31 | 2.41E-29 | 179 | 179 |
| SMOC1     | 0.723743227 | 3.87E-31 | 2.35E-29 | 179 | 179 |
| SLC8A3    | 0.723991738 | 3.61E-31 | 2.20E-29 | 179 | 179 |
| TTC9      | 0.724368705 | 3.25E-31 | 1.98E-29 | 179 | 179 |
| MAP3K9    | 0.724368705 | 3.25E-31 | 1.98E-29 | 179 | 179 |
| PCNX      | 0.724368705 | 3.25E-31 | 1.98E-29 | 179 | 179 |
| ADAM20    | 0.724389547 | 3.24E-31 | 1.98E-29 | 179 | 179 |
| ADAM21P1  | 0.7243934   | 3.23E-31 | 1.98E-29 | 179 | 179 |
| COX16     | 0.7243934   | 3.23E-31 | 1.98E-29 | 179 | 179 |
| SYNJ2BP   | 0.7243934   | 3.23E-31 | 1.98E-29 | 179 | 179 |
| ADAM21    | 0.7243934   | 3.23E-31 | 1.98E-29 | 179 | 179 |
| DCAF5     | 0.728490587 | 1.02E-31 | 6.34E-30 | 179 | 179 |
| SNORA25 E | 0.729538476 | 7.58E-32 | 4.72E-30 | 179 | 179 |
| PIGH      | 0.731185323 | 4.73E-32 | 2.95E-30 | 179 | 179 |
| U3 ENSGOC | 0.731378319 | 4.47E-32 | 2.80E-30 | 179 | 179 |
| RN7SL213F | 0.731378319 | 4.47E-32 | 2.80E-30 | 179 | 179 |
| NEK9      | 0.73312653  | 2.70E-32 | 1.70E-30 | 179 | 179 |
| TMED10    | 0.73312653  | 2.70E-32 | 1.70E-30 | 179 | 179 |
| RDH11     | 0.733334618 | 2.54E-32 | 1.61E-30 | 179 | 179 |
| RN7SL369F | 0.733334618 | 2.54E-32 | 1.61E-30 | 179 | 179 |
| RN7SL356F | 0.73345014  | 2.46E-32 | 1.56E-30 | 179 | 179 |
| C14orf166 | 0.733703468 | 2.28E-32 | 1.45E-30 | 179 | 179 |
| RN7SKP17  | 0.733703468 | 2.28E-32 | 1.45E-30 | 179 | 179 |
| RN7SL224F | 0.736270156 | 1.08E-32 | 6.91E-31 | 179 | 179 |
| ZFP36L1   | 0.737983723 | 6.51E-33 | 4.18E-31 | 179 | 179 |
| ELMSAN1   | 0.739286079 | 4.42E-33 | 2.84E-31 | 179 | 179 |
| snoU13 EN | 0.739286079 | 4.42E-33 | 2.84E-31 | 179 | 179 |
| SRSF5     | 0.739785298 | 3.81E-33 | 2.46E-31 | 179 | 179 |
| SLC10A1   | 0.739785298 | 3.81E-33 | 2.46E-31 | 179 | 179 |
| SNORA11 E | 0.739785298 | 3.81E-33 | 2.46E-31 | 179 | 179 |
| EXD2      | 0.739789151 | 3.80E-33 | 2.46E-31 | 179 | 179 |
| GALNT16   | 0.739789151 | 3.80E-33 | 2.46E-31 | 179 | 179 |
| ERH       | 0.739789151 | 3.80E-33 | 2.46E-31 | 179 | 179 |
| RBM25     | 0.74037609  | 3.19E-33 | 2.10E-31 | 179 | 179 |
| PSEN1     | 0.74037609  | 3.19E-33 | 2.10E-31 | 179 | 179 |
| IRF2BPL   | 0.744398135 | 9.46E-34 | 6.25E-32 | 179 | 179 |
| KIAA1737  | 0.744398135 | 9.46E-34 | 6.25E-32 | 179 | 179 |
| TMEM63C   | 0.744398135 | 9.46E-34 | 6.25E-32 | 179 | 179 |
| ZDHHC22   | 0.744398135 | 9.46E-34 | 6.25E-32 | 179 | 179 |
| SNORA32 E | 0.744398135 | 9.46E-34 | 6.25E-32 | 179 | 179 |
| RNU4ATAC1 | 0.745170649 | 7.47E-34 | 5.00E-32 | 179 | 179 |
| FOS       | 0.745170649 | 7.47E-34 | 5.00E-32 | 179 | 179 |
| VASH1     | 0.746051989 | 5.70E-34 | 3.84E-32 | 179 | 179 |
| ANGEL1    | 0.746051989 | 5.70E-34 | 3.84E-32 | 179 | 179 |
| DPF3      | 0.750463912 | 1.45E-34 | 9.79E-33 | 179 | 179 |
| RN7SL586F | 0.751095184 | 1.19E-34 | 8.05E-33 | 179 | 179 |
| ACYP1     | 0.751178021 | 1.16E-34 | 7.86E-33 | 179 | 179 |
| ZC2HC1C   | 0.751178021 | 1.16E-34 | 7.86E-33 | 179 | 179 |
| snoU13 EN | 0.751213298 | 1.14E-34 | 7.82E-33 | 179 | 179 |

|           |             |          |          |     |     |
|-----------|-------------|----------|----------|-----|-----|
| DCAF4     | 0.751213298 | 1.14E-34 | 7.82E-33 | 179 | 179 |
| ZFYVE1    | 0.751213298 | 1.14E-34 | 7.82E-33 | 179 | 179 |
| PNMA1     | 0.751993269 | 8.93E-35 | 6.16E-33 | 179 | 179 |
| MIR4505   | 0.751993269 | 8.93E-35 | 6.16E-33 | 179 | 179 |
| EIF2B2    | 0.754239141 | 4.37E-35 | 3.03E-33 | 179 | 179 |
| MLH3      | 0.754239141 | 4.37E-35 | 3.03E-33 | 179 | 179 |
| AHSA1     | 0.756848758 | 1.89E-35 | 1.32E-33 | 179 | 179 |
| SNORA46 E | 0.756848758 | 1.89E-35 | 1.32E-33 | 179 | 179 |
| ISM2      | 0.756848758 | 1.89E-35 | 1.32E-33 | 179 | 179 |
| MIR1260A  | 0.756850684 | 1.89E-35 | 1.32E-33 | 179 | 179 |
| NGB       | 0.756850684 | 1.89E-35 | 1.32E-33 | 179 | 179 |
| POMT2     | 0.756850684 | 1.89E-35 | 1.32E-33 | 179 | 179 |
| GSTZ1     | 0.756850684 | 1.89E-35 | 1.32E-33 | 179 | 179 |
| TMED8     | 0.756850684 | 1.89E-35 | 1.32E-33 | 179 | 179 |
| RN7SL137F | 0.756850684 | 1.89E-35 | 1.32E-33 | 179 | 179 |
| SAMD15    | 0.756850684 | 1.89E-35 | 1.32E-33 | 179 | 179 |
| NOXRED1   | 0.756850684 | 1.89E-35 | 1.32E-33 | 179 | 179 |
| FKSG61    | 0.756850684 | 1.89E-35 | 1.32E-33 | 179 | 179 |
| VIPAS39   | 0.757463294 | 1.55E-35 | 1.12E-33 | 179 | 179 |
| JDP2      | 0.762076284 | 3.40E-36 | 2.46E-34 | 179 | 179 |
| BATF      | 0.762076284 | 3.40E-36 | 2.46E-34 | 179 | 179 |
| TGFB3     | 0.762666626 | 2.80E-36 | 2.04E-34 | 179 | 179 |
| ESRRB     | 0.763494998 | 2.12E-36 | 1.55E-34 | 179 | 179 |
| RN7SL747F | 0.763494998 | 2.12E-36 | 1.55E-34 | 179 | 179 |
| FLVCR2    | 0.765111399 | 1.23E-36 | 9.06E-35 | 179 | 179 |
| RNA5SP387 | 0.765111399 | 1.23E-36 | 9.06E-35 | 179 | 179 |
| TLL5      | 0.765111399 | 1.23E-36 | 9.06E-35 | 179 | 179 |
| C14orf1   | 0.765111399 | 1.23E-36 | 9.06E-35 | 179 | 179 |
| NPC2      | 0.765800698 | 9.76E-37 | 7.26E-35 | 179 | 179 |
| MIR4709   | 0.765800698 | 9.76E-37 | 7.26E-35 | 179 | 179 |
| ISCA2     | 0.765800698 | 9.76E-37 | 7.26E-35 | 179 | 179 |
| LTBP2     | 0.765800698 | 9.76E-37 | 7.26E-35 | 179 | 179 |
| AREL1     | 0.765800698 | 9.76E-37 | 7.26E-35 | 179 | 179 |
| FCF1      | 0.765800698 | 9.76E-37 | 7.26E-35 | 179 | 179 |
| SNORA7 EN | 0.765800698 | 9.76E-37 | 7.26E-35 | 179 | 179 |
| YLPM1     | 0.765800698 | 9.76E-37 | 7.26E-35 | 179 | 179 |
| PROX2     | 0.765800698 | 9.76E-37 | 7.26E-35 | 179 | 179 |
| DLST      | 0.765800698 | 9.76E-37 | 7.26E-35 | 179 | 179 |
| RPS6KL1   | 0.765800698 | 9.76E-37 | 7.26E-35 | 179 | 179 |
| PGF       | 0.765800698 | 9.76E-37 | 7.26E-35 | 179 | 179 |
| PAPLN     | 0.765999122 | 9.13E-37 | 7.05E-35 | 179 | 179 |
| NUMB      | 0.765999122 | 9.13E-37 | 7.05E-35 | 179 | 179 |
| ACOT6     | 0.766788964 | 6.98E-37 | 5.42E-35 | 179 | 179 |
| DNAL1     | 0.766788964 | 6.98E-37 | 5.42E-35 | 179 | 179 |
| HEATR4    | 0.767287913 | 5.89E-37 | 4.60E-35 | 179 | 179 |
| C14orf169 | 0.767287913 | 5.89E-37 | 4.60E-35 | 179 | 179 |
| ACOT1     | 0.767287913 | 5.89E-37 | 4.60E-35 | 179 | 179 |
| ACOT2     | 0.767287913 | 5.89E-37 | 4.60E-35 | 179 | 179 |
| ACOT4     | 0.767287913 | 5.89E-37 | 4.60E-35 | 179 | 179 |
| SPTLC2    | 0.774119349 | 5.51E-38 | 4.38E-36 | 179 | 179 |
| RN7SL587F | 0.774119349 | 5.51E-38 | 4.38E-36 | 179 | 179 |

|           |             |          |          |     |     |
|-----------|-------------|----------|----------|-----|-----|
| ALKBH1    | 0.774119349 | 5.51E-38 | 4.38E-36 | 179 | 179 |
| SLIRP     | 0.774119349 | 5.51E-38 | 4.38E-36 | 179 | 179 |
| SNW1      | 0.774119349 | 5.51E-38 | 4.38E-36 | 179 | 179 |
| C14orf178 | 0.774119349 | 5.51E-38 | 4.38E-36 | 179 | 179 |
| ADCK1     | 0.774123202 | 5.51E-38 | 4.38E-36 | 179 | 179 |
| IFT43     | 0.776785551 | 2.14E-38 | 1.74E-36 | 179 | 179 |
| GPATCH2L  | 0.776787477 | 2.14E-38 | 1.74E-36 | 179 | 179 |
| COQ6      | 0.778187736 | 1.29E-38 | 1.06E-36 | 179 | 179 |
| ENTPD5    | 0.778187736 | 1.29E-38 | 1.06E-36 | 179 | 179 |
| CCDC176   | 0.778187736 | 1.29E-38 | 1.06E-36 | 179 | 179 |
| ALDH6A1   | 0.778187736 | 1.29E-38 | 1.06E-36 | 179 | 179 |
| LIN52     | 0.778187736 | 1.29E-38 | 1.06E-36 | 179 | 179 |
| RN7SL530F | 0.778187736 | 1.29E-38 | 1.06E-36 | 179 | 179 |
| VSX2      | 0.778187736 | 1.29E-38 | 1.06E-36 | 179 | 179 |
| ABCD4     | 0.778187736 | 1.29E-38 | 1.06E-36 | 179 | 179 |
| VRTN      | 0.778187736 | 1.29E-38 | 1.06E-36 | 179 | 179 |
| SYNDIG1L  | 0.778187736 | 1.29E-38 | 1.06E-36 | 179 | 179 |
| ZNF410    | 0.778741964 | 1.06E-38 | 8.95E-37 | 179 | 179 |
| FAM161B   | 0.778741964 | 1.06E-38 | 8.95E-37 | 179 | 179 |
| PTGR2     | 0.778791676 | 1.04E-38 | 8.85E-37 | 179 | 179 |
| NRXN3     | 0.786006314 | 7.28E-40 | 6.22E-38 | 179 | 179 |
| RNA5SP388 | 0.796333202 | 1.35E-41 | 1.16E-39 | 179 | 179 |
| CEP128    | 0.800211234 | 2.84E-42 | 2.44E-40 | 179 | 179 |
| AKT1      | 0.871015748 | 4.45E-58 | 3.84E-56 | 179 | 179 |
| ZBTB42    | 0.871015748 | 4.45E-58 | 3.84E-56 | 179 | 179 |
| LINC00638 | 0.871015748 | 4.45E-58 | 3.84E-56 | 179 | 179 |
| MIR4710   | 0.880647979 | 6.02E-61 | 5.25E-59 | 179 | 179 |
| GTF2A1    | 0.881752372 | 2.72E-61 | 2.38E-59 | 179 | 179 |
| TMEM179   | 0.882568647 | 1.51E-61 | 1.32E-59 | 179 | 179 |
| C14orf18C | 0.882568647 | 1.51E-61 | 1.32E-59 | 179 | 179 |
| SNORA11B  | 0.882893309 | 1.19E-61 | 1.05E-59 | 179 | 179 |
| RN7SL506F | 0.882893309 | 1.19E-61 | 1.05E-59 | 179 | 179 |
| INF2      | 0.883117684 | 1.01E-61 | 8.99E-60 | 179 | 179 |
| SNORA79 E | 0.883647994 | 6.84E-62 | 6.11E-60 | 179 | 179 |
| STON2     | 0.883647994 | 6.84E-62 | 6.11E-60 | 179 | 179 |
| SEL1L     | 0.883647994 | 6.84E-62 | 6.11E-60 | 179 | 179 |
| FLRT2     | 0.883825988 | 6.00E-62 | 5.42E-60 | 179 | 179 |
| snoU13 EN | 0.883956225 | 5.45E-62 | 4.94E-60 | 179 | 179 |
| ADSSL1    | 0.884302448 | 4.22E-62 | 3.84E-60 | 179 | 179 |
| SIVA1     | 0.884947808 | 2.61E-62 | 2.39E-60 | 179 | 179 |
| DIO2      | 0.887680634 | 3.34E-63 | 3.06E-61 | 179 | 179 |
| TSHR      | 0.889649835 | 7.32E-64 | 6.74E-62 | 179 | 179 |
| RNU6ATAC2 | 0.890863601 | 2.83E-64 | 2.62E-62 | 179 | 179 |
| ZFYVE21   | 0.891254993 | 2.08E-64 | 1.93E-62 | 179 | 179 |
| RNU3P3    | 0.892902741 | 5.60E-65 | 5.22E-63 | 179 | 179 |
| LINC00911 | 0.892992321 | 5.21E-65 | 4.87E-63 | 179 | 179 |
| FOXN3     | 0.895738265 | 5.57E-66 | 5.23E-64 | 179 | 179 |
| FBLN5     | 0.898117044 | 7.62E-67 | 7.18E-65 | 179 | 179 |
| RPS6KA5   | 0.902384121 | 1.90E-68 | 1.79E-66 | 179 | 179 |
| C14orf159 | 0.902402422 | 1.87E-68 | 1.77E-66 | 179 | 179 |
| KCNK10    | 0.907086574 | 2.64E-70 | 2.52E-68 | 179 | 179 |

|           |             |          |          |     |     |
|-----------|-------------|----------|----------|-----|-----|
| JAG2      | 0.908860349 | 4.97E-71 | 4.75E-69 | 179 | 179 |
| NUDT14    | 0.908860349 | 4.97E-71 | 4.75E-69 | 179 | 179 |
| BRF1      | 0.909212888 | 3.55E-71 | 3.42E-69 | 179 | 179 |
| CEP170B   | 0.909490734 | 2.72E-71 | 2.63E-69 | 179 | 179 |
| PLD4      | 0.909490734 | 2.72E-71 | 2.63E-69 | 179 | 179 |
| AHNAK2    | 0.909490734 | 2.72E-71 | 2.63E-69 | 179 | 179 |
| C14orf79  | 0.909490734 | 2.72E-71 | 2.63E-69 | 179 | 179 |
| RIN3      | 0.910480008 | 1.05E-71 | 1.03E-69 | 179 | 179 |
| LGMN      | 0.910480008 | 1.05E-71 | 1.03E-69 | 179 | 179 |
| GOLGA5    | 0.910480008 | 1.05E-71 | 1.03E-69 | 179 | 179 |
| PPP1R13B  | 0.910540648 | 9.88E-72 | 9.83E-70 | 179 | 179 |
| GPR132    | 0.912670334 | 1.22E-72 | 1.22E-70 | 179 | 179 |
| CDCA4     | 0.91281867  | 1.05E-72 | 1.05E-70 | 179 | 179 |
| SPATA7    | 0.916274755 | 3.11E-74 | 3.13E-72 | 179 | 179 |
| PTPN21    | 0.916274755 | 3.11E-74 | 3.13E-72 | 179 | 179 |
| GALC      | 0.917334261 | 1.02E-74 | 1.04E-72 | 179 | 179 |
| GPR65     | 0.917334261 | 1.02E-74 | 1.04E-72 | 179 | 179 |
| GPR68     | 0.91742099  | 9.35E-75 | 9.57E-73 | 179 | 179 |
| CCDC88C   | 0.91742099  | 9.35E-75 | 9.57E-73 | 179 | 179 |
| EML5      | 0.917535574 | 8.28E-75 | 8.55E-73 | 179 | 179 |
| TTC8      | 0.91862498  | 2.60E-75 | 2.69E-73 | 179 | 179 |
| TDRD9     | 0.921048449 | 1.86E-76 | 1.93E-74 | 179 | 179 |
| SNORD51 E | 0.921125507 | 1.70E-76 | 1.78E-74 | 179 | 179 |
| TTC7B     | 0.921516094 | 1.10E-76 | 1.16E-74 | 179 | 179 |
| SMEK1     | 0.921660134 | 9.40E-77 | 9.91E-75 | 179 | 179 |
| CATSPERB  | 0.921660134 | 9.40E-77 | 9.91E-75 | 179 | 179 |
| CDC42BPB  | 0.921848368 | 7.62E-77 | 8.10E-75 | 179 | 179 |
| RN7SL634F | 0.921951953 | 6.79E-77 | 7.25E-75 | 179 | 179 |
| ASPG      | 0.921951953 | 6.79E-77 | 7.25E-75 | 179 | 179 |
| C14orf2   | 0.923298539 | 1.48E-77 | 1.60E-75 | 179 | 179 |
| U3 ENSGOC | 0.923390082 | 1.34E-77 | 1.44E-75 | 179 | 179 |
| TC2N      | 0.923390082 | 1.34E-77 | 1.44E-75 | 179 | 179 |
| TRIP11    | 0.923558646 | 1.10E-77 | 1.20E-75 | 179 | 179 |
| ATXN3     | 0.923558646 | 1.10E-77 | 1.20E-75 | 179 | 179 |
| NDUFB1    | 0.923558646 | 1.10E-77 | 1.20E-75 | 179 | 179 |
| MIR203    | 0.924134616 | 5.68E-78 | 6.29E-76 | 179 | 179 |
| KIF26A    | 0.924134616 | 5.68E-78 | 6.29E-76 | 179 | 179 |
| C14orf144 | 0.924134616 | 5.68E-78 | 6.29E-76 | 179 | 179 |
| RD3L      | 0.924202042 | 5.26E-78 | 5.89E-76 | 179 | 179 |
| CHGA      | 0.925082464 | 1.89E-78 | 2.13E-76 | 179 | 179 |
| FAM181A   | 0.92664729  | 2.98E-79 | 3.37E-77 | 179 | 179 |
| LINC00637 | 0.926656334 | 2.95E-79 | 3.35E-77 | 179 | 179 |
| PSMC1     | 0.926962569 | 2.04E-79 | 2.33E-77 | 179 | 179 |
| NRDE2     | 0.927035328 | 1.87E-79 | 2.15E-77 | 179 | 179 |
| ZC3H14    | 0.927993701 | 5.87E-80 | 6.77E-78 | 179 | 179 |
| BTBD6     | 0.928555363 | 2.95E-80 | 3.42E-78 | 179 | 179 |
| MOAP1     | 0.929121257 | 1.47E-80 | 1.71E-78 | 179 | 179 |
| TMEM251   | 0.929121257 | 1.47E-80 | 1.71E-78 | 179 | 179 |
| C14orf142 | 0.929121257 | 1.47E-80 | 1.71E-78 | 179 | 179 |
| UBR7      | 0.929121257 | 1.47E-80 | 1.71E-78 | 179 | 179 |
| BTBD7     | 0.929121257 | 1.47E-80 | 1.71E-78 | 179 | 179 |

|           |             |          |          |     |     |
|-----------|-------------|----------|----------|-----|-----|
| ITPK1     | 0.92929849  | 1.18E-80 | 1.41E-78 | 179 | 179 |
| PRIMA1    | 0.929942438 | 5.29E-81 | 6.33E-79 | 179 | 179 |
| ASB2      | 0.929943435 | 5.28E-81 | 6.33E-79 | 179 | 179 |
| MIR4506   | 0.929943435 | 5.28E-81 | 6.33E-79 | 179 | 179 |
| AMN       | 0.930063703 | 4.54E-81 | 5.52E-79 | 179 | 179 |
| TRAF3     | 0.930277538 | 3.47E-81 | 4.24E-79 | 179 | 179 |
| CALM1     | 0.935910501 | 2.11E-84 | 2.59E-82 | 179 | 179 |
| LINC00642 | 0.935910501 | 2.11E-84 | 2.59E-82 | 179 | 179 |
| TEX22     | 0.93758365  | 2.05E-85 | 2.54E-83 | 179 | 179 |
| MTA1      | 0.93758365  | 2.05E-85 | 2.54E-83 | 179 | 179 |
| CRIP2     | 0.937732949 | 1.66E-85 | 2.08E-83 | 179 | 179 |
| C14orf80  | 0.937732949 | 1.66E-85 | 2.08E-83 | 179 | 179 |
| CRIP1     | 0.937732949 | 1.66E-85 | 2.08E-83 | 179 | 179 |
| ADAM6     | 0.937732949 | 1.66E-85 | 2.08E-83 | 179 | 179 |
| IGHA1     | 0.937732949 | 1.66E-85 | 2.08E-83 | 179 | 179 |
| IGHA2     | 0.937732949 | 1.66E-85 | 2.08E-83 | 179 | 179 |
| IGHD      | 0.937732949 | 1.66E-85 | 2.08E-83 | 179 | 179 |
| IGHE      | 0.937732949 | 1.66E-85 | 2.08E-83 | 179 | 179 |
| IGHG1     | 0.937732949 | 1.66E-85 | 2.08E-83 | 179 | 179 |
| IGHG2     | 0.937732949 | 1.66E-85 | 2.08E-83 | 179 | 179 |
| IGHG3     | 0.937732949 | 1.66E-85 | 2.08E-83 | 179 | 179 |
| IGHG4     | 0.937732949 | 1.66E-85 | 2.08E-83 | 179 | 179 |
| IGHJ1     | 0.937732949 | 1.66E-85 | 2.08E-83 | 179 | 179 |
| IGHJ2     | 0.937732949 | 1.66E-85 | 2.08E-83 | 179 | 179 |
| IGHJ3     | 0.937732949 | 1.66E-85 | 2.08E-83 | 179 | 179 |
| IGHJ4     | 0.937732949 | 1.66E-85 | 2.08E-83 | 179 | 179 |
| IGHJ5     | 0.937732949 | 1.66E-85 | 2.08E-83 | 179 | 179 |
| IGHJ6     | 0.937732949 | 1.66E-85 | 2.08E-83 | 179 | 179 |
| IGHM      | 0.937732949 | 1.66E-85 | 2.08E-83 | 179 | 179 |
| KIAA0125  | 0.937732949 | 1.66E-85 | 2.08E-83 | 179 | 179 |
| LINC00221 | 0.937732949 | 1.66E-85 | 2.08E-83 | 179 | 179 |
| LINC00226 | 0.937732949 | 1.66E-85 | 2.08E-83 | 179 | 179 |
| RNA5SP389 | 0.937732949 | 1.66E-85 | 2.08E-83 | 179 | 179 |
| TMEM121   | 0.937732949 | 1.66E-85 | 2.08E-83 | 179 | 179 |
| UNC79     | 0.938753484 | 3.87E-86 | 5.51E-84 | 179 | 179 |
| COX8C     | 0.938753484 | 3.87E-86 | 5.51E-84 | 179 | 179 |
| MARK3     | 0.938959073 | 2.87E-86 | 4.14E-84 | 179 | 179 |
| XRCC3     | 0.939245661 | 1.90E-86 | 2.75E-84 | 179 | 179 |
| snoU13 EN | 0.939575989 | 1.17E-86 | 1.71E-84 | 179 | 179 |
| EIF5      | 0.940107236 | 5.38E-87 | 7.89E-85 | 179 | 179 |
| SNORA28   | 0.940107236 | 5.38E-87 | 7.89E-85 | 179 | 179 |
| PACS2     | 0.94188155  | 3.78E-88 | 5.61E-86 | 179 | 179 |
| ZNF839    | 0.943452993 | 3.36E-89 | 5.01E-87 | 179 | 179 |
| CINP      | 0.943452993 | 3.36E-89 | 5.01E-87 | 179 | 179 |
| snoU13 EN | 0.943452993 | 3.36E-89 | 5.01E-87 | 179 | 179 |
| TECPR2    | 0.943452993 | 3.36E-89 | 5.01E-87 | 179 | 179 |
| MOK       | 0.943574359 | 2.78E-89 | 4.24E-87 | 179 | 179 |
| RN7SKP107 | 0.94454577  | 5.97E-90 | 9.19E-88 | 179 | 179 |
| U3 ENSGOC | 0.946033469 | 5.38E-91 | 8.34E-89 | 179 | 179 |
| LINC00524 | 0.946033469 | 5.38E-91 | 8.34E-89 | 179 | 179 |
| DIO3OS    | 0.946033469 | 5.38E-91 | 8.34E-89 | 179 | 179 |

|           |             |           |           |     |     |
|-----------|-------------|-----------|-----------|-----|-----|
| DIO3      | 0.946033469 | 5.38E-91  | 8.34E-89  | 179 | 179 |
| PPP2R5C   | 0.946033469 | 5.38E-91  | 8.34E-89  | 179 | 179 |
| EXOC3L4   | 0.946800677 | 1.52E-91  | 2.42E-89  | 179 | 179 |
| LINC00677 | 0.946800677 | 1.52E-91  | 2.42E-89  | 179 | 179 |
| TNFAIP2   | 0.946800677 | 1.52E-91  | 2.42E-89  | 179 | 179 |
| LINC0060E | 0.946800677 | 1.52E-91  | 2.42E-89  | 179 | 179 |
| TDP1      | 0.947059784 | 9.83E-92  | 1.61E-89  | 179 | 179 |
| CPSF2     | 0.948945343 | 3.95E-93  | 6.53E-91  | 179 | 179 |
| HSP90AA1  | 0.950099236 | 5.20E-94  | 8.65E-92  | 179 | 179 |
| WDR20     | 0.950099236 | 5.20E-94  | 8.65E-92  | 179 | 179 |
| SLC24A4   | 0.950189827 | 4.43E-94  | 7.46E-92  | 179 | 179 |
| MIR4309   | 0.950269245 | 3.84E-94  | 6.52E-92  | 179 | 179 |
| ANKRD9    | 0.950808169 | 1.46E-94  | 2.50E-92  | 179 | 179 |
| TCL6      | 0.951047119 | 9.49E-95  | 1.63E-92  | 179 | 179 |
| RCOR1     | 0.951139999 | 8.01E-95  | 1.39E-92  | 179 | 179 |
| RN7SKP25E | 0.952455763 | 7.10E-96  | 1.24E-93  | 179 | 179 |
| EFCAB11   | 0.952457689 | 7.07E-96  | 1.24E-93  | 179 | 179 |
| KCNK13    | 0.952547728 | 5.97E-96  | 1.06E-93  | 179 | 179 |
| CKB       | 0.953698825 | 6.74E-97  | 1.20E-94  | 179 | 179 |
| TRMT61A   | 0.953698825 | 6.74E-97  | 1.20E-94  | 179 | 179 |
| BAG5      | 0.953698825 | 6.74E-97  | 1.20E-94  | 179 | 179 |
| KLC1      | 0.953698825 | 6.74E-97  | 1.20E-94  | 179 | 179 |
| APOPT1    | 0.953698825 | 6.74E-97  | 1.20E-94  | 179 | 179 |
| CLMN      | 0.955951847 | 7.97E-99  | 1.47E-96  | 179 | 179 |
| LINC00341 | 0.955951847 | 7.97E-99  | 1.47E-96  | 179 | 179 |
| SYNE3     | 0.955951847 | 7.97E-99  | 1.47E-96  | 179 | 179 |
| SNHG10    | 0.955951847 | 7.97E-99  | 1.47E-96  | 179 | 179 |
| SCARNA13  | 0.955951847 | 7.97E-99  | 1.47E-96  | 179 | 179 |
| GLRX5     | 0.955951847 | 7.97E-99  | 1.47E-96  | 179 | 179 |
| TCL1B     | 0.955957626 | 7.88E-99  | 1.47E-96  | 179 | 179 |
| TCL1A     | 0.955957626 | 7.88E-99  | 1.47E-96  | 179 | 179 |
| LINC00521 | 0.956551473 | 2.35E-99  | 4.63E-97  | 179 | 179 |
| PPP4R4    | 0.959957926 | 1.63E-102 | 3.23E-100 | 179 | 179 |
| SERPINA1C | 0.959957926 | 1.63E-102 | 3.23E-100 | 179 | 179 |
| SERPINA6  | 0.959957926 | 1.63E-102 | 3.23E-100 | 179 | 179 |
| RN7SL472F | 0.961634802 | 3.59E-104 | 7.28E-102 | 179 | 179 |
| DYNC1H1   | 0.961640582 | 3.54E-104 | 7.25E-102 | 179 | 179 |
| SERPINA1  | 0.962943413 | 1.62E-105 | 3.34E-103 | 179 | 179 |
| SERPINA11 | 0.962943413 | 1.62E-105 | 3.34E-103 | 179 | 179 |
| SERPINA9  | 0.962943413 | 1.62E-105 | 3.34E-103 | 179 | 179 |
| SERPINA12 | 0.962943413 | 1.62E-105 | 3.34E-103 | 179 | 179 |
| SERPINA4  | 0.962943413 | 1.62E-105 | 3.34E-103 | 179 | 179 |
| SERPINA5  | 0.962943413 | 1.62E-105 | 3.34E-103 | 179 | 179 |
| SERPINA3  | 0.962943413 | 1.62E-105 | 3.34E-103 | 179 | 179 |
| SERPINA13 | 0.962943413 | 1.62E-105 | 3.34E-103 | 179 | 179 |
| GSC       | 0.96297759  | 1.49E-105 | 3.30E-103 | 179 | 179 |
| OTUB2     | 0.965363026 | 3.87E-108 | 8.64E-106 | 179 | 179 |
| DDX24     | 0.965363026 | 3.87E-108 | 8.64E-106 | 179 | 179 |
| IFI27L1   | 0.965363026 | 3.87E-108 | 8.64E-106 | 179 | 179 |
| IFI27     | 0.965363026 | 3.87E-108 | 8.64E-106 | 179 | 179 |
| IFI27L2   | 0.965363026 | 3.87E-108 | 8.64E-106 | 179 | 179 |

|           |             |           |           |     |     |
|-----------|-------------|-----------|-----------|-----|-----|
| LINC00523 | 0.967627017 | 9.14E-111 | 2.14E-108 | 179 | 179 |
| DLK1      | 0.967627017 | 9.14E-111 | 2.14E-108 | 179 | 179 |
| MEG3      | 0.967627017 | 9.14E-111 | 2.14E-108 | 179 | 179 |
| MIR2392   | 0.967627017 | 9.14E-111 | 2.14E-108 | 179 | 179 |
| MIR770    | 0.967627017 | 9.14E-111 | 2.14E-108 | 179 | 179 |
| MIR493    | 0.967627017 | 9.14E-111 | 2.14E-108 | 179 | 179 |
| MIR337    | 0.967627017 | 9.14E-111 | 2.14E-108 | 179 | 179 |
| MIR431    | 0.967627017 | 9.14E-111 | 2.14E-108 | 179 | 179 |
| MIR433    | 0.967627017 | 9.14E-111 | 2.14E-108 | 179 | 179 |
| MIR665    | 0.967627017 | 9.14E-111 | 2.14E-108 | 179 | 179 |
| RTL1      | 0.967627017 | 9.14E-111 | 2.14E-108 | 179 | 179 |
| MIR127    | 0.967627017 | 9.14E-111 | 2.14E-108 | 179 | 179 |
| MIR136    | 0.967627017 | 9.14E-111 | 2.14E-108 | 179 | 179 |
| MIR432    | 0.967627017 | 9.14E-111 | 2.14E-108 | 179 | 179 |
| MEG8      | 0.967627017 | 9.14E-111 | 2.14E-108 | 179 | 179 |
| MIR370    | 0.967627017 | 9.14E-111 | 2.14E-108 | 179 | 179 |
| SNORD112  | 0.967627017 | 9.14E-111 | 2.14E-108 | 179 | 179 |
| SNORD112  | 0.967627017 | 9.14E-111 | 2.14E-108 | 179 | 179 |
| SNORD112  | 0.967627017 | 9.14E-111 | 2.14E-108 | 179 | 179 |
| SNORD112  | 0.967627017 | 9.14E-111 | 2.14E-108 | 179 | 179 |
| SNORD112  | 0.967627017 | 9.14E-111 | 2.14E-108 | 179 | 179 |
| SNORD113  | 0.967627017 | 9.14E-111 | 2.14E-108 | 179 | 179 |
| SNORD113  | 0.967627017 | 9.14E-111 | 2.14E-108 | 179 | 179 |
| SNORD113  | 0.967627017 | 9.14E-111 | 2.14E-108 | 179 | 179 |
| SNORD113  | 0.967627017 | 9.14E-111 | 2.14E-108 | 179 | 179 |
| SNORD113  | 0.967627017 | 9.14E-111 | 2.14E-108 | 179 | 179 |
| SNORD112  | 0.967627017 | 9.14E-111 | 2.14E-108 | 179 | 179 |
| SNORD113  | 0.967627017 | 9.14E-111 | 2.14E-108 | 179 | 179 |
| MIR379    | 0.967627017 | 9.14E-111 | 2.14E-108 | 179 | 179 |
| MIR411    | 0.967627017 | 9.14E-111 | 2.14E-108 | 179 | 179 |
| MIR299    | 0.967627017 | 9.14E-111 | 2.14E-108 | 179 | 179 |
| MIR380    | 0.967627017 | 9.14E-111 | 2.14E-108 | 179 | 179 |
| MIR1197   | 0.967627017 | 9.14E-111 | 2.14E-108 | 179 | 179 |
| MIR323A   | 0.967627017 | 9.14E-111 | 2.14E-108 | 179 | 179 |
| MIR758    | 0.967627017 | 9.14E-111 | 2.14E-108 | 179 | 179 |
| MIR1193   | 0.967627017 | 9.14E-111 | 2.14E-108 | 179 | 179 |
| MIR494    | 0.967627017 | 9.14E-111 | 2.14E-108 | 179 | 179 |
| MIR495    | 0.967627017 | 9.14E-111 | 2.14E-108 | 179 | 179 |
| MIR543    | 0.967627017 | 9.14E-111 | 2.14E-108 | 179 | 179 |
| MIR300    | 0.967627017 | 9.14E-111 | 2.14E-108 | 179 | 179 |
| MIR376A1  | 0.967627017 | 9.14E-111 | 2.14E-108 | 179 | 179 |
| MIR376C   | 0.967627017 | 9.14E-111 | 2.14E-108 | 179 | 179 |
| MIR654    | 0.967627017 | 9.14E-111 | 2.14E-108 | 179 | 179 |
| MIR381HG  | 0.967627017 | 9.14E-111 | 2.14E-108 | 179 | 179 |
| MIR381    | 0.967627017 | 9.14E-111 | 2.14E-108 | 179 | 179 |
| MIR487B   | 0.967627017 | 9.14E-111 | 2.14E-108 | 179 | 179 |
| MIR539    | 0.967627017 | 9.14E-111 | 2.14E-108 | 179 | 179 |
| MIR889    | 0.967627017 | 9.14E-111 | 2.14E-108 | 179 | 179 |
| MIR544A   | 0.967627017 | 9.14E-111 | 2.14E-108 | 179 | 179 |
| MIR655    | 0.967627017 | 9.14E-111 | 2.14E-108 | 179 | 179 |
| MIR487A   | 0.967627017 | 9.14E-111 | 2.14E-108 | 179 | 179 |

|           |             |           |           |     |     |
|-----------|-------------|-----------|-----------|-----|-----|
| MIR134    | 0.967627017 | 9.14E-111 | 2.14E-108 | 179 | 179 |
| MIR382    | 0.967627017 | 9.14E-111 | 2.14E-108 | 179 | 179 |
| MIR485    | 0.967627017 | 9.14E-111 | 2.14E-108 | 179 | 179 |
| MIR323B   | 0.967627017 | 9.14E-111 | 2.14E-108 | 179 | 179 |
| MIR154    | 0.967627017 | 9.14E-111 | 2.14E-108 | 179 | 179 |
| MIR377    | 0.967627017 | 9.14E-111 | 2.14E-108 | 179 | 179 |
| MIR496    | 0.967627017 | 9.14E-111 | 2.14E-108 | 179 | 179 |
| MIR369    | 0.967627017 | 9.14E-111 | 2.14E-108 | 179 | 179 |
| MIR409    | 0.967627017 | 9.14E-111 | 2.14E-108 | 179 | 179 |
| MIR410    | 0.967627017 | 9.14E-111 | 2.14E-108 | 179 | 179 |
| MIR412    | 0.967627017 | 9.14E-111 | 2.14E-108 | 179 | 179 |
| MIR541    | 0.967627017 | 9.14E-111 | 2.14E-108 | 179 | 179 |
| MIR656    | 0.967627017 | 9.14E-111 | 2.14E-108 | 179 | 179 |
| MEG9      | 0.967627017 | 9.14E-111 | 2.14E-108 | 179 | 179 |
| RN7SL546F | 0.968219881 | 1.75E-111 | 1.06E-108 | 179 | 179 |
| LINC00617 | 0.968316731 | 1.33E-111 | 8.23E-109 | 179 | 179 |
| C14orf132 | 0.968316731 | 1.33E-111 | 8.23E-109 | 179 | 179 |
| DICER1    | 0.968484331 | 8.26E-112 | 5.39E-109 | 179 | 179 |
| MIR3173   | 0.968484331 | 8.26E-112 | 5.39E-109 | 179 | 179 |
| BDKRB2    | 0.968589262 | 6.13E-112 | 4.22E-109 | 179 | 179 |
| BDKRB1    | 0.968589262 | 6.13E-112 | 4.22E-109 | 179 | 179 |
| DKFZP434C | 0.968589262 | 6.13E-112 | 4.22E-109 | 179 | 179 |
| ATG2B     | 0.968589262 | 6.13E-112 | 4.22E-109 | 179 | 179 |
| snoU13 EN | 0.968589262 | 6.13E-112 | 4.22E-109 | 179 | 179 |
| GSKIP     | 0.968595041 | 6.03E-112 | 4.22E-109 | 179 | 179 |
| AK7       | 0.968595041 | 6.03E-112 | 4.22E-109 | 179 | 179 |
| PAPOLA    | 0.968595041 | 6.03E-112 | 4.22E-109 | 179 | 179 |
| RN7SKP108 | 0.968595041 | 6.03E-112 | 4.22E-109 | 179 | 179 |
| VRK1      | 0.968800705 | 3.35E-112 | 3.07E-109 | 179 | 179 |
| LINC00618 | 0.968800705 | 3.35E-112 | 3.07E-109 | 179 | 179 |
| RN7SKP92  | 0.968996239 | 1.90E-112 | 1.89E-109 | 179 | 179 |
| BEGAIN    | 0.968996239 | 1.90E-112 | 1.89E-109 | 179 | 179 |
| RN7SL523F | 0.993041191 | 5.02E-171 | 5.41E-168 | 179 | 179 |
| SLC25A47  | 0.993041191 | 5.02E-171 | 5.41E-168 | 179 | 179 |
| WARS      | 0.993041191 | 5.02E-171 | 5.41E-168 | 179 | 179 |
| SETD3     | 0.994374298 | 2.10E-179 | 2.60E-176 | 179 | 179 |
| U6 ENSGOC | 0.994374298 | 2.10E-179 | 2.60E-176 | 179 | 179 |
| CCNK      | 0.994374298 | 2.10E-179 | 2.60E-176 | 179 | 179 |
| EML1      | 0.995468514 | 6.24E-188 | 9.10E-185 | 179 | 179 |
| RN7SL710F | 0.99618564  | 1.00E-194 | 1.55E-191 | 179 | 179 |
| C14orf64  | 0.99618564  | 1.00E-194 | 1.55E-191 | 179 | 179 |
| CYP46A1   | 0.996192379 | 8.53E-195 | 1.51E-191 | 179 | 179 |
| RN7SL714F | 0.996387917 | 7.10E-197 | 1.35E-193 | 179 | 179 |
| C14orf177 | 0.996387917 | 7.10E-197 | 1.35E-193 | 179 | 179 |
| BCL11B    | 0.996390323 | 6.68E-197 | 1.35E-193 | 179 | 179 |
| CCDC85C   | 0.996915279 | 4.21E-203 | 1.04E-199 | 179 | 179 |
| HHIPL1    | 0.996915279 | 4.21E-203 | 1.04E-199 | 179 | 179 |
| EVL       | 0.99708673  | 2.33E-205 | 7.22E-202 | 179 | 179 |
| MIR151B   | 0.99708673  | 2.33E-205 | 7.22E-202 | 179 | 179 |
| MIR342    | 0.99708673  | 2.33E-205 | 7.22E-202 | 179 | 179 |
| DEGS2     | 0.99708673  | 2.33E-205 | 7.22E-202 | 179 | 179 |

|          |             |           |           |     |     |
|----------|-------------|-----------|-----------|-----|-----|
| WDR25    | 0.999349342 | 1.47E-264 | 9.11E-261 | 179 | 179 |
| YY1      | 1           | 1.00E-264 | 1.00E-261 | 179 | 179 |
| SLC25A29 | 1           | 1.00E-264 | 1.00E-261 | 179 | 179 |
| MIR345   | 1           | 1.00E-264 | 1.00E-261 | 179 | 179 |
