# Supplementary material for: Upregulation of Yin-Yang-1 Associates with Proliferation and Glutamine Metabolism in Esophageal Carcinoma
Source: Hindawi journal article supplement (doi:10.1155/2022/9305081), 2022-03-20
Supplement: f4 [file 9305081.f4.pdf]

## BP

| Category      | Term    | Count | %           | PValue      | Genes      | List | TotalPop | Hits |
|---------------|---------|-------|-------------|-------------|------------|------|----------|------|
| GOTERM_BP_GO: | 0050871 | 16    | 0.813421454 | 5.33E-11    | IGHM, IGLC | 1279 | 1279     | 26   |
| GOTERM_BP_GO: | 0006910 | 16    | 0.813421454 | 2.23E-10    | IGHM, IGLC | 1279 | 1279     | 28   |
| GOTERM_BP_GO: | 0006911 | 17    | 0.864260295 | 1.17E-09    | IGHM, IGLC | 1279 | 1279     | 35   |
| GOTERM_BP_GO: | 0050855 | 19    | 0.965937977 | 4.50E-08    | IGHM, IGLC | 1279 | 1279     | 54   |
| GOTERM_BP_GO: | 0010529 | 7     | 0.355871886 | 4.71E-06    | APOBEC3C,  | 1279 | 1279     | 8    |
| GOTERM_BP_GO: | 0007131 | 10    | 0.508388409 | 2.75E-04    | RAD51B, SY | 1279 | 1279     | 30   |
| GOTERM_BP_GO: | 0048704 | 11    | 0.55922725  | 5.19E-04    | OSR2, GSC, | 1279 | 1279     | 39   |
| GOTERM_BP_GO: | 0070385 | 5     | 0.254194204 | 9.69E-04    | APOBEC3D,  | 1279 | 1279     | 7    |
| GOTERM_BP_GO: | 0060122 | 7     | 0.355871886 | 0.002195963 | CECR2, TTC | 1279 | 1279     | 19   |
| GOTERM_BP_GO: | 0090502 | 12    | 0.61006609  | 0.002526318 | POP1, APEX | 1279 | 1279     | 55   |
| GOTERM_BP_GO: | 0006749 | 12    | 0.61006609  | 0.002931986 | GGTLC2, GS | 1279 | 1279     | 56   |
| GOTERM_BP_GO: | 0009972 | 5     | 0.254194204 | 0.00308283  | APOBEC3C,  | 1279 | 1279     | 9    |
| GOTERM_BP_GO: | 0046474 | 5     | 0.254194204 | 0.00308283  | CHKB, CECF | 1279 | 1279     | 9    |
| GOTERM_BP_GO: | 0060071 | 16    | 0.813421454 | 0.003869335 | PSMB11, F2 | 1279 | 1279     | 92   |
| GOTERM_BP_GO: | 0048538 | 10    | 0.508388409 | 0.004425227 | TBX1, BCL1 | 1279 | 1279     | 43   |
| GOTERM_BP_GO: | 0050907 | 16    | 0.813421454 | 0.0052677   | OR4D2, OR4 | 1279 | 1279     | 95   |
| GOTERM_BP_GO: | 0042157 | 9     | 0.457549568 | 0.006883008 | APOL5, APC | 1279 | 1279     | 38   |
| GOTERM_BP_GO: | 0009952 | 14    | 0.711743772 | 0.007096495 | TBX1, CELS | 1279 | 1279     | 80   |
| GOTERM_BP_GO: | 0035970 | 5     | 0.254194204 | 0.007137311 | PDP1, PPM1 | 1279 | 1279     | 11   |
| GOTERM_BP_GO: | 0006958 | 16    | 0.813421454 | 0.007739871 | IGHM, IGLC | 1279 | 1279     | 99   |
| GOTERM_BP_GO: | 0006487 | 9     | 0.457549568 | 0.00809466  | FUT8, GAL3 | 1279 | 1279     | 39   |
| GOTERM_BP_GO: | 0007141 | 6     | 0.305033045 | 0.009393676 | RAD51C, ME | 1279 | 1279     | 18   |
| GOTERM_BP_GO: | 0071712 | 5     | 0.254194204 | 0.010068549 | POMT2, UFI | 1279 | 1279     | 12   |
| GOTERM_BP_GO: | 0043488 | 16    | 0.813421454 | 0.01105944  | PSMB11, S/ | 1279 | 1279     | 103  |
| GOTERM_BP_GO: | 0042148 | 4     | 0.203355363 | 0.01219463  | RAD51B, R/ | 1279 | 1279     | 7    |
| GOTERM_BP_GO: | 0045869 | 4     | 0.203355363 | 0.01219463  | APOBEC3D,  | 1279 | 1279     | 7    |
| GOTERM_BP_GO: | 0019370 | 6     | 0.305033045 | 0.014973271 | GGTLC2, GC | 1279 | 1279     | 20   |
| GOTERM_BP_GO: | 0071375 | 6     | 0.305033045 | 0.014973271 | XBP1, CYP1 | 1279 | 1279     | 20   |
| GOTERM_BP_GO: | 0008218 | 3     | 0.152516523 | 0.016484792 | SERPIND1,  | 1279 | 1279     | 3    |
| GOTERM_BP_GO: | 0006397 | 23    | 1.16929334  | 0.017450804 | SF3A1, RBM | 1279 | 1279     | 179  |
| GOTERM_BP_GO: | 0072089 | 4     | 0.203355363 | 0.018418142 | RNF43, ZNF | 1279 | 1279     | 8    |
| GOTERM_BP_GO: | 0019835 | 6     | 0.305033045 | 0.018449021 | GSDMD, TS1 | 1279 | 1279     | 21   |
| GOTERM_BP_GO: | 0097421 | 7     | 0.355871886 | 0.020019315 | NFKBIA, PF | 1279 | 1279     | 29   |
| GOTERM_BP_GO: | 0016192 | 20    | 1.016776817 | 0.022065592 | NSF, RAB2F | 1279 | 1279     | 152  |
| GOTERM_BP_GO: | 0016973 | 5     | 0.254194204 | 0.023121236 | ENY2, PABF | 1279 | 1279     | 15   |
| GOTERM_BP_GO: | 1900740 | 7     | 0.355871886 | 0.023459306 | PPP1R13B,  | 1279 | 1279     | 30   |
| GOTERM_BP_GO: | 0006605 | 8     | 0.406710727 | 0.026083448 | SYNGR1, TC | 1279 | 1279     | 39   |
| GOTERM_BP_GO: | 0003094 | 4     | 0.203355363 | 0.026085798 | XPNPEP3, J | 1279 | 1279     | 9    |
| GOTERM_BP_GO: | 0042742 | 19    | 0.965937977 | 0.026990088 | IGLC7, CEF | 1279 | 1279     | 145  |
| GOTERM_BP_GO: | 0048701 | 7     | 0.355871886 | 0.02727404  | TBX1, BMP4 | 1279 | 1279     | 31   |
| GOTERM_BP_GO: | 0001701 | 23    | 1.16929334  | 0.027311653 | JAG2, MBNI | 1279 | 1279     | 187  |
| GOTERM_BP_GO: | 0006869 | 12    | 0.61006609  | 0.028293593 | APOL5, APC | 1279 | 1279     | 76   |
| GOTERM_BP_GO: | 0080111 | 5     | 0.254194204 | 0.02901506  | APOBEC3C,  | 1279 | 1279     | 16   |
| GOTERM_BP_GO: | 0006750 | 5     | 0.254194204 | 0.02901506  | GGT5, GGT3 | 1279 | 1279     | 16   |
| GOTERM_BP_GO: | 0006520 | 8     | 0.406710727 | 0.029609759 | SLC7A4, GC | 1279 | 1279     | 40   |

|                      |    |             |             |            |      |     |
|----------------------|----|-------------|-------------|------------|------|-----|
| GOTERM_BP_GO:0016080 | 3  | 0.152516523 | 0.031310249 | SCRIB, PSF | 1279 | 4   |
| GOTERM_BP_GO:0048167 | 7  | 0.355871886 | 0.031477201 | JPH4, SIPA | 1279 | 32  |
| GOTERM_BP_GO:0031124 | 9  | 0.457549568 | 0.03384966  | CPSF1, PAF | 1279 | 50  |
| GOTERM_BP_GO:0090501 | 4  | 0.203355363 | 0.035195272 | RNASE7, RN | 1279 | 10  |
| GOTERM_BP_GO:0070286 | 4  | 0.203355363 | 0.035195272 | CCDC39, DN | 1279 | 10  |
| GOTERM_BP_GO:0030878 | 6  | 0.305033045 | 0.037469602 | TBX1, TG,  | 1279 | 25  |
| GOTERM_BP_GO:0006521 | 9  | 0.457549568 | 0.03757201  | PSMB11, PS | 1279 | 51  |
| GOTERM_BP_GO:0030178 | 9  | 0.457549568 | 0.041559243 | RNF43, ZNF | 1279 | 52  |
| GOTERM_BP_GO:0000168 | 29 | 1.474326385 | 0.042925268 | PSMB11, PI | 1279 | 262 |
| GOTERM_BP_GO:0021904 | 4  | 0.203355363 | 0.045717007 | FOXA1, BMF | 1279 | 11  |
| GOTERM_BP_GO:0007179 | 13 | 0.660904931 | 0.045941366 | KLF10, TGF | 1279 | 92  |
| GOTERM_BP_GO:0050918 | 7  | 0.355871886 | 0.046526316 | BMP4, LGAL | 1279 | 35  |
| GOTERM_BP_GO:0034644 | 8  | 0.406710727 | 0.046874108 | YY1, MYC,  | 1279 | 44  |
| GOTERM_BP_GO:0060070 | 12 | 0.61006609  | 0.049462636 | STK11, HOS | 1279 | 83  |
| GOTERM_BP_GO:0044550 | 3  | 0.152516523 | 0.049575079 | CYP11B2, C | 1279 | 5   |
| GOTERM_BP_GO:0072584 | 3  | 0.152516523 | 0.049575079 | PACSIN2, M | 1279 | 5   |
| GOTERM_BP_GO:0045040 | 3  | 0.152516523 | 0.049575079 | HSP90AA1,  | 1279 | 5   |

| Pop   | Total       | Fold Enrichm | Bonferroni  | Benjamini   | FDR         |
|-------|-------------|--------------|-------------|-------------|-------------|
| 16792 | 8.079388946 |              | 1.94E-07    | 1.94E-07    | 1.94E-07    |
| 16792 | 7.502289735 |              | 8.12E-07    | 4.06E-07    | 4.06E-07    |
| 16792 | 6.376946275 |              | 4.26E-06    | 1.42E-06    | 1.42E-06    |
| 16792 | 4.619465439 |              | 1.64E-04    | 4.09E-05    | 4.09E-05    |
| 16792 | 11.48788116 |              | 0.016958944 | 0.003420871 | 0.003418047 |
| 16792 | 4.376335679 |              | 0.631844342 | 0.16651868  | 0.166381212 |
| 16792 | 3.703053267 |              | 0.848461872 | 0.269489745 | 0.269267272 |
| 16792 | 9.377862169 |              | 0.970537499 | 0.440366033 | 0.440002494 |
| 16792 | 4.837002592 |              | 0.999660795 | 0.861769511 | 0.861058089 |
| 16792 | 2.864510626 |              | 0.999898175 | 0.861769511 | 0.861058089 |
| 16792 | 2.813358651 |              | 0.99997678  | 0.861769511 | 0.861058089 |
| 16792 | 7.293892798 |              | 0.999986601 | 0.861769511 | 0.861058089 |
| 16792 | 7.293892798 |              | 0.999986601 | 0.861769511 | 0.861058089 |
| 16792 | 2.283305572 |              | 0.99999239  | 1           | 0.999449491 |
| 16792 | 3.05325745  |              | 0.9999999   | 1           | 0.999449491 |
| 16792 | 2.211201185 |              | 0.99999995  | 1           | 0.999449491 |
| 16792 | 3.109501667 |              | 1           | 1           | 0.999449491 |
| 16792 | 2.297576231 |              | 1           | 1           | 0.999449491 |
| 16792 | 5.967730471 |              | 1           | 1           | 0.999449491 |
| 16792 | 2.121859723 |              | 1           | 1           | 0.999449491 |
| 16792 | 3.029770855 |              | 1           | 1           | 0.999449491 |
| 16792 | 4.376335679 |              | 1           | 1           | 0.999449491 |
| 16792 | 5.470419599 |              | 1           | 1           | 0.999449491 |
| 16792 | 2.039457404 |              | 1           | 1           | 0.999449491 |
| 16792 | 7.502289735 |              | 1           | 1           | 0.999449491 |
| 16792 | 7.502289735 |              | 1           | 1           | 0.999449491 |
| 16792 | 3.938702111 |              | 1           | 1           | 0.999449491 |
| 16792 | 3.938702111 |              | 1           | 1           | 0.999449491 |
| 16792 | 13.12900704 |              | 1           | 1           | 0.999449491 |
| 16792 | 1.686967385 |              | 1           | 1           | 0.999449491 |
| 16792 | 6.564503518 |              | 1           | 1           | 0.999449491 |
| 16792 | 3.751144868 |              | 1           | 1           | 0.999449491 |
| 16792 | 3.169070664 |              | 1           | 1           | 0.999449491 |
| 16792 | 1.727500926 |              | 1           | 1           | 0.999449491 |
| 16792 | 4.376335679 |              | 1           | 1           | 0.999449491 |
| 16792 | 3.063434975 |              | 1           | 1           | 0.999449491 |
| 16792 | 2.693129649 |              | 1           | 1           | 0.999449491 |
| 16792 | 5.835114239 |              | 1           | 1           | 0.999449491 |
| 16792 | 1.720352646 |              | 1           | 1           | 0.999449491 |
| 16792 | 2.964614492 |              | 1           | 1           | 0.999449491 |
| 16792 | 1.614797657 |              | 1           | 1           | 0.999449491 |
| 16792 | 2.073001111 |              | 1           | 1           | 0.999449491 |
| 16792 | 4.102814699 |              | 1           | 1           | 0.999449491 |
| 16792 | 4.102814699 |              | 1           | 1           | 0.999449491 |
| 16792 | 2.625801407 |              | 1           | 1           | 0.999449491 |

|       |             |   |   |             |
|-------|-------------|---|---|-------------|
| 16792 | 9.846755278 | 1 | 1 | 0.999449491 |
| 16792 | 2.871970289 | 1 | 1 | 0.999449491 |
| 16792 | 2.363221267 | 1 | 1 | 0.999449491 |
| 16792 | 5.251602815 | 1 | 1 | 0.999449491 |
| 16792 | 5.251602815 | 1 | 1 | 0.999449491 |
| 16792 | 3.150961689 | 1 | 1 | 0.999449491 |
| 16792 | 2.316883595 | 1 | 1 | 0.999449491 |
| 16792 | 2.272328141 | 1 | 1 | 0.999449491 |
| 16792 | 1.453210703 | 1 | 1 | 0.999449491 |
| 16792 | 4.774184377 | 1 | 1 | 0.999449491 |
| 16792 | 1.855185777 | 1 | 1 | 0.999449491 |
| 16792 | 2.625801407 | 1 | 1 | 0.999449491 |
| 16792 | 2.387092188 | 1 | 1 | 0.999449491 |
| 16792 | 1.898169692 | 1 | 1 | 0.999449491 |
| 16792 | 7.877404222 | 1 | 1 | 0.999449491 |
| 16792 | 7.877404222 | 1 | 1 | 0.999449491 |
| 16792 | 7.877404222 | 1 | 1 | 0.999449491 |

## CC

| Category      | Term    | Count | %           | PValue      | Genes      | List | TotalPop | Hits |
|---------------|---------|-------|-------------|-------------|------------|------|----------|------|
| GOTERM_CC_GO: | 0042571 | 13    | 0.660904931 | 9.06E-10    | IGLC7, IGH | 1365 |          | 19   |
| GOTERM_CC_GO: | 0005739 | 131   | 6.659888155 | 9.37E-04    | ISCA2, CEF | 1365 |          | 1331 |
| GOTERM_CC_GO: | 0005654 | 246   | 12.50635486 | 0.00285583  | CCNK, SMAF | 1365 |          | 2784 |
| GOTERM_CC_GO: | 0031362 | 7     | 0.355871886 | 0.004568994 | GGTLC2, GC | 1365 |          | 22   |
| GOTERM_CC_GO: | 0072562 | 21    | 1.067615658 | 0.009623987 | SERPINA3,  | 1365 |          | 152  |
| GOTERM_CC_GO: | 0005622 | 121   | 6.151499746 | 0.018028366 | GMFB, PITF | 1365 |          | 1332 |
| GOTERM_CC_GO: | 0033290 | 5     | 0.254194204 | 0.021878177 | EIF3L, EIF | 1365 |          | 15   |
| GOTERM_CC_GO: | 0005737 | 423   | 21.50482969 | 0.027974768 | RPL30, JRF | 1365 |          | 5222 |
| GOTERM_CC_GO: | 0005578 | 30    | 1.525165226 | 0.028908731 | SERPINA1,  | 1365 |          | 268  |
| GOTERM_CC_GO: | 0000932 | 12    | 0.61006609  | 0.030186221 | APOBEC3D,  | 1365 |          | 78   |
| GOTERM_CC_GO: | 0031012 | 32    | 1.626842908 | 0.036425051 | RPL30, COI | 1365 |          | 296  |
| GOTERM_CC_GO: | 0036513 | 4     | 0.203355363 | 0.043823614 | RNF139, SF | 1365 |          | 11   |
| GOTERM_CC_GO: | 0005743 | 44    | 2.236908998 | 0.045457185 | ATP5S, SLC | 1365 |          | 441  |
| GOTERM_CC_GO: | 0033063 | 3     | 0.152516523 | 0.048072565 | RAD51B, R/ | 1365 |          | 5    |
| GOTERM_CC_GO: | 0031258 | 5     | 0.254194204 | 0.048997786 | ITGB3, PD/ | 1365 |          | 19   |

| Pop   | Total       | Fold Enrichm | Bonferroni  | Benjamini   | FDR         |
|-------|-------------|--------------|-------------|-------------|-------------|
| 18224 | 9.134837093 |              | 6.30E-07    | 6.30E-07    | 6.30E-07    |
| 18224 | 1.31402702  |              | 0.478718679 | 0.325580093 | 0.325580093 |
| 18224 | 1.179714538 |              | 0.862981815 | 0.661600695 | 0.661600695 |
| 18224 | 4.248018648 |              | 0.958527595 | 0.793862636 | 0.793862636 |
| 18224 | 1.844534413 |              | 0.998794746 | 1           | 1           |
| 18224 | 1.212808413 |              | 0.999996773 | 1           | 1           |
| 18224 | 4.45030525  |              | 0.99999979  | 1           | 1           |
| 18224 | 1.081470196 |              | 0.99999997  | 1           | 1           |
| 18224 | 1.494505495 |              | 0.99999999  | 1           | 1           |
| 18224 | 2.053987039 |              | 0.99999999  | 1           | 1           |
| 18224 | 1.443342243 |              | 1           | 1           | 1           |
| 18224 | 4.854878455 |              | 1           | 1           | 1           |
| 18224 | 1.332064157 |              | 1           | 1           | 1           |
| 18224 | 8.010549451 |              | 1           | 1           | 1           |
| 18224 | 3.513398882 |              | 1           | 1           | 1           |

## MF

| Category      | Term    | Count | %           | PValue      | Genes      | List | TotalPop | Hits |
|---------------|---------|-------|-------------|-------------|------------|------|----------|------|
| GOTERM_MF_GO: | 0034987 | 16    | 0.813421454 | 5.00E-11    | IGHM, IGLC | 1280 | 1280     | 26   |
| GOTERM_MF_GO: | 0004540 | 11    | 0.55922725  | 2.76E-06    | RNASE11, F | 1280 | 1280     | 23   |
| GOTERM_MF_GO: | 0004519 | 15    | 0.762582613 | 2.19E-05    | RNASE11, F | 1280 | 1280     | 52   |
| GOTERM_MF_GO: | 0016814 | 7     | 0.355871886 | 6.19E-05    | APOBEC3C,  | 1280 | 1280     | 11   |
| GOTERM_MF_GO: | 0003840 | 6     | 0.305033045 | 4.52E-04    | GGTLC2, G  | 1280 | 1280     | 10   |
| GOTERM_MF_GO: | 0004522 | 4     | 0.203355363 | 0.001637511 | RNASE8, RN | 1280 | 1280     | 4    |
| GOTERM_MF_GO: | 0036374 | 4     | 0.203355363 | 0.007290621 | GGT5, GGT3 | 1280 | 1280     | 6    |
| GOTERM_MF_GO: | 0003823 | 16    | 0.813421454 | 0.010640645 | IGHM, IGLC | 1280 | 1280     | 103  |
| GOTERM_MF_GO: | 0032403 | 26    | 1.321809863 | 0.01307085  | UFD1L, TME | 1280 | 1280     | 206  |
| GOTERM_MF_GO: | 0044822 | 106   | 5.388917133 | 0.015035147 | RPL30, RPI | 1280 | 1280     | 1129 |
| GOTERM_MF_GO: | 0003743 | 11    | 0.55922725  | 0.015645189 | EIF4ENIF1, | 1280 | 1280     | 61   |
| GOTERM_MF_GO: | 0000400 | 5     | 0.254194204 | 0.017747102 | RAD51B, Y  | 1280 | 1280     | 14   |
| GOTERM_MF_GO: | 0000150 | 4     | 0.203355363 | 0.018195212 | RAD51B, R/ | 1280 | 1280     | 8    |
| GOTERM_MF_GO: | 0003676 | 93    | 4.728012201 | 0.020136829 | ZNF572, RE | 1280 | 1280     | 985  |
| GOTERM_MF_GO: | 0052650 | 4     | 0.203355363 | 0.025776747 | RDH12, RDI | 1280 | 1280     | 9    |
| GOTERM_MF_GO: | 0004126 | 4     | 0.203355363 | 0.025776747 | APOBEC3F,  | 1280 | 1280     | 9    |
| GOTERM_MF_GO: | 0016491 | 24    | 1.220132181 | 0.029494937 | TSTA3, EGI | 1280 | 1280     | 200  |
| GOTERM_MF_GO: | 0043563 | 52    | 2.643619725 | 0.030867307 | FOXA1, HNF | 1280 | 1280     | 518  |
| GOTERM_MF_GO: | 0047844 | 3     | 0.152516523 | 0.031044263 | APOBEC3G,  | 1280 | 1280     | 4    |
| GOTERM_MF_GO: | 0003700 | 88    | 4.473817997 | 0.045949751 | FOXA1, ZNF | 1280 | 1280     | 961  |
| GOTERM_MF_GO: | 0004090 | 3     | 0.152516523 | 0.049165387 | DHRS4L2, I | 1280 | 1280     | 5    |

| Pop   | Total       | Fold Enrichm | Bonferroni  | Benjamini   | FDR         |
|-------|-------------|--------------|-------------|-------------|-------------|
| 16881 | 8.115865385 |              | 5.38E-08    | 5.38E-08    | 5.36E-08    |
| 16881 | 6.307438859 |              | 0.002957522 | 0.00148095  | 0.001476813 |
| 16881 | 3.804311899 |              | 0.023294712 | 0.007856688 | 0.007834742 |
| 16881 | 8.392542614 |              | 0.064369603 | 0.016633174 | 0.016586712 |
| 16881 | 7.91296875  |              | 0.384605258 | 0.097076329 | 0.096805166 |
| 16881 | 13.18828125 |              | 0.827977278 | 0.293114533 | 0.292295778 |
| 16881 | 8.7921875   |              | 0.999613667 | 1           | 0.998136067 |
| 16881 | 2.048665049 |              | 0.999989761 | 1           | 0.998136067 |
| 16881 | 1.664540352 |              | 0.99999927  | 1           | 0.998136067 |
| 16881 | 1.238226583 |              | 0.999999914 | 1           | 0.998136067 |
| 16881 | 2.378214652 |              | 0.999999956 | 1           | 0.998136067 |
| 16881 | 4.710100446 |              | 0.999999996 | 1           | 0.998136067 |
| 16881 | 6.594140625 |              | 0.999999997 | 1           | 0.998136067 |
| 16881 | 1.245187976 |              | 1           | 1           | 0.998136067 |
| 16881 | 5.861458333 |              | 1           | 1           | 0.998136067 |
| 16881 | 5.861458333 |              | 1           | 1           | 0.998136067 |
| 16881 | 1.58259375  |              | 1           | 1           | 0.998136067 |
| 16881 | 1.323920125 |              | 1           | 1           | 0.998136067 |
| 16881 | 9.891210937 |              | 1           | 1           | 0.998136067 |
| 16881 | 1.207667794 |              | 1           | 1           | 0.998136067 |
| 16881 | 7.91296875  |              | 1           | 1           | 0.998136067 |



## KEGG

| Category  | Term       | Count | %           | PValue      | Genes      | List | Total | Pop | Hits |
|-----------|------------|-------|-------------|-------------|------------|------|-------|-----|------|
| KEGG_PATH | hsa05211:l | 12    | 0.61006609  | 0.006894107 | EGLN3, TGI |      | 496   |     | 66   |
| KEGG_PATH | hsa00603:l | 5     | 0.254194204 | 0.014835694 | NAGA, A4G  |      | 496   |     | 14   |
| KEGG_PATH | hsa05200:l | 41    | 2.084392476 | 0.015015852 | MAX, PTGE1 |      | 496   |     | 393  |
| KEGG_PATH | hsa00480:l | 9     | 0.457549568 | 0.027863322 | GGT5, GPX1 |      | 496   |     | 51   |
| KEGG_PATH | hsa03050:l | 8     | 0.406710727 | 0.035955315 | PSMB11, P  |      | 496   |     | 44   |
| KEGG_PATH | hsa05166:l | 27    | 1.372648704 | 0.041845365 | ADCY4, PD  |      | 496   |     | 254  |
| KEGG_PATH | hsa04668:l | 14    | 0.711743772 | 0.042649851 | RIPK3, LI  |      | 496   |     | 107  |
| KEGG_PATH | hsa04390:l | 18    | 0.915099136 | 0.042849916 | FZD2, TGF  |      | 496   |     | 151  |
| KEGG_PATH | hsa00600:l | 8     | 0.406710727 | 0.049118226 | GALC, ARS  |      | 496   |     | 47   |

| Pop  | Total       | Fold        | Enrichm | Bonferroni | Benjamini | FDR |
|------|-------------|-------------|---------|------------|-----------|-----|
| 6879 | 2.521627566 | 0.853861259 |         |            | 1         | 1   |
| 6879 | 4.953197005 | 0.984317698 |         |            | 1         | 1   |
| 6879 | 1.446888082 | 0.985095101 |         |            | 1         | 1   |
| 6879 | 2.447462049 | 0.999612566 |         |            | 1         | 1   |
| 6879 | 2.521627566 | 0.999962067 |         |            | 1         | 1   |
| 6879 | 1.474258636 | 0.999993096 |         |            | 1         | 1   |
| 6879 | 1.814629183 | 0.999994534 |         |            | 1         | 1   |
| 6879 | 1.65325251  | 0.999994842 |         |            | 1         | 1   |
| 6879 | 2.360672615 | 0.99999917  |         |            | 1         | 1   |
